# Supplementary material for: Young children have limited mucosal immunity when stimulated with an influenza vaccine in tonsil organoids
Source: Research Square preprint supplement (doi:10.21203/rs.3.rs-7842732/v1), 2025-10-30
Supplement: Supplementary file 1 [file 0692ffad6befa7c40a9f2cdc.xlsx]

## Sheet: Bcell adult downregulation
	day_group	marker	log2FC_mean	pval_adj_mean	pct1_mean	pct2_mean	n1	n2	ENTREZID	days	n_significant	n_distinct
1	day0	CXCL13	2.88889	3.3184e-13	0.0941333	0.0129111	3	3	10563	0	62	33
2	day0	ZBED2	2.27376	1.19001e-20	0.183133	0.0404222	3	3	79413	0	62	33
3	day0	ab-TCR-alpha-beta	2.20763	5.95905e-38	0.762933	0.575267	3	3	28755	0	62	33
4	day0	ab-CD278	1.90809	5.60441e-33	0.548044	0.275333	3	2	29851	0	62	33
5	day0	KIAA0101	1.32336	5.9607e-07	0.118978	0.0496667	3	3	9768	0	62	33
6	day0	CCNB1	1.29481	4.51194e-05	0.0786889	0.0311111	3	3	891	0	62	33
7	day0	MME	1.2823	4.78674e-05	0.0814444	0.0335111	3	3	4311	0	62	33
8	day0	CD9	1.2568	0.000406901	0.0617556	0.0247111	3	3	928	0	62	33
9	day0	TYMS	1.20484	6.50569e-06	0.113156	0.0511778	3	3	7298	0	62	33
10	day0	ab-CD279	1.11836	6.03077e-39	0.907711	0.815244	3	3	5133	0	62	33
11	day0	MCM4	1.09242	0.000177865	0.0907778	0.0431333	3	3	4173	0	62	33
12	day0	AICDA	1.07994	4.14387e-05	0.1582	0.0763	2	2	57379	0	62	33
13	day0	SLAMF1	1.01653	1.56741e-09	0.228578	0.1168	3	3	6504	0	62	33
14	day0	EGR1	0.969346	1.64627e-13	0.335378	0.184667	3	3	1958	0	62	33
15	day0	CLEC2D	0.951646	5.87794e-09	0.220022	0.110133	3	3	29121	0	62	33
16	day0	SLC2A3	0.948507	3.5094e-11	0.2946	0.164911	3	3	6515	0	62	33
17	day0	VNN2	0.910657	3.84591e-08	0.212378	0.110089	3	3	8875	0	62	33
18	day0	BNIP3L	0.900296	1.26923e-07	0.214333	0.1174	3	3	665	0	62	33
19	day0	BCL6	0.897056	1.90766e-09	0.2574	0.139489	3	3	604	0	62	33
20	day0	CD47	0.887929	0.000691119	0.102067	0.0551556	3	3	961	0	62	33
21	day0	IL10	0.880008	2.65389e-22	0.502178	0.312911	3	3	3586	0	62	33
22	day0	RGS1	0.853054	5.14941e-22	0.539711	0.320178	3	3	5996	0	62	33
23	day0	PTTG2	0.846294	0.000329056	0.107956	0.0563556	3	3	10744	0	62	33
24	day0	ATF6B	0.830544	4.40699e-06	0.180089	0.0982222	3	3	1388	0	62	33
25	day0	ADA	0.827587	1.07584e-08	0.257178	0.138556	3	3	100	0	62	33
26	day0	ab-CD158e1	0.738224	6.61978e-08	0.280756	0.165133	3	3	3811	0	62	33
27	day0	PCNA	0.692927	0.000246425	0.175422	0.111978	3	3	5111	0	62	33
28	day0	ALDOC	0.664324	1.8953e-05	0.229178	0.143533	3	3	230	0	62	33
29	day0	ADORA2A	0.654899	7.16642e-05	0.278233	0.1693	2	2	135	0	62	33
30	day0	CCR6	0.633906	9.70815e-08	0.345978	0.239644	3	3	1235	0	62	33
31	day0	TRAC	0.632611	1.66241e-06	0.286156	0.180111	3	3	28755	0	62	33
32	day0	HMGB2	0.61669	1.0841e-07	0.376556	0.2636	3	3	3148	0	62	33
33	day0	LDHA	0.568454	1.59762e-07	0.484567	0.334833	2	2	3939	0	62	33
34	day0	RUNX3	0.464697	2.62635e-06	0.415822	0.304356	3	3	864	0	62	33
35	day0	PDIA6	0.454569	4.2322e-05	0.346711	0.243111	3	3	10130	0	62	33
36	day0	BIN2	0.447452	2.51049e-05	0.370178	0.263956	3	3	51411	0	62	33
37	day0	BIRC3	0.433119	0.000104732	0.355644	0.265467	3	3	330	0	62	33
38	day0	ab-CD95	0.412502	1.52607e-14	0.999033	0.996367	2	2	355	0	62	33
39	day0	CXCR5	0.386836	3.11553e-07	0.546044	0.418978	3	3	643	0	62	33
40	day0	NFKB1	0.380403	0.000209087	0.401511	0.304844	3	3	4790	0	62	33
41	day0	CR2	0.376201	5.33022e-11	0.649422	0.524378	3	3	1380	0	62	33
42	day0	ab-CD161	0.370618	3.12448e-06	0.635844	0.509244	3	3	3820	0	62	33
43	day0	ab-Tim3	0.362973	7.16512e-06	0.911689	0.889889	3	3	84868	0	62	33
44	day0	BLNK	0.361214	1.77465e-05	0.512378	0.390133	3	3	29760	0	62	33
45	day0	TPI1	0.350958	1.83675e-10	0.665067	0.544822	3	3	7167	0	62	33
46	day0	PIK3AP1	0.33552	9.84643e-08	0.640622	0.514044	3	3	118788	0	62	33
47	day0	ab-CD4	0.306882	3.92138e-05	0.976867	0.973444	3	3	920	0	62	33
48	day0	ab-CD71	0.291499	1.68605e-08	0.981644	0.9604	3	3	7037	0	62	33
49	day0	ENO1	0.290794	6.81087e-13	0.759311	0.6598	3	3	2023	0	62	33
50	day0	PAX5	0.284876	3.61128e-05	0.583467	0.484289	3	3	5079	0	62	33
51	day0	ab-CD20	0.27827	2.55462e-22	1	0.998689	3	3	931	0	62	33
52	day0	ab-CD38	0.274416	1.43253e-10	1	0.999644	3	3	952	0	62	33
53	day0	CD40	0.273015	3.21518e-05	0.627133	0.5214	3	3	958	0	62	33
54	day0	LYN	0.268329	1.13953e-05	0.620689	0.520578	3	3	4067	0	62	33
55	day0	PGK1	0.258633	3.42933e-06	0.681333	0.577289	3	3	5230	0	62	33
56	day0	ab-CD183	0.239276	4.06133e-09	0.9966	0.992233	2	2	2833	0	62	33
57	day0	CD22	0.136499	3.29058e-12	0.955089	0.901333	3	3	933	0	62	33
58	day0	GAPDH	0.115908	3.98045e-11	0.938844	0.920556	3	3	2597	0	62	33
59	day0	CD53	0.101939	1.32085e-06	0.905911	0.876711	3	3	963	0	62	33
60	day0	MS4A1	0.0835842	1.04861e-13	0.972444	0.9552	3	3	931	0	62	33
61	day0	ab-HLA-DR	0.0783634	5.90826e-12	1	1	3	2	3122	0	62	33
62	day0	ab-CD21	0.059666	2.84916e-05	1	1	2	2	1380	0	62	33
63	day04	CXCL13	2.64445	5.15457e-11	0.096	0.0217333	3	3	10563	04	39	8
64	day04	ab-TCR-alpha-beta	1.58414	9.46619e-08	0.716022	0.720978	3	3	28755	04	39	8
65	day04	ab-CD278	1.18764	9.49353e-29	0.723956	0.526733	3	2	29851	04	39	8
66	day04	CR2	1.1632	8.27489e-27	0.448156	0.2548	3	3	1380	04	39	8
67	day04	ZBED2	0.923903	5.54729e-05	0.169178	0.106778	3	3	79413	04	39	8
68	day04	CCR6	0.775229	1.14696e-12	0.406756	0.3012	3	3	1235	04	39	8
69	day04	ab-IgD	0.711815	1.31993e-46	0.9958	0.990578	3	3	3495	04	39	8
70	day04	IL10	0.655759	1.45354e-15	0.541533	0.485044	3	3	3586	04	39	8
71	day04	ab-CD279	0.433527	2.2205e-13	0.965533	0.945067	3	3	5133	04	39	8
72	day04	CHI3L2	0.379634	0.000134106	0.419822	0.339889	3	3	1117	04	39	8
73	day04	ab-CD4	0.372939	5.65727e-11	0.964867	0.922244	3	3	920	04	39	8
74	day04	ab-CD21	0.350368	4.64926e-31	1	1	2	2	1380	04	39	8
75	day04	CD22	0.29122	6.36124e-29	0.905911	0.832022	3	3	933	04	39	8
76	day04	SELL	0.289803	5.02717e-20	0.843644	0.782556	3	3	6402	04	39	8
77	day04	IL4R	0.276688	4.05011e-05	0.545178	0.501333	3	3	3566	04	39	8
78	day04	TRBC2	0.263681	9.11223e-19	0.780978	0.750867	3	3	28638	04	39	8
79	day04	OAS1	0.215232	5.65597e-08	0.712467	0.6758	3	3	4938	04	39	8
80	day04	ab-CD19	0.212999	1.44198e-25	1	0.999644	3	3	930	04	39	8
81	day04	PAX5	0.210966	1.73254e-08	0.6894	0.683244	3	3	5079	04	39	8
82	day04	ab-IgM	0.209814	1.52159e-12	1	1	3	3	3507	04	39	8
83	day04	ab-CD3	0.207363	0.000575189	0.894511	0.850778	3	3	916	04	39	8
84	day04	BIRC3	0.202644	0.000168378	0.560178	0.568489	3	3	330	04	39	8
85	day04	ab-CD184	0.199783	0.000117176	0.998067	0.994644	3	3	7852	04	39	8
86	day04	MS4A1	0.171026	1.25452e-18	0.9396	0.899267	3	3	931	04	39	8
87	day04	CD52	0.1631	1.74115e-32	0.980889	0.968689	3	3	1043	04	39	8
88	day04	BTG1	0.161906	4.27696e-18	0.915889	0.917	3	3	694	04	39	8
89	day04	ab-CD45RA	0.13551	2.81009e-08	0.999756	1	3	3	5788	04	39	8
90	day04	HLA-DMA	0.0952043	3.16212e-08	0.908022	0.918356	3	3	3108	04	39	8
91	day04	CD164	0.0932545	9.32435e-07	0.750533	0.783356	3	3	8763	04	39	8
92	day04	ab-CD62L	0.0899305	8.36193e-07	1	1	3	3	6402	04	39	8
93	day04	CD53	0.0865583	1.62093e-06	0.880044	0.898	3	3	963	04	39	8
94	day04	HLA-DRA	0.0840351	3.23829e-06	0.990267	0.987533	3	3	3122	04	39	8
95	day04	ab-CD45	0.0687033	3.63015e-17	1	1	2	2	5788	04	39	8
96	day04	ASCL2	0.0635182	0.000978128	0.0141556	0	3	3	430	04	39	8
97	day04	CD74	0.0623951	8.49175e-21	1	1	3	3	972	04	39	8
98	day04	ab-HLA-DR	0.0588411	5.62624e-06	1	1	3	2	3122	04	39	8
99	day04	MT-CO1	0.0529506	2.64156e-09	1	0.9965	2	2	4512	04	39	8
100	day04	MT-CO2	0.0387922	6.42709e-05	0.9992	0.994933	2	2	4513	04	39	8
101	day04	CD79A	0.0357556	2.40447e-07	0.989933	0.990578	3	3	973	04	39	8
102	day06-07	CXCL13	3.6171	2.56673e-14	0.105667	0.0180444	3	3	10563	06-07	72	29
103	day06-07	CR2	1.9275	2.58241e-44	0.405089	0.127933	3	3	1380	06-07	72	29
104	day06-07	KLRK1	1.89868	1.36421e-07	0.0876444	0.0283556	3	3	22914	06-07	72	29
105	day06-07	ab-TCR-alpha-beta	1.83898	1.48616e-13	0.678422	0.623133	3	3	28755	06-07	72	29
106	day06-07	CD1D	1.51447	4.15087e-10	0.1734	0.0800889	3	3	912	06-07	72	29
107	day06-07	ZBED2	1.44739	2.29345e-07	0.1264	0.0559333	3	3	79413	06-07	72	29
108	day06-07	CCR6	1.32009	5.35168e-24	0.372533	0.180933	3	3	1235	06-07	72	29
109	day06-07	ab-CD278	1.29635	1.47177e-27	0.675778	0.469567	3	2	29851	06-07	72	29
110	day06-07	CD84	1.16321	5.81546e-05	0.120333	0.0659333	3	3	8832	06-07	72	29
111	day06-07	FCER2	1.06476	0.000263863	0.0945111	0.0487556	3	3	2208	06-07	72	29
112	day06-07	CHI3L2	1.03208	7.9671e-11	0.300311	0.178311	3	3	1117	06-07	72	29
113	day06-07	ab-IgD	0.885137	1.10864e-73	0.998889	0.994978	3	3	3495	06-07	72	29
114	day06-07	CD83	0.849296	9.31885e-21	0.512933	0.325	3	3	9308	06-07	72	29
115	day06-07	ASCL2	0.848511	0.00285245	0.0124444	0.000288889	3	3	430	06-07	72	29
116	day06-07	TNFRSF13C	0.84796	1.27509e-06	0.244711	0.161067	3	3	115650	06-07	72	29
117	day06-07	BCL6	0.782655	6.64206e-05	0.193444	0.127911	3	3	604	06-07	72	29
118	day06-07	TCL1A	0.751712	2.94401e-23	0.628756	0.393089	3	3	8115	06-07	72	29
119	day06-07	SLAMF1	0.738492	4.36852e-09	0.346289	0.237222	3	3	6504	06-07	72	29
120	day06-07	SELL	0.723186	2.28681e-39	0.755111	0.576489	3	3	6402	06-07	72	29
121	day06-07	IL10	0.645485	7.26755e-36	0.741578	0.661	3	3	3586	06-07	72	29
122	day06-07	PAX5	0.639948	4.96849e-19	0.602556	0.476	3	3	5079	06-07	72	29
123	day06-07	CD22	0.623242	1.96857e-49	0.886489	0.669289	3	3	933	06-07	72	29
124	day06-07	LCK	0.566657	7.40417e-06	0.368067	0.293711	3	3	3932	06-07	72	29
125	day06-07	ab-CD279	0.566054	4.5792e-16	0.946044	0.912867	3	3	5133	06-07	72	29
126	day06-07	IL4R	0.556255	8.74288e-12	0.554622	0.417467	3	3	3566	06-07	72	29
127	day06-07	LY86	0.537883	8.93133e-07	0.365333	0.275333	3	3	9450	06-07	72	29
128	day06-07	TRAC	0.523765	7.67204e-08	0.480578	0.431889	3	3	28755	06-07	72	29
129	day06-07	ab-CD23	0.51867	0.000479066	0.877833	0.870467	2	2	2208	06-07	72	29
130	day06-07	MS4A1	0.505742	1.51017e-49	0.934533	0.7542	3	3	931	06-07	72	29
131	day06-07	XAF1	0.499388	2.95518e-07	0.5307	0.423	2	2	54739	06-07	72	29
132	day06-07	STAT6	0.494704	4.70276e-06	0.4082	0.339578	3	3	6778	06-07	72	29
133	day06-07	ab-CD21	0.491254	7.45802e-47	1	1	2	2	1380	06-07	72	29
134	day06-07	ab-CD4	0.481565	5.69239e-20	0.981689	0.932533	3	3	920	06-07	72	29
135	day06-07	BIRC3	0.477758	1.76015e-09	0.543067	0.495533	3	3	330	06-07	72	29
136	day06-07	VPREB3	0.439787	1.09246e-13	0.677756	0.563778	3	3	29802	06-07	72	29
137	day06-07	IGHD-membrane	0.439262	3.1366e-07	0.494467	0.409756	3	3	3495	06-07	72	29
138	day06-07	CXCR5	0.434871	3.16472e-12	0.647289	0.517178	3	3	643	06-07	72	29
139	day06-07	TRBC2	0.418902	2.76606e-24	0.753978	0.701822	3	3	28638	06-07	72	29
140	day06-07	FAM65B	0.41755	2.44436e-05	0.4374	0.3778	3	3	9750	06-07	72	29
141	day06-07	ab-IgM	0.398942	3.55356e-21	0.998111	0.993689	3	3	3507	06-07	72	29
142	day06-07	BTG1	0.39163	3.13129e-37	0.926378	0.867511	3	3	694	06-07	72	29
143	day06-07	IFIT3	0.379005	3.80573e-13	0.700089	0.641689	3	3	3437	06-07	72	29
144	day06-07	PIK3AP1	0.373961	1.77063e-08	0.603667	0.538178	3	3	118788	06-07	72	29
145	day06-07	CD44	0.367332	0.000962038	0.448178	0.433467	3	3	960	06-07	72	29
146	day06-07	LYN	0.363651	1.64011e-08	0.6206	0.591133	3	3	4067	06-07	72	29
147	day06-07	CD40	0.349445	2.09229e-07	0.601778	0.557067	3	3	958	06-07	72	29
148	day06-07	CD53	0.31983	8.03758e-26	0.851133	0.834311	3	3	963	06-07	72	29
149	day06-07	IFITM2	0.306792	1.14373e-12	0.738222	0.734422	3	3	10581	06-07	72	29
150	day06-07	ab-CD19	0.306781	2.10692e-27	0.998911	0.996933	3	3	930	06-07	72	29
151	day06-07	HLA-DMA	0.306193	1.64497e-19	0.895622	0.855578	3	3	3108	06-07	72	29
152	day06-07	OAS1	0.305776	3.43832e-07	0.579244	0.575044	3	3	4938	06-07	72	29
153	day06-07	HLA-DRA	0.302922	2.91143e-26	0.985289	0.943378	3	3	3122	06-07	72	29
154	day06-07	CD52	0.298507	5.09643e-48	0.966578	0.943956	3	3	1043	06-07	72	29
155	day06-07	ab-CD3	0.268318	1.15986e-05	0.908222	0.8428	3	3	916	06-07	72	29
156	day06-07	CLEC2D	0.260305	3.47681e-06	0.612067	0.641667	3	3	29121	06-07	72	29
157	day06-07	PTPRC	0.255614	1.88097e-06	0.641333	0.655889	3	3	5788	06-07	72	29
158	day06-07	ab-CD20	0.245569	1.89888e-10	0.999378	0.996578	3	3	931	06-07	72	29
159	day06-07	CD164	0.217155	7.57006e-09	0.7148	0.748889	3	3	8763	06-07	72	29
160	day06-07	IRF1	0.200277	0.000227139	0.770633	0.7194	2	2	3659	06-07	72	29
161	day06-07	HLA-DPA1	0.182066	1.58041e-14	0.988378	0.987444	3	3	3113	06-07	72	29
162	day06-07	MX1	0.180148	4.29552e-14	0.817578	0.820422	3	3	4599	06-07	72	29
163	day06-07	ab-CD62L	0.178484	2.98461e-21	1	1	3	3	6402	06-07	72	29
164	day06-07	CD48	0.175217	5.66491e-07	0.811111	0.835911	3	3	962	06-07	72	29
165	day06-07	ab-HLA-DR	0.161897	6.86361e-26	1	1	3	2	3122	06-07	72	29
166	day06-07	CD74	0.159247	9.57838e-56	0.9998	1	3	3	972	06-07	72	29
167	day06-07	ab-CXCR5	0.128712	0.000320687	0.998511	0.998244	3	3	643	06-07	72	29
168	day06-07	ab-CD45RA	0.110806	7.02935e-06	1	1	3	3	5788	06-07	72	29
169	day06-07	MT-CO2	0.107399	1.73596e-16	0.9994	0.9957	2	2	4513	06-07	72	29
170	day06-07	LY6E	0.105583	3.35068e-06	0.9202	0.905633	2	2	4061	06-07	72	29
171	day06-07	MT-CO1	0.100188	1.65405e-17	0.998467	0.996567	2	2	4512	06-07	72	29
172	day06-07	CD79A	0.0929894	1.08352e-19	0.986778	0.975378	3	3	973	06-07	72	29
173	day06-07	HLA-A	0.0386218	9.10794e-07	0.999911	1	3	3	3105	06-07	72	29
174	day07-08	CXCL13	2.64126	2.05033e-10	0.0992	0.0254667	3	3	10563	07-08	68	26
175	day07-08	CD47	2.16533	0.000126554	0.0461778	0.0140889	3	3	961	07-08	68	26
176	day07-08	ab-TCR-alpha-beta	1.86204	3.10568e-14	0.678422	0.617822	3	3	28755	07-08	68	26
177	day07-08	CR2	1.795	8.87018e-36	0.367244	0.124867	3	3	1380	07-08	68	26
178	day07-08	CCR6	1.28976	1.28223e-20	0.344111	0.171111	3	3	1235	07-08	68	26
179	day07-08	ab-CD278	1.28148	1.07842e-27	0.679311	0.469567	3	2	29851	07-08	68	26
180	day07-08	ZBED2	1.22647	2.47309e-05	0.110422	0.0546444	3	3	79413	07-08	68	26
181	day07-08	CD1D	1.15231	1.25443e-05	0.141267	0.0790444	3	3	912	07-08	68	26
182	day07-08	FCER2	1.0419	0.000387896	0.0929778	0.0481333	3	3	2208	07-08	68	26
183	day07-08	CHI3L2	1.01329	1.66626e-08	0.265444	0.168311	3	3	1117	07-08	68	26
184	day07-08	ab-IgD	0.846315	1.11485e-68	0.998889	0.992511	3	3	3495	07-08	68	26
185	day07-08	TNFRSF13C	0.800189	1.37852e-05	0.241356	0.167933	3	3	115650	07-08	68	26
186	day07-08	CD83	0.782056	1.44071e-17	0.496733	0.322178	3	3	9308	07-08	68	26
187	day07-08	TCL1A	0.755002	5.57249e-23	0.625289	0.392178	3	3	8115	07-08	68	26
188	day07-08	SELL	0.741792	4.1432e-40	0.758244	0.577511	3	3	6402	07-08	68	26
189	day07-08	SLAMF1	0.693098	8.92287e-08	0.328778	0.230022	3	3	6504	07-08	68	26
190	day07-08	IL10	0.651817	5.70109e-34	0.739756	0.654733	3	3	3586	07-08	68	26
191	day07-08	IFNGR1	0.627248	0.000179278	0.281044	0.226356	3	3	3459	07-08	68	26
192	day07-08	PAX5	0.624271	3.31751e-17	0.586867	0.466578	3	3	5079	07-08	68	26
193	day07-08	CD22	0.608374	4.02744e-47	0.874422	0.667978	3	3	933	07-08	68	26
194	day07-08	IL4R	0.595329	3.185e-13	0.562822	0.410356	3	3	3566	07-08	68	26
195	day07-08	LCK	0.591232	3.9654e-06	0.363311	0.287111	3	3	3932	07-08	68	26
196	day07-08	LY86	0.556765	1.18949e-06	0.344178	0.251467	3	3	9450	07-08	68	26
197	day07-08	STAT6	0.530998	2.76695e-06	0.3964	0.324267	3	3	6778	07-08	68	26
198	day07-08	BIRC3	0.520592	1.6923e-10	0.542	0.48	3	3	330	07-08	68	26
199	day07-08	ab-CD23	0.51867	0.000506714	0.877833	0.870467	2	2	2208	07-08	68	26
200	day07-08	XAF1	0.499388	3.25106e-07	0.5307	0.423	2	2	54739	07-08	68	26
201	day07-08	ab-CD4	0.491767	2.43233e-20	0.981689	0.932533	3	3	920	07-08	68	26
202	day07-08	ab-CD21	0.491254	8.577e-47	1	1	2	2	1380	07-08	68	26
203	day07-08	ab-CD279	0.491242	3.40229e-14	0.946044	0.912867	3	3	5133	07-08	68	26
204	day07-08	MS4A1	0.484999	2.55552e-44	0.929422	0.757956	3	3	931	07-08	68	26
205	day07-08	TRBC2	0.465038	2.85737e-23	0.737933	0.669222	3	3	28638	07-08	68	26
206	day07-08	IGHD-membrane	0.458413	1.05544e-07	0.494089	0.409067	3	3	3495	07-08	68	26
207	day07-08	VPREB3	0.454293	5.57127e-14	0.673911	0.559489	3	3	29802	07-08	68	26
208	day07-08	TRAC	0.448696	1.50652e-05	0.459044	0.426422	3	3	28755	07-08	68	26
209	day07-08	BTG1	0.393862	2.22435e-35	0.926489	0.856844	3	3	694	07-08	68	26
210	day07-08	ab-IgM	0.379619	5.44664e-19	0.998111	0.993689	3	3	3507	07-08	68	26
211	day07-08	IFIT3	0.377764	1.13078e-12	0.702156	0.645644	3	3	3437	07-08	68	26
212	day07-08	OAS1	0.362354	2.75871e-08	0.589378	0.569267	3	3	4938	07-08	68	26
213	day07-08	LYN	0.358043	3.74426e-08	0.615178	0.579578	3	3	4067	07-08	68	26
214	day07-08	PIK3AP1	0.352182	2.66028e-07	0.589333	0.542978	3	3	118788	07-08	68	26
215	day07-08	CD40	0.342667	9.09953e-07	0.594089	0.539644	3	3	958	07-08	68	26
216	day07-08	CXCR5	0.323694	7.66532e-07	0.624844	0.5278	3	3	643	07-08	68	26
217	day07-08	CD52	0.31704	1.23337e-46	0.961444	0.927933	3	3	1043	07-08	68	26
218	day07-08	CD53	0.316991	1.33153e-24	0.8486	0.828867	3	3	963	07-08	68	26
219	day07-08	HLA-DMA	0.310642	1.46546e-18	0.892267	0.836511	3	3	3108	07-08	68	26
220	day07-08	HLA-DRA	0.310577	3.1583e-25	0.985844	0.932822	3	3	3122	07-08	68	26
221	day07-08	IFITM2	0.309084	1.95305e-12	0.739156	0.738311	3	3	10581	07-08	68	26
222	day07-08	CLEC2D	0.30706	1.62454e-06	0.615044	0.635022	3	3	29121	07-08	68	26
223	day07-08	ab-CD3	0.263991	1.37625e-05	0.908222	0.8428	3	3	916	07-08	68	26
224	day07-08	CD164	0.225942	1.79847e-08	0.712711	0.742911	3	3	8763	07-08	68	26
225	day07-08	ab-CD20	0.224434	2.32483e-09	0.999378	0.994889	3	3	931	07-08	68	26
226	day07-08	ab-CD19	0.218643	5.05416e-17	0.998911	0.996933	3	3	930	07-08	68	26
227	day07-08	MX1	0.216418	6.8021e-16	0.818578	0.813733	3	3	4599	07-08	68	26
228	day07-08	ab-CD184	0.214067	0.000199879	0.995378	0.989533	3	3	7852	07-08	68	26
229	day07-08	PTPRC	0.202065	0.000286024	0.623156	0.6518	3	3	5788	07-08	68	26
230	day07-08	IRF1	0.200277	0.000241377	0.770633	0.7194	2	2	3659	07-08	68	26
231	day07-08	HLA-DPA1	0.19135	1.37044e-13	0.986844	0.985778	3	3	3113	07-08	68	26
232	day07-08	ab-CD62L	0.18908	3.24588e-22	1	1	3	3	6402	07-08	68	26
233	day07-08	CD48	0.155868	4.85631e-05	0.800867	0.825911	3	3	962	07-08	68	26
234	day07-08	CD74	0.15519	2.39227e-52	0.9998	1	3	3	972	07-08	68	26
235	day07-08	ab-HLA-DR	0.138141	8.53777e-21	1	1	3	2	3122	07-08	68	26
236	day07-08	ab-CD45RA	0.115712	2.11358e-06	1	1	3	3	5788	07-08	68	26
237	day07-08	MT-CO2	0.107399	1.9091e-16	0.9994	0.9957	2	2	4513	07-08	68	26
238	day07-08	LY6E	0.105583	3.64729e-06	0.9202	0.905633	2	2	4061	07-08	68	26
239	day07-08	MT-CO1	0.100188	1.82808e-17	0.998467	0.996567	2	2	4512	07-08	68	26
240	day07-08	CD79A	0.0899244	4.74195e-19	0.983778	0.9744	3	3	973	07-08	68	26
241	day07-08	HLA-A	0.04007	7.20638e-05	0.999911	1	3	3	3105	07-08	68	26
242	day10	CXCL13	3.40452	8.1366e-14	0.101156	0.0168222	3	3	10563	10	76	31
243	day10	ab-TCR-alpha-beta	1.78475	6.22827e-12	0.702156	0.655822	3	3	28755	10	76	31
244	day10	ZBED2	1.59947	4.74668e-08	0.124867	0.0515556	3	3	79413	10	76	31
245	day10	CR2	1.44942	1.35785e-26	0.355844	0.151978	3	3	1380	10	76	31
246	day10	ab-CD278	1.42325	3.54541e-31	0.692222	0.486667	3	2	29851	10	76	31
247	day10	CCR6	1.31174	8.14221e-18	0.308333	0.156933	3	3	1235	10	76	31
248	day10	IL10	1.12241	9.30286e-24	0.494933	0.372244	3	3	3586	10	76	31
249	day10	CD1D	1.07176	4.89941e-05	0.151711	0.0943556	3	3	912	10	76	31
250	day10	SLAMF1	1.03294	9.0408e-16	0.354933	0.203733	3	3	6504	10	76	31
251	day10	CHI3L2	1.02505	2.80853e-08	0.248556	0.1556	3	3	1117	10	76	31
252	day10	FOXO1	1.00882	0.000106963	0.154956	0.0979778	3	3	2308	10	76	31
253	day10	BCL6	0.95199	6.91515e-06	0.176733	0.105667	3	3	604	10	76	31
254	day10	CD83	0.921078	6.82616e-24	0.504156	0.299489	3	3	9308	10	76	31
255	day10	SLC2A3	0.904156	5.07592e-06	0.261644	0.195489	3	3	6515	10	76	31
256	day10	CD200	0.795527	5.55728e-05	0.184044	0.117133	3	3	4345	10	76	31
257	day10	IL4R	0.762481	1.05063e-15	0.492333	0.343867	3	3	3566	10	76	31
258	day10	PIK3IP1	0.755864	3.11192e-08	0.330578	0.238622	3	3	113791	10	76	31
259	day10	IFNGR1	0.752652	4.75673e-06	0.268178	0.194933	3	3	3459	10	76	31
260	day10	TCL1A	0.72239	3.91479e-21	0.6334	0.390644	3	3	8115	10	76	31
261	day10	ab-IgD	0.703118	2.59109e-50	0.997222	0.994644	3	3	3495	10	76	31
262	day10	SELL	0.671681	1.67429e-38	0.7652	0.597244	3	3	6402	10	76	31
263	day10	PAX5	0.665425	2.06591e-19	0.582711	0.445822	3	3	5079	10	76	31
264	day10	CD22	0.584623	1.40958e-44	0.874667	0.679333	3	3	933	10	76	31
265	day10	ab-CD21	0.580421	2.07491e-53	0.9994	0.997067	2	2	1380	10	76	31
266	day10	ab-CD279	0.569791	1.5917e-20	0.9666	0.931133	3	3	5133	10	76	31
267	day10	LCK	0.561111	3.99959e-07	0.3922	0.312156	3	3	3932	10	76	31
268	day10	BIRC3	0.556788	1.60252e-10	0.514956	0.444267	3	3	330	10	76	31
269	day10	TRBC2	0.538675	1.55835e-29	0.736333	0.619711	3	3	28638	10	76	31
270	day10	CLEC2D	0.52436	6.35601e-10	0.532911	0.495644	3	3	29121	10	76	31
271	day10	ab-CD4	0.521064	9.36528e-26	0.987622	0.937267	3	3	920	10	76	31
272	day10	BTG1	0.500565	5.1095e-56	0.918867	0.828267	3	3	694	10	76	31
273	day10	MS4A1	0.484853	3.10255e-46	0.929422	0.766511	3	3	931	10	76	31
274	day10	FAM65B	0.451642	8.08402e-06	0.418644	0.3472	3	3	9750	10	76	31
275	day10	CXCR5	0.435482	1.70735e-12	0.626889	0.508133	3	3	643	10	76	31
276	day10	STAT6	0.428119	2.18581e-05	0.407289	0.348378	3	3	6778	10	76	31
277	day10	TRAC	0.422739	0.000164898	0.438756	0.418289	3	3	28755	10	76	31
278	day10	ab-CD19	0.390873	9.15979e-56	0.999133	0.993022	3	3	930	10	76	31
279	day10	HLA-DRA	0.386167	1.13076e-37	0.983244	0.897289	3	3	3122	10	76	31
280	day10	IRF1	0.379551	8.30641e-13	0.784967	0.695	2	2	3659	10	76	31
281	day10	ab-CD3	0.379183	1.06239e-12	0.960622	0.881022	3	3	916	10	76	31
282	day10	IRF8	0.378555	3.09306e-11	0.683978	0.5914	3	3	3394	10	76	31
283	day10	CXCR4	0.377459	3.02871e-09	0.626578	0.5902	3	3	7852	10	76	31
284	day10	LYN	0.364151	2.01848e-08	0.612444	0.567556	3	3	4067	10	76	31
285	day10	HLA-DMA	0.363413	1.155e-26	0.884422	0.832244	3	3	3108	10	76	31
286	day10	ab-IgM	0.357875	1.81263e-16	0.996778	0.982822	3	3	3507	10	76	31
287	day10	PIK3AP1	0.350375	1.49028e-08	0.614778	0.562311	3	3	118788	10	76	31
288	day10	ab-CD20	0.336487	2.47363e-14	0.9978	0.994711	3	3	931	10	76	31
289	day10	APOBEC3G	0.330916	8.06682e-08	0.577778	0.601622	3	3	60489	10	76	31
290	day10	CD52	0.322531	2.28738e-44	0.970867	0.9392	3	3	1043	10	76	31
291	day10	OAS1	0.29638	8.68445e-06	0.5736	0.593533	3	3	4938	10	76	31
292	day10	CD164	0.291978	6.94599e-10	0.683356	0.702044	3	3	8763	10	76	31
293	day10	CD53	0.287268	7.15748e-23	0.834889	0.844578	3	3	963	10	76	31
294	day10	ab-CD184	0.287236	2.10991e-07	0.990311	0.983667	3	3	7852	10	76	31
295	day10	CD40	0.259478	6.05073e-05	0.577467	0.577867	3	3	958	10	76	31
296	day10	HLA-DPA1	0.253741	6.19577e-22	0.986867	0.978289	3	3	3113	10	76	31
297	day10	CD48	0.248977	1.72887e-10	0.772644	0.7798	3	3	962	10	76	31
298	day10	VPREB3	0.247684	4.39163e-05	0.687222	0.631333	3	3	29802	10	76	31
299	day10	ab-CD62L	0.242362	2.16339e-30	1	1	3	3	6402	10	76	31
300	day10	PTPRC	0.212786	8.04137e-05	0.664889	0.688867	3	3	5788	10	76	31
301	day10	BANK1	0.206536	1.26249e-06	0.864733	0.819667	2	2	55024	10	76	31
302	day10	HLA-DQB1	0.202325	8.04789e-06	0.850889	0.815933	3	3	3119	10	76	31
303	day10	ab-CD73	0.198375	0.000209998	0.9809	0.9621	2	2	4907	10	76	31
304	day10	CD74	0.183346	1.29511e-54	1	0.999867	3	3	972	10	76	31
305	day10	IFITM2	0.180485	7.54445e-07	0.761889	0.812267	3	3	10581	10	76	31
306	day10	IFIT3	0.165691	8.85743e-05	0.781511	0.781533	3	3	3437	10	76	31
307	day10	ab-CD161	0.148316	0.000723258	0.670289	0.565756	3	3	3820	10	76	31
308	day10	ab-CXCR5	0.133476	1.13633e-06	0.999356	0.998556	3	3	643	10	76	31
309	day10	ab-CD45RA	0.130579	1.20895e-11	1	1	3	3	5788	10	76	31
310	day10	ab-HLA-DR	0.12482	1.05424e-16	1	1	3	2	3122	10	76	31
311	day10	MT-CO2	0.116249	5.94492e-11	0.9988	0.998267	2	2	4513	10	76	31
312	day10	MT-CO1	0.112925	7.64122e-10	0.998467	0.997833	2	2	4512	10	76	31
313	day10	CD79A	0.0888631	1.76058e-21	0.978778	0.978422	3	3	973	10	76	31
314	day10	PGK1	0.0863312	0.000166917	0.787067	0.8562	3	3	5230	10	76	31
315	day10	TPI1	0.085701	1.43871e-05	0.826267	0.898489	3	3	7167	10	76	31
316	day10	HLA-A	0.0789393	9.82978e-14	0.999689	0.999911	3	3	3105	10	76	31
317	day10	MX1	0.0759582	1.02422e-06	0.823267	0.903133	3	3	4599	10	76	31
318	day12-14	CXCL13	2.20867	3.07814e-08	0.0976222	0.0325556	3	3	10563	12-14	60	26
319	day12-14	CD47	2.08458	1.11402e-05	0.0664889	0.0227778	3	3	961	12-14	60	26
320	day12-14	CD1A	2.00528	0.00052443	0.0388667	0.0118444	3	3	909	12-14	60	26
321	day12-14	ZBED2	1.5993	5.50707e-07	0.1096	0.0462667	3	3	79413	12-14	60	26
322	day12-14	ab-TCR-alpha-beta	1.59275	3.4572e-10	0.751933	0.753244	3	3	28755	12-14	60	26
323	day12-14	CR2	1.59192	3.41243e-34	0.394444	0.154489	3	3	1380	12-14	60	26
324	day12-14	KLRK1	1.30871	0.000254155	0.0714	0.0318	3	3	22914	12-14	60	26
325	day12-14	CCR6	1.23738	2.40946e-19	0.345111	0.180222	3	3	1235	12-14	60	26
326	day12-14	NFATC3	1.22815	8.34777e-09	0.211422	0.119911	3	3	4775	12-14	60	26
327	day12-14	IL10	1.04837	8.82322e-19	0.472089	0.364911	3	3	3586	12-14	60	26
328	day12-14	CD84	1.03426	7.59843e-05	0.138089	0.0820667	3	3	8832	12-14	60	26
329	day12-14	ab-CD278	1.03349	2.85367e-15	0.670467	0.592133	3	2	29851	12-14	60	26
330	day12-14	SLAMF1	0.96801	3.88566e-16	0.3772	0.2174	3	3	6504	12-14	60	26
331	day12-14	CHI3L2	0.947644	1.24254e-06	0.2158	0.133822	3	3	1117	12-14	60	26
332	day12-14	FOXO1	0.931122	7.20576e-05	0.156111	0.0957778	3	3	2308	12-14	60	26
333	day12-14	IFNGR1	0.928625	1.53318e-09	0.298889	0.198044	3	3	3459	12-14	60	26
334	day12-14	IL4R	0.873824	5.25414e-22	0.510756	0.321667	3	3	3566	12-14	60	26
335	day12-14	CD83	0.809568	2.92769e-20	0.504644	0.320133	3	3	9308	12-14	60	26
336	day12-14	ab-IgD	0.750724	7.95114e-64	0.999622	0.990822	3	3	3495	12-14	60	26
337	day12-14	SELL	0.712454	9.65544e-47	0.802733	0.608467	3	3	6402	12-14	60	26
338	day12-14	TCL1A	0.702282	1.90346e-24	0.689711	0.442089	3	3	8115	12-14	60	26
339	day12-14	TRBC2	0.654845	7.48454e-41	0.7594	0.588333	3	3	28638	12-14	60	26
340	day12-14	CD22	0.557498	3.79475e-51	0.892467	0.71	3	3	933	12-14	60	26
341	day12-14	PAX5	0.540893	5.42931e-16	0.612311	0.481933	3	3	5079	12-14	60	26
342	day12-14	BIRC3	0.528219	1.92296e-08	0.486711	0.413044	3	3	330	12-14	60	26
343	day12-14	ab-CD21	0.51902	2.41389e-52	0.999767	0.994033	2	2	1380	12-14	60	26
344	day12-14	BTG1	0.468508	6.52947e-57	0.930356	0.832667	3	3	694	12-14	60	26
345	day12-14	CLEC2D	0.461658	1.44019e-05	0.456156	0.418444	3	3	29121	12-14	60	26
346	day12-14	ab-CD279	0.455678	3.7949e-09	0.959533	0.948067	3	3	5133	12-14	60	26
347	day12-14	LY86	0.453452	2.45442e-06	0.405378	0.328956	3	3	9450	12-14	60	26
348	day12-14	MS4A1	0.444996	4.07436e-59	0.952533	0.808178	3	3	931	12-14	60	26
349	day12-14	LYN	0.42051	2.61429e-10	0.597644	0.525689	3	3	4067	12-14	60	26
350	day12-14	STAT6	0.418429	2.46849e-06	0.447133	0.368889	3	3	6778	12-14	60	26
351	day12-14	LCK	0.404842	6.84355e-05	0.400111	0.338667	3	3	3932	12-14	60	26
352	day12-14	IRF8	0.389949	2.14061e-09	0.639978	0.529889	3	3	3394	12-14	60	26
353	day12-14	CD52	0.389254	6.52933e-61	0.963867	0.911889	3	3	1043	12-14	60	26
354	day12-14	HLA-DMA	0.382483	1.82217e-28	0.8876	0.811533	3	3	3108	12-14	60	26
355	day12-14	PIK3AP1	0.378028	4.28074e-09	0.611933	0.532044	3	3	118788	12-14	60	26
356	day12-14	CXCR5	0.376724	1.19959e-09	0.611933	0.516178	3	3	643	12-14	60	26
357	day12-14	PTPRC	0.370647	7.44794e-07	0.550044	0.520378	3	3	5788	12-14	60	26
358	day12-14	ab-IgM	0.334463	2.21382e-20	0.999644	0.998867	3	3	3507	12-14	60	26
359	day12-14	HLA-DRA	0.323133	6.57798e-34	0.985556	0.909933	3	3	3122	12-14	60	26
360	day12-14	ab-CD62L	0.321774	2.80824e-42	1	0.999867	3	3	6402	12-14	60	26
361	day12-14	CD48	0.314744	6.94172e-11	0.727311	0.693644	3	3	962	12-14	60	26
362	day12-14	ab-CD20	0.302143	8.31699e-15	0.999067	0.998844	3	3	931	12-14	60	26
363	day12-14	CD164	0.296251	9.65182e-10	0.702978	0.693267	3	3	8763	12-14	60	26
364	day12-14	CD53	0.292907	3.79534e-21	0.850267	0.8296	3	3	963	12-14	60	26
365	day12-14	IGHD-membrane	0.273551	0.000191796	0.536622	0.493044	3	3	3495	12-14	60	26
366	day12-14	APOBEC3G	0.268767	5.82292e-07	0.622978	0.635667	3	3	60489	12-14	60	26
367	day12-14	IRF1	0.230603	6.44605e-07	0.794567	0.7418	2	2	3659	12-14	60	26
368	day12-14	HLA-DPA1	0.217768	1.31148e-20	0.987289	0.971867	3	3	3113	12-14	60	26
369	day12-14	ab-CD19	0.178682	1.01249e-13	0.997778	0.994311	3	3	930	12-14	60	26
370	day12-14	ab-CD45RA	0.168328	8.78073e-17	1	1	3	3	5788	12-14	60	26
371	day12-14	CD74	0.150978	1.46834e-57	1	1	3	3	972	12-14	60	26
372	day12-14	HLA-DQB1	0.150032	0.000498764	0.8704	0.842733	3	3	3119	12-14	60	26
373	day12-14	ab-HLA-DR	0.148381	9.77284e-26	1	1	3	2	3122	12-14	60	26
374	day12-14	CD79A	0.112346	2.39378e-32	0.993422	0.985022	3	3	973	12-14	60	26
375	day12-14	ab-CXCR5	0.10739	5.36924e-05	0.999733	0.999044	3	3	643	12-14	60	26
376	day12-14	MX1	0.0952999	0.000668556	0.855533	0.879044	3	3	4599	12-14	60	26
377	day12-14	MT-CO1	0.0704752	1.18644e-06	0.9998	0.9989	2	2	4512	12-14	60	26

## Sheet: Bcell adult upregulation
	day_group	marker	log2FC_mean	pval_adj_mean	pct1_mean	pct2_mean	n1	n2	ENTREZID	days	n_significant	n_distinct
1	day0	IGHG4-secreted	-4.93177	4.46242e-17	0.00471111	0.0943111	3	3	3503	0	46	25
2	day0	IL32	-3.29835	1.95659e-21	0.0190889	0.145356	3	3	9235	0	46	25
3	day0	ab-CD89	-2.45255	5.89643e-13	0.537444	0.5974	3	3	2204	0	46	25
4	day0	CCL4	-1.69171	0.000592637	0.0145333	0.0440889	3	3	6351	0	46	25
5	day0	IFITM3	-1.47927	5.58242e-30	0.151156	0.383178	3	3	10410	0	46	25
6	day0	CD79B	-1.26318	4.16606e-101	0.431467	0.962911	3	3	974	0	46	25
7	day0	CD200	-1.20332	1.60726e-07	0.0662667	0.145689	3	3	4345	0	46	25
8	day0	IGHA1-secreted	-1.19227	2.04361e-28	0.229311	0.467956	3	3	3493	0	46	25
9	day0	LGALS1	-1.16356	5.06038e-08	0.0923111	0.181622	3	3	3956	0	46	25
10	day0	CCR7	-1.15943	3.88303e-11	0.104022	0.222378	3	3	1236	0	46	25
11	day0	TNFSF13	-1.05293	7.57336e-05	0.0617778	0.117422	3	3	8741	0	46	25
12	day0	CD6	-0.997584	6.38811e-05	0.0600444	0.117422	3	3	923	0	46	25
13	day0	IL23R	-0.845477	4.37738e-14	0.264333	0.393756	3	3	149233	0	46	25
14	day0	DDIT4	-0.799428	8.2699e-10	0.200644	0.320956	3	3	54541	0	46	25
15	day0	HLA-DRB3	-0.788395	3.90811e-24	0.368622	0.583867	3	3	3125	0	46	25
16	day0	ab-CD8	-0.772211	1.74882e-09	0.689533	0.710089	3	3	925	0	46	25
17	day0	SPOCK2	-0.743427	3.26682e-05	0.124022	0.198711	3	3	9806	0	46	25
18	day0	ab-CD73	-0.706314	2.4937e-23	0.9578	0.974567	2	2	4907	0	46	25
19	day0	NFATC1	-0.64722	0.000114456	0.157689	0.224778	3	3	4772	0	46	25
20	day0	CD37	-0.593162	2.81148e-27	0.658911	0.986667	3	3	951	0	46	25
21	day0	IGHM-secreted	-0.584167	3.59063e-25	0.534667	0.733067	3	3	3507	0	46	25
22	day0	ab-CD24	-0.575161	1.66902e-11	0.836567	0.9058	2	2	100133941	0	46	25
23	day0	LGALS9	-0.571683	4.91332e-09	0.307333	0.437489	3	3	3965	0	46	25
24	day0	IGHM-membrane	-0.530996	4.26929e-14	0.561578	0.821556	3	3	3507	0	46	25
25	day0	ITGAL	-0.51871	8.15474e-05	0.232622	0.302533	3	3	3683	0	46	25
26	day0	PIK3IP1	-0.496112	1.82242e-06	0.295956	0.403689	3	3	113791	0	46	25
27	day0	JUNB	-0.488844	4.257e-08	0.370644	0.487644	3	3	3726	0	46	25
28	day0	CD24	-0.486063	1.66771e-09	0.391044	0.527889	3	3	100133941	0	46	25
29	day0	IGHD-membrane	-0.482345	1.36713e-09	0.4612	0.651044	3	3	3495	0	46	25
30	day0	CXCR4	-0.477645	3.77006e-30	0.670644	0.856689	3	3	7852	0	46	25
31	day0	GNAI2	-0.456038	3.38104e-08	0.390778	0.509133	3	3	2771	0	46	25
32	day0	ab-CCR7	-0.416284	9.61012e-08	0.761644	0.813756	3	3	1236	0	46	25
33	day0	FCER2	-0.402428	2.31414e-07	0.420867	0.538756	3	3	2208	0	46	25
34	day0	CD72	-0.344805	0.000183575	0.366933	0.453111	3	3	971	0	46	25
35	day0	ab-CD56	-0.303569	6.32125e-13	0.841311	0.919178	3	3	4684	0	46	25
36	day0	IGHG2-secreted	-0.290963	6.86704e-07	0.571022	0.6992	3	3	3501	0	46	25
37	day0	HLA-DQB1	-0.245891	1.634e-17	0.850333	0.948689	3	3	3119	0	46	25
38	day0	VPREB3	-0.233396	1.80431e-05	0.638511	0.7286	3	3	29802	0	46	25
39	day0	ab-CD184	-0.192199	1.06823e-07	0.950733	0.976378	3	3	7852	0	46	25
40	day0	ab-CD69	-0.18503	2.56741e-05	0.995233	0.997633	2	2	969	0	46	25
41	day0	ab-CD25	-0.166641	8.71386e-05	0.866244	0.9182	3	3	3559	0	46	25
42	day0	ab-CD39	-0.164531	5.62675e-06	0.999622	0.999422	3	3	953	0	46	25
43	day0	IGKC	-0.159609	0.000105704	0.843067	0.914889	3	3	3514	0	46	25
44	day0	ab-IgG	-0.12766	0.000405566	0.932489	0.929533	3	3	3500	0	46	25
45	day0	ab-CD45	-0.0750396	7.18458e-19	1	1	2	2	5788	0	46	25
46	day0	MT-CO2	-0.0302077	2.04525e-07	0.9994	0.995733	2	2	4513	0	46	25
47	day04	IGHG4-secreted	-4.68431	3.50295e-35	0.00802222	0.1846	3	3	3503	04	134	105
48	day04	CXCL9	-3.08592	3.62321e-05	0.00351111	0.0299778	3	3	4283	04	134	105
49	day04	IL32	-3.04058	6.66003e-33	0.0275333	0.216956	3	3	9235	04	134	105
50	day04	CXCL10	-2.98116	2.98514e-16	0.0164	0.114622	3	3	3627	04	134	105
51	day04	CST7	-2.57714	0.00010588	0.00537778	0.0313333	3	3	8530	04	134	105
52	day04	MKI67	-2.49858	6.31044e-10	0.0131778	0.0757556	3	3	4288	04	134	105
53	day04	LAG3	-2.41395	8.57462e-20	0.0318667	0.162978	3	3	3902	04	134	105
54	day04	LRRC32	-2.34571	5.15544e-06	0.0110222	0.0496667	3	3	2615	04	134	105
55	day04	ab-CD89	-2.17448	4.61622e-09	0.684178	0.715733	3	3	2204	04	134	105
56	day04	LGALS1	-2.04412	6.71354e-69	0.1522	0.543933	3	3	3956	04	134	105
57	day04	IL2RA	-1.62529	3.44127e-13	0.0471778	0.155156	3	3	3559	04	134	105
58	day04	CCL5	-1.61908	1.03857e-08	0.0276667	0.0959111	3	3	6352	04	134	105
59	day04	CCR1	-1.61262	7.79283e-10	0.0375111	0.118378	3	3	1230	04	134	105
60	day04	TNFSF13	-1.5892	4.70154e-17	0.0657333	0.208511	3	3	8741	04	134	105
61	day04	CXCR3	-1.50672	3.09434e-29	0.126711	0.362489	3	3	2833	04	134	105
62	day04	SELPLG	-1.50068	6.06422e-13	0.0448444	0.151111	3	3	6404	04	134	105
63	day04	CCL22	-1.48641	1.98084e-07	0.0274667	0.0869556	3	3	6367	04	134	105
64	day04	GZMB	-1.47598	0.000130964	0.0256667	0.0650667	3	3	3002	04	134	105
65	day04	IGHG1-membrane	-1.47218	1.99145e-21	0.0922444	0.275911	3	3	3500	04	134	105
66	day04	AURKB	-1.43506	4.51426e-11	0.0474	0.143533	3	3	9212	04	134	105
67	day04	KIAA0101	-1.41906	6.56874e-14	0.0776889	0.204911	3	3	9768	04	134	105
68	day04	CD300A	-1.40985	2.75181e-09	0.0370222	0.116156	3	3	11314	04	134	105
69	day04	HMMR	-1.4079	5.89038e-09	0.0336667	0.107844	3	3	3161	04	134	105
70	day04	MCM4	-1.40383	2.0132e-10	0.0534	0.147467	3	3	4173	04	134	105
71	day04	LAMP3	-1.3538	3.79378e-06	0.0285556	0.0809556	3	3	27074	04	134	105
72	day04	IL2RB	-1.32567	3.97371e-21	0.130622	0.3234	3	3	3560	04	134	105
73	day04	GPI	-1.29679	7.23991e-55	0.287578	0.654111	3	3	2821	04	134	105
74	day04	TMEM97	-1.23286	8.90486e-08	0.0354667	0.103756	3	3	27346	04	134	105
75	day04	CCL4	-1.22864	9.14159e-05	0.0244667	0.0645556	3	3	6351	04	134	105
76	day04	ab-CD71	-1.22589	3.85725e-34	0.886867	0.936933	3	3	7037	04	134	105
77	day04	CD70	-1.20664	1.32171e-14	0.0932	0.238	3	3	970	04	134	105
78	day04	TYMS	-1.202	4.37621e-10	0.0766222	0.1794	3	3	7298	04	134	105
79	day04	CD79B	-1.19894	2.88789e-76	0.398	0.936111	3	3	974	04	134	105
80	day04	ITGAX	-1.16865	7.04752e-11	0.0862444	0.198489	3	3	3687	04	134	105
81	day04	ITGAL	-1.14398	3.69017e-43	0.296156	0.642022	3	3	3683	04	134	105
82	day04	CCND2	-1.12312	7.06876e-14	0.100178	0.244711	3	3	894	04	134	105
83	day04	FOSB	-1.11712	3.95893e-05	0.0352444	0.0838889	3	3	2354	04	134	105
84	day04	IGHA1-secreted	-1.11297	1.14949e-43	0.343644	0.662044	3	3	3493	04	134	105
85	day04	TK1	-1.09996	1.4233e-10	0.0984889	0.212667	3	3	7083	04	134	105
86	day04	TLR9	-1.0812	1.30772e-13	0.114778	0.260622	3	3	54106	04	134	105
87	day04	CD27	-1.06376	3.73369e-24	0.220244	0.456267	3	3	939	04	134	105
88	day04	TNFRSF17	-1.05654	2.72728e-12	0.101533	0.234822	3	3	608	04	134	105
89	day04	UBE2C	-1.04918	4.28939e-07	0.0439778	0.112422	3	3	11065	04	134	105
90	day04	GAB2	-1.04432	0.000270692	0.023	0.0595111	3	3	9846	04	134	105
91	day04	NKG7	-1.03506	6.94707e-07	0.0557111	0.127511	3	3	4818	04	134	105
92	day04	PTTG2	-1.02677	1.27368e-10	0.0931111	0.210756	3	3	10744	04	134	105
93	day04	PRDM1	-1.01396	4.84227e-08	0.0756444	0.164933	3	3	639	04	134	105
94	day04	CD320	-1.00645	1.0433e-11	0.0985333	0.227844	3	3	51293	04	134	105
95	day04	NFATC1	-0.990227	2.32015e-12	0.128511	0.271422	3	3	4772	04	134	105
96	day04	ab-CD56	-0.97416	9.10601e-15	0.669289	0.738267	3	3	4684	04	134	105
97	day04	PDIA4	-0.965339	3.94261e-14	0.167111	0.332333	3	3	9601	04	134	105
98	day04	CTSD	-0.952951	2.48078e-08	0.0803778	0.174511	3	3	1509	04	134	105
99	day04	GNAI2	-0.942357	2.52779e-32	0.334889	0.646111	3	3	2771	04	134	105
100	day04	IFITM3	-0.923407	1.68564e-59	0.477	0.850378	3	3	10410	04	134	105
101	day04	CASP3	-0.921508	1.66985e-15	0.182133	0.370178	3	3	836	04	134	105
102	day04	LGALS3	-0.895394	1.37585e-10	0.130133	0.260111	3	3	3958	04	134	105
103	day04	ICAM1	-0.893966	1.56932e-10	0.107978	0.232733	3	3	3383	04	134	105
104	day04	SEMA7A	-0.891836	1.81222e-06	0.0838444	0.162467	3	3	8482	04	134	105
105	day04	TNFRSF1B	-0.888027	1.91548e-15	0.183711	0.377978	3	3	7133	04	134	105
106	day04	ENTPD1	-0.872205	9.38293e-19	0.245533	0.4688	3	3	953	04	134	105
107	day04	IGHG3-secreted	-0.864144	8.66231e-12	0.1688	0.319	3	3	3502	04	134	105
108	day04	JUNB	-0.862763	8.8841e-13	0.173978	0.336978	3	3	3726	04	134	105
109	day04	IL15	-0.846304	3.59961e-05	0.0498	0.106356	3	3	3600	04	134	105
110	day04	HLA-DRB3	-0.840321	8.87744e-29	0.357822	0.622133	3	3	3125	04	134	105
111	day04	C10orf54	-0.83379	1.70547e-11	0.153422	0.304356	3	3	64115	04	134	105
112	day04	CD86	-0.830124	2.44175e-13	0.188556	0.360711	3	3	942	04	134	105
113	day04	AIM2	-0.826784	6.25961e-12	0.155622	0.309067	3	3	9447	04	134	105
114	day04	CD180	-0.826537	1.80993e-16	0.230889	0.447689	3	3	4064	04	134	105
115	day04	STAT3	-0.819557	2.24103e-17	0.244222	0.465533	3	3	6774	04	134	105
116	day04	CD82	-0.808613	6.74217e-11	0.162156	0.308244	3	3	3732	04	134	105
117	day04	ab-CD8	-0.80802	1.19482e-08	0.748578	0.7878	3	3	925	04	134	105
118	day04	JCHAIN	-0.800595	1.00307e-19	0.316267	0.542756	3	3	3512	04	134	105
119	day04	DUSP4	-0.767755	8.79269e-05	0.0649778	0.123156	3	3	1846	04	134	105
120	day04	VEGFA	-0.754381	4.83572e-05	0.0456222	0.100067	3	3	7422	04	134	105
121	day04	IL23R	-0.748825	2.37905e-17	0.324467	0.531956	3	3	149233	04	134	105
122	day04	TNFSF10	-0.747845	9.17555e-34	0.460489	0.741978	3	3	8743	04	134	105
123	day04	S100A4	-0.744328	1.86818e-17	0.305956	0.532578	3	3	6275	04	134	105
124	day04	MZB1	-0.743798	1.90097e-15	0.291467	0.492311	3	3	51237	04	134	105
125	day04	NAMPT	-0.741163	4.31538e-07	0.101489	0.195756	3	3	10135	04	134	105
126	day04	PFKP	-0.738101	5.00853e-15	0.266956	0.476267	3	3	5214	04	134	105
127	day04	LGALS9	-0.716118	7.52736e-34	0.494444	0.813356	3	3	3965	04	134	105
128	day04	TOP2A	-0.704762	3.21017e-05	0.0583333	0.119178	3	3	7153	04	134	105
129	day04	RNASE6	-0.684197	3.96488e-09	0.153933	0.288244	3	3	6039	04	134	105
130	day04	PCNA	-0.684091	3.12289e-07	0.179778	0.289467	3	3	5111	04	134	105
131	day04	DUSP2	-0.66346	5.92216e-08	0.17	0.289978	3	3	1844	04	134	105
132	day04	S100A10	-0.645729	1.5381e-17	0.395267	0.635822	3	3	6281	04	134	105
133	day04	CCNB1	-0.631849	0.000443063	0.0577111	0.107911	3	3	891	04	134	105
134	day04	XBP1	-0.631112	1.43772e-08	0.224489	0.360444	3	3	7494	04	134	105
135	day04	CD38	-0.628365	3.48916e-06	0.0900444	0.172978	3	3	952	04	134	105
136	day04	CD59	-0.617514	1.60601e-06	0.104289	0.196178	3	3	966	04	134	105
137	day04	CCR7	-0.608212	1.48662e-20	0.468333	0.700978	3	3	1236	04	134	105
138	day04	IL12RB1	-0.605273	1.42468e-06	0.132689	0.234844	3	3	3594	04	134	105
139	day04	ISG15	-0.601744	3.00228e-32	0.586022	0.860556	3	3	9636	04	134	105
140	day04	ab-CD183	-0.593503	2.78571e-19	0.9612	0.982233	2	2	2833	04	134	105
141	day04	CD58	-0.580622	4.36181e-06	0.0967778	0.182644	3	3	965	04	134	105
142	day04	STAT5A	-0.571264	4.17584e-09	0.254333	0.418756	3	3	6776	04	134	105
143	day04	FAS	-0.557662	2.64293e-05	0.0855333	0.157933	3	3	355	04	134	105
144	day04	OASL	-0.553759	8.46997e-08	0.190222	0.3258	3	3	8638	04	134	105
145	day04	ab-CD25	-0.541129	4.06559e-35	0.990067	0.996822	3	3	3559	04	134	105
146	day04	ab-CD27	-0.538511	3.22981e-12	0.9434	0.953578	3	3	939	04	134	105
147	day04	VPS28	-0.536872	7.31493e-10	0.3088	0.510178	3	3	51160	04	134	105
148	day04	KDELR1	-0.528001	6.14461e-06	0.149222	0.253644	3	3	10945	04	134	105
149	day04	IRF4	-0.522029	1.89447e-06	0.217511	0.337756	3	3	3662	04	134	105
150	day04	IGHG2-secreted	-0.511626	1.49518e-16	0.547756	0.7614	3	3	3501	04	134	105
151	day04	IL15RA	-0.508518	6.28094e-07	0.215111	0.347044	3	3	3601	04	134	105
152	day04	RPN2	-0.491794	3.00515e-07	0.307422	0.453422	3	3	6185	04	134	105
153	day04	CD37	-0.486571	1.19286e-16	0.658467	0.974867	3	3	951	04	134	105
154	day04	TBX21	-0.480446	0.000343774	0.139444	0.2132	3	3	30009	04	134	105
155	day04	LDHA	-0.468489	1.97958e-10	0.532	0.692767	2	2	3939	04	134	105
156	day04	ANXA5	-0.465226	8.98867e-07	0.303	0.450111	3	3	308	04	134	105
157	day04	TLR7	-0.460763	3.36696e-05	0.139022	0.231267	3	3	51284	04	134	105
158	day04	MCM2	-0.451278	0.000464885	0.1558	0.231356	3	3	4171	04	134	105
159	day04	CD81	-0.427169	2.75879e-07	0.609	0.883133	3	3	975	04	134	105
160	day04	IGHG1-secreted	-0.417186	1.83964e-13	0.614644	0.7942	3	3	3500	04	134	105
161	day04	CD24	-0.410826	2.90549e-06	0.357978	0.492889	3	3	100133941	04	134	105
162	day04	ITGB7	-0.39697	2.30282e-06	0.4002	0.575844	3	3	3695	04	134	105
163	day04	ALDOC	-0.392395	4.85379e-07	0.395844	0.569867	3	3	230	04	134	105
164	day04	LAP3	-0.391277	2.07362e-15	0.607867	0.759467	3	3	51056	04	134	105
165	day04	ab-CCR7	-0.345134	3.32593e-08	0.879267	0.921267	3	3	1236	04	134	105
166	day04	ab-CD39	-0.321075	7.82209e-32	0.999667	0.999644	3	3	953	04	134	105
167	day04	LAMP1	-0.31988	0.000272887	0.345222	0.482911	3	3	3916	04	134	105
168	day04	TPI1	-0.296272	4.07327e-14	0.740756	0.871067	3	3	7167	04	134	105
169	day04	PDIA6	-0.29411	0.00119235	0.431289	0.558178	3	3	10130	04	134	105
170	day04	DDIT4	-0.29197	0.000212716	0.418622	0.552733	3	3	54541	04	134	105
171	day04	IGHM-secreted	-0.289937	7.41802e-11	0.7278	0.864511	3	3	3507	04	134	105
172	day04	ENO1	-0.264358	1.01753e-12	0.779622	0.898467	3	3	2023	04	134	105
173	day04	GAPDH	-0.235639	1.89535e-45	0.934467	0.979111	3	3	2597	04	134	105
174	day04	POU2AF1	-0.225805	3.07096e-05	0.671089	0.787644	3	3	5450	04	134	105
175	day04	PGK1	-0.217548	5.2914e-07	0.732689	0.829067	3	3	5230	04	134	105
176	day04	ab-CD69	-0.168914	2.4866e-10	1	1	2	2	969	04	134	105
177	day04	IGKC	-0.166925	7.81174e-07	0.870578	0.937178	3	3	3514	04	134	105
178	day04	ab-CD38	-0.152491	1.23816e-10	1	1	3	3	952	04	134	105
179	day04	ab-CXCR5	-0.138568	3.51631e-11	0.9998	1	3	3	643	04	134	105
180	day04	ab-CD95	-0.0904844	2.14959e-06	1	1	2	2	355	04	134	105
181	day06-07	CCR2	-3.0534	2.80249e-09	0.00797778	0.0608889	3	3	729230	06-07	112	82
182	day06-07	CXCL10	-3.00058	8.60892e-14	0.0103111	0.0893556	3	3	3627	06-07	112	82
183	day06-07	MKI67	-2.90243	2.88512e-11	0.00688889	0.0691556	3	3	4288	06-07	112	82
184	day06-07	IGHG4-secreted	-2.88259	3.99846e-31	0.0305111	0.214311	3	3	3503	06-07	112	82
185	day06-07	AURKB	-2.68313	3.9075e-16	0.0125778	0.106556	3	3	9212	06-07	112	82
186	day06-07	IL32	-2.49698	2.04253e-44	0.0505778	0.314111	3	3	9235	06-07	112	82
187	day06-07	ab-CD89	-2.34357	3.32422e-08	0.653022	0.663689	3	3	2204	06-07	112	82
188	day06-07	LILRB4	-2.29213	1.09333e-07	0.00815556	0.0533556	3	3	11006	06-07	112	82
189	day06-07	LAG3	-2.26405	3.17301e-23	0.0384	0.192311	3	3	3902	06-07	112	82
190	day06-07	KIAA0101	-2.16491	8.63525e-18	0.0236222	0.1388	3	3	9768	06-07	112	82
191	day06-07	LGALS1	-2.15265	1.41308e-72	0.134333	0.544089	3	3	3956	06-07	112	82
192	day06-07	UBE2C	-1.99144	2.34025e-11	0.0156222	0.0886	3	3	11065	06-07	112	82
193	day06-07	SELPLG	-1.848	8.38128e-29	0.0599111	0.261711	3	3	6404	06-07	112	82
194	day06-07	ab-CD71	-1.68881	1.53595e-48	0.814956	0.916089	3	3	7037	06-07	112	82
195	day06-07	CCR10	-1.63448	7.7666e-07	0.0194	0.0699556	3	3	2826	06-07	112	82
196	day06-07	CD70	-1.60496	4.22846e-29	0.0878	0.312244	3	3	970	06-07	112	82
197	day06-07	PRDM1	-1.47773	1.59367e-23	0.0819556	0.273444	3	3	639	06-07	112	82
198	day06-07	TNFRSF17	-1.46671	6.31712e-25	0.0932667	0.300222	3	3	608	06-07	112	82
199	day06-07	CCR1	-1.44501	5.9094e-09	0.0262	0.0952667	3	3	1230	06-07	112	82
200	day06-07	PDIA4	-1.43227	2.96587e-28	0.1298	0.368111	3	3	9601	06-07	112	82
201	day06-07	LGALS3	-1.40997	3.55061e-29	0.118933	0.3616	3	3	3958	06-07	112	82
202	day06-07	MCM4	-1.37749	2.67968e-09	0.0269333	0.0982889	3	3	4173	06-07	112	82
203	day06-07	CD320	-1.37721	4.98109e-23	0.0798222	0.269222	3	3	51293	06-07	112	82
204	day06-07	CXCR3	-1.35059	3.97996e-24	0.1028	0.311044	3	3	2833	06-07	112	82
205	day06-07	CD27	-1.33846	4.33051e-42	0.209756	0.546133	3	3	939	06-07	112	82
206	day06-07	CD300A	-1.31994	5.81615e-11	0.0501111	0.147267	3	3	11314	06-07	112	82
207	day06-07	TYMS	-1.28962	7.20198e-12	0.0446889	0.1454	3	3	7298	06-07	112	82
208	day06-07	LRRC32	-1.27283	4.02416e-05	0.0309556	0.0766889	3	3	2615	06-07	112	82
209	day06-07	C10orf54	-1.26866	4.43899e-27	0.118511	0.356467	3	3	64115	06-07	112	82
210	day06-07	TOP2A	-1.25688	3.26561e-09	0.0263556	0.0972	3	3	7153	06-07	112	82
211	day06-07	IL2RA	-1.24769	1.06812e-08	0.0476	0.127778	3	3	3559	06-07	112	82
212	day06-07	BLK	-1.16354	1.05628e-09	0.0831333	0.183222	3	3	640	06-07	112	82
213	day06-07	IL2RB	-1.15853	1.06059e-21	0.115378	0.320022	3	3	3560	06-07	112	82
214	day06-07	GPI	-1.14968	4.61913e-64	0.3664	0.800489	3	3	2821	06-07	112	82
215	day06-07	IGHG3-secreted	-1.14089	1.1849e-22	0.180556	0.396133	3	3	3502	06-07	112	82
216	day06-07	HMMR	-1.13869	2.68769e-07	0.0188	0.0720889	3	3	3161	06-07	112	82
217	day06-07	XBP1	-1.13754	2.03276e-29	0.224244	0.4826	3	3	7494	06-07	112	82
218	day06-07	TK1	-1.09737	1.78659e-10	0.0532	0.150889	3	3	7083	06-07	112	82
219	day06-07	ITGAL	-1.06043	7.41858e-33	0.238956	0.565022	3	3	3683	06-07	112	82
220	day06-07	CD79B	-1.05559	3.56546e-61	0.386311	0.911067	3	3	974	06-07	112	82
221	day06-07	ab-CD56	-1.04102	4.62372e-14	0.696733	0.759667	3	3	4684	06-07	112	82
222	day06-07	TNFRSF13B	-1.02394	0.000114789	0.0612	0.130633	2	2	23495	06-07	112	82
223	day06-07	CTSD	-1.01634	1.15887e-10	0.0893778	0.203933	3	3	1509	06-07	112	82
224	day06-07	IGHG1-membrane	-1.0005	1.16617e-11	0.100156	0.227333	3	3	3500	06-07	112	82
225	day06-07	CD59	-0.998317	5.10078e-15	0.0809556	0.226378	3	3	966	06-07	112	82
226	day06-07	JCHAIN	-0.981167	1.79757e-50	0.436889	0.731711	3	3	3512	06-07	112	82
227	day06-07	TNFRSF1B	-0.98087	2.99901e-17	0.135644	0.322978	3	3	7133	06-07	112	82
228	day06-07	IGHA1-secreted	-0.959138	1.28344e-43	0.4314	0.770578	3	3	3493	06-07	112	82
229	day06-07	PTTG2	-0.923674	2.28964e-11	0.0702889	0.185333	3	3	10744	06-07	112	82
230	day06-07	ab-CD8	-0.909215	2.58562e-16	0.767422	0.822489	3	3	925	06-07	112	82
231	day06-07	RNASE6	-0.904926	3.61779e-17	0.126956	0.317289	3	3	6039	06-07	112	82
232	day06-07	IL15	-0.903905	3.2111e-06	0.0408667	0.101489	3	3	3600	06-07	112	82
233	day06-07	MZB1	-0.899654	1.25762e-27	0.316311	0.586089	3	3	51237	06-07	112	82
234	day06-07	ab-IgG	-0.893424	1.24031e-05	0.607422	0.674733	3	3	3500	06-07	112	82
235	day06-07	CCL4	-0.887341	0.000168136	0.0253333	0.0642667	3	3	6351	06-07	112	82
236	day06-07	CASP3	-0.86304	8.54764e-17	0.141467	0.334711	3	3	836	06-07	112	82
237	day06-07	CCNB1	-0.85776	9.19959e-07	0.0296222	0.0877111	3	3	891	06-07	112	82
238	day06-07	HLA-DRB3	-0.838838	3.3284e-24	0.316022	0.556489	3	3	3125	06-07	112	82
239	day06-07	AIM2	-0.832391	1.33115e-13	0.128378	0.287356	3	3	9447	06-07	112	82
240	day06-07	ab-CD27	-0.827111	8.8151e-32	0.9776	0.980089	3	3	939	06-07	112	82
241	day06-07	CCND2	-0.825353	7.64264e-14	0.106289	0.261333	3	3	894	06-07	112	82
242	day06-07	NFATC1	-0.730659	4.33368e-07	0.118244	0.215044	3	3	4772	06-07	112	82
243	day06-07	ICAM1	-0.698865	2.14974e-08	0.0808667	0.179356	3	3	3383	06-07	112	82
244	day06-07	STAT3	-0.696271	1.11402e-14	0.207911	0.4102	3	3	6774	06-07	112	82
245	day06-07	CD58	-0.695138	2.02504e-07	0.0698889	0.155222	3	3	965	06-07	112	82
246	day06-07	ab-CD11c	-0.664825	6.10842e-08	0.862967	0.891467	2	2	3687	06-07	112	82
247	day06-07	CD82	-0.653528	1.34025e-06	0.129222	0.225844	3	3	3732	06-07	112	82
248	day06-07	TLR9	-0.651213	1.81383e-06	0.0852889	0.167667	3	3	54106	06-07	112	82
249	day06-07	TMEM97	-0.640696	8.98895e-05	0.0262444	0.0687778	3	3	27346	06-07	112	82
250	day06-07	ab-CD183	-0.635553	6.1407e-21	0.956267	0.9832	2	2	2833	06-07	112	82
251	day06-07	ab-TCR-gamma-delta	-0.631149	0.00037257	0.8648	0.881111	3	3	28526	06-07	112	82
252	day06-07	IRF4	-0.627733	1.78703e-11	0.22	0.400689	3	3	3662	06-07	112	82
253	day06-07	CD38	-0.610795	1.26537e-09	0.0953333	0.211689	3	3	952	06-07	112	82
254	day06-07	ANXA5	-0.609314	6.58981e-13	0.258022	0.475089	3	3	308	06-07	112	82
255	day06-07	IGHG2-secreted	-0.607086	5.37387e-27	0.591156	0.841933	3	3	3501	06-07	112	82
256	day06-07	CD86	-0.594466	4.414e-08	0.151267	0.272422	3	3	942	06-07	112	82
257	day06-07	SLC1A5	-0.583027	0.000462365	0.163	0.253033	2	2	6510	06-07	112	82
258	day06-07	GNAI2	-0.564915	8.59934e-14	0.324911	0.5706	3	3	2771	06-07	112	82
259	day06-07	IGHG1-secreted	-0.556697	2.25776e-22	0.596911	0.812711	3	3	3500	06-07	112	82
260	day06-07	RPN2	-0.554305	9.8698e-10	0.274022	0.463356	3	3	6185	06-07	112	82
261	day06-07	CD180	-0.529289	6.68587e-11	0.227467	0.415156	3	3	4064	06-07	112	82
262	day06-07	IFITM3	-0.520992	1.99169e-14	0.371711	0.619533	3	3	10410	06-07	112	82
263	day06-07	S100A4	-0.4999	9.02702e-10	0.296844	0.488889	3	3	6275	06-07	112	82
264	day06-07	ENTPD1	-0.476698	1.21076e-08	0.170267	0.313422	3	3	953	06-07	112	82
265	day06-07	ab-CD25	-0.464956	2.97234e-32	0.992556	0.999244	3	3	3559	06-07	112	82
266	day06-07	LDHA	-0.463426	7.47159e-17	0.6388	0.813267	2	2	3939	06-07	112	82
267	day06-07	PCNA	-0.461135	6.63961e-06	0.113689	0.204444	3	3	5111	06-07	112	82
268	day06-07	ab-CD45RO	-0.457074	8.84434e-07	0.770022	0.841356	3	3	5788	06-07	112	82
269	day06-07	S100A10	-0.448493	3.33063e-10	0.379044	0.587111	3	3	6281	06-07	112	82
270	day06-07	IL23R	-0.427726	2.95924e-08	0.333044	0.522578	3	3	149233	06-07	112	82
271	day06-07	ISG15	-0.420884	1.12446e-07	0.477	0.702711	3	3	9636	06-07	112	82
272	day06-07	KDELR1	-0.409226	2.13265e-08	0.2116	0.373711	3	3	10945	06-07	112	82
273	day06-07	NAMPT	-0.390997	0.000683517	0.0970222	0.1596	3	3	10135	06-07	112	82
274	day06-07	ab-CD39	-0.379762	2.13184e-42	0.9996	0.999822	3	3	953	06-07	112	82
275	day06-07	LGALS9	-0.378595	7.24772e-09	0.426933	0.636911	3	3	3965	06-07	112	82
276	day06-07	MCM2	-0.368509	4.74487e-05	0.115444	0.198956	3	3	4171	06-07	112	82
277	day06-07	CD81	-0.367224	5.32005e-07	0.544	0.822622	3	3	975	06-07	112	82
278	day06-07	CD63	-0.350309	2.1381e-06	0.433978	0.647867	3	3	967	06-07	112	82
279	day06-07	PDIA6	-0.346075	1.74391e-05	0.348533	0.524578	3	3	10130	06-07	112	82
280	day06-07	IL12RB1	-0.337364	0.000401618	0.0781778	0.137733	3	3	3594	06-07	112	82
281	day06-07	ab-CD38	-0.315055	9.35325e-28	1	1	3	3	952	06-07	112	82
282	day06-07	CD37	-0.313778	1.10758e-08	0.662422	0.9516	3	3	951	06-07	112	82
283	day06-07	VPS28	-0.292409	1.09899e-05	0.267067	0.4128	3	3	51160	06-07	112	82
284	day06-07	LAP3	-0.291625	0.000347801	0.471244	0.620911	3	3	51056	06-07	112	82
285	day06-07	IGHM-secreted	-0.290587	3.46897e-11	0.735133	0.859	3	3	3507	06-07	112	82
286	day06-07	ab-CD69	-0.263085	1.29157e-19	1	1	2	2	969	06-07	112	82
287	day06-07	TNFSF10	-0.262128	4.72494e-05	0.401222	0.562444	3	3	8743	06-07	112	82
288	day06-07	IL15RA	-0.254273	0.00022761	0.185511	0.282622	3	3	3601	06-07	112	82
289	day06-07	IGKC	-0.177449	1.69973e-10	0.883067	0.944556	3	3	3514	06-07	112	82
290	day06-07	ab-CD95	-0.132861	1.66462e-14	1	1	2	2	355	06-07	112	82
291	day06-07	GAPDH	-0.0889691	1.37585e-06	0.950356	0.975622	3	3	2597	06-07	112	82
292	day06-07	ab-CD45	-0.0349362	0.000267883	1	1	2	2	5788	06-07	112	82
293	day07-08	CXCL10	-3.10059	9.98043e-15	0.0116889	0.0968667	3	3	3627	07-08	109	81
294	day07-08	IGHG4-secreted	-2.77642	2.46493e-28	0.0305111	0.201778	3	3	3503	07-08	109	81
295	day07-08	MKI67	-2.70882	1.09099e-06	0.00526667	0.0418222	3	3	4288	07-08	109	81
296	day07-08	IL32	-2.65801	4.08183e-47	0.0508889	0.323467	3	3	9235	07-08	109	81
297	day07-08	CCR2	-2.56542	1.77475e-12	0.0128444	0.0883556	3	3	729230	07-08	109	81
298	day07-08	LAG3	-2.42044	3.49331e-25	0.0373333	0.199689	3	3	3902	07-08	109	81
299	day07-08	ab-CD89	-2.29194	1.77916e-08	0.645489	0.663689	3	3	2204	07-08	109	81
300	day07-08	LGALS1	-2.05635	1.67327e-66	0.133933	0.530356	3	3	3956	07-08	109	81
301	day07-08	AURKB	-1.97851	2.83397e-08	0.0125778	0.0657556	3	3	9212	07-08	109	81
302	day07-08	SELPLG	-1.92627	2.97249e-25	0.0580444	0.237889	3	3	6404	07-08	109	81
303	day07-08	CD70	-1.64235	1.44183e-29	0.0885778	0.314178	3	3	970	07-08	109	81
304	day07-08	UBE2C	-1.62863	1.04257e-07	0.0139778	0.0655778	3	3	11065	07-08	109	81
305	day07-08	ab-CD71	-1.54469	2.214e-48	0.814867	0.916089	3	3	7037	07-08	109	81
306	day07-08	CCR1	-1.48154	6.17585e-09	0.0261778	0.0951778	3	3	1230	07-08	109	81
307	day07-08	LILRB4	-1.44929	0.000201077	0.00942222	0.0377111	3	3	11006	07-08	109	81
308	day07-08	IL2RA	-1.41838	2.26277e-09	0.0439111	0.126289	3	3	3559	07-08	109	81
309	day07-08	LRRC32	-1.40539	3.6847e-06	0.0313556	0.0848889	3	3	2615	07-08	109	81
310	day07-08	KIAA0101	-1.40266	1.25939e-07	0.0220889	0.0801333	3	3	9768	07-08	109	81
311	day07-08	LGALS3	-1.40229	2.44471e-27	0.118156	0.348022	3	3	3958	07-08	109	81
312	day07-08	CD320	-1.36892	4.34957e-22	0.0804889	0.2652	3	3	51293	07-08	109	81
313	day07-08	PRDM1	-1.26355	3.90459e-20	0.0898	0.268378	3	3	639	07-08	109	81
314	day07-08	CCR10	-1.24633	0.000374254	0.0188667	0.0517333	3	3	2826	07-08	109	81
315	day07-08	CCL22	-1.22591	0.000522644	0.0209556	0.0539333	3	3	6367	07-08	109	81
316	day07-08	PDIA4	-1.21784	1.94586e-23	0.1314	0.353156	3	3	9601	07-08	109	81
317	day07-08	CXCR3	-1.20213	4.80668e-19	0.101911	0.2812	3	3	2833	07-08	109	81
318	day07-08	CD27	-1.19187	7.07688e-35	0.2248	0.534089	3	3	939	07-08	109	81
319	day07-08	BLK	-1.17845	6.3426e-10	0.0831333	0.185156	3	3	640	07-08	109	81
320	day07-08	TNFRSF17	-1.16568	1.21275e-17	0.0996	0.269756	3	3	608	07-08	109	81
321	day07-08	C10orf54	-1.14338	9.15981e-23	0.118511	0.332911	3	3	64115	07-08	109	81
322	day07-08	GPI	-1.13814	2.77496e-63	0.364511	0.788133	3	3	2821	07-08	109	81
323	day07-08	IGHG3-secreted	-1.13636	3.04761e-23	0.1808	0.401644	3	3	3502	07-08	109	81
324	day07-08	TYMS	-1.12194	8.30619e-08	0.0382	0.108156	3	3	7298	07-08	109	81
325	day07-08	IL2RB	-1.10675	1.1704e-18	0.116067	0.300044	3	3	3560	07-08	109	81
326	day07-08	ab-CD56	-1.06389	1.69953e-15	0.701044	0.765578	3	3	4684	07-08	109	81
327	day07-08	CD300A	-1.04675	1.47916e-08	0.0567333	0.142467	3	3	11314	07-08	109	81
328	day07-08	RNASE6	-1.03493	3.7569e-19	0.1186	0.313556	3	3	6039	07-08	109	81
329	day07-08	TNFRSF13B	-1.02394	0.00012262	0.0612	0.130633	2	2	23495	07-08	109	81
330	day07-08	ITGAX	-1.02381	7.72564e-06	0.0577778	0.120667	3	3	3687	07-08	109	81
331	day07-08	CD79B	-1.01751	1.89328e-57	0.393178	0.905356	3	3	974	07-08	109	81
332	day07-08	TK1	-0.987347	1.58989e-06	0.0430444	0.107022	3	3	7083	07-08	109	81
333	day07-08	HMMR	-0.985552	0.00010648	0.0180667	0.0544667	3	3	3161	07-08	109	81
334	day07-08	CTSD	-0.980849	6.03058e-10	0.0893778	0.198978	3	3	1509	07-08	109	81
335	day07-08	ITGAL	-0.978397	7.80485e-28	0.239378	0.538089	3	3	3683	07-08	109	81
336	day07-08	IGHA1-secreted	-0.971265	2.33168e-45	0.432756	0.769511	3	3	3493	07-08	109	81
337	day07-08	MCM4	-0.969361	1.60789e-05	0.0258667	0.0731778	3	3	4173	07-08	109	81
338	day07-08	IL15	-0.965729	2.08171e-06	0.0408667	0.103044	3	3	3600	07-08	109	81
339	day07-08	CD3E	-0.946368	0.000384434	0.0132222	0.0428	3	3	916	07-08	109	81
340	day07-08	XBP1	-0.932146	1.37697e-21	0.2416	0.478467	3	3	7494	07-08	109	81
341	day07-08	AIM2	-0.926397	1.3304e-14	0.124333	0.285911	3	3	9447	07-08	109	81
342	day07-08	TNFRSF1B	-0.923503	2.8703e-14	0.134444	0.298889	3	3	7133	07-08	109	81
343	day07-08	IGHG1-membrane	-0.918283	8.48449e-10	0.100156	0.213111	3	3	3500	07-08	109	81
344	day07-08	CD59	-0.902958	5.78419e-13	0.0901556	0.226489	3	3	966	07-08	109	81
345	day07-08	JCHAIN	-0.897578	4.568e-44	0.456111	0.731556	3	3	3512	07-08	109	81
346	day07-08	ab-CD8	-0.894524	4.71674e-15	0.766067	0.824867	3	3	925	07-08	109	81
347	day07-08	ICAM1	-0.886593	2.51505e-09	0.0766889	0.179	3	3	3383	07-08	109	81
348	day07-08	HLA-DRB3	-0.828648	1.26131e-23	0.318067	0.557133	3	3	3125	07-08	109	81
349	day07-08	MZB1	-0.817076	2.24531e-21	0.316267	0.575511	3	3	51237	07-08	109	81
350	day07-08	NFATC1	-0.800022	6.72895e-08	0.117044	0.220444	3	3	4772	07-08	109	81
351	day07-08	ab-CD27	-0.791682	2.94791e-31	0.9776	0.979644	3	3	939	07-08	109	81
352	day07-08	ab-TCR-gamma-delta	-0.728245	0.000117414	0.864111	0.879756	3	3	28526	07-08	109	81
353	day07-08	STAT3	-0.722238	1.41016e-15	0.209356	0.417356	3	3	6774	07-08	109	81
354	day07-08	CCL5	-0.718452	0.000170017	0.0472	0.0966	3	3	6352	07-08	109	81
355	day07-08	TOP2A	-0.707319	0.000916951	0.0241333	0.0573778	3	3	7153	07-08	109	81
356	day07-08	CASP3	-0.705389	4.15843e-12	0.142156	0.300044	3	3	836	07-08	109	81
357	day07-08	CCND2	-0.683536	6.88372e-10	0.108578	0.232511	3	3	894	07-08	109	81
358	day07-08	CD82	-0.67873	1.59665e-06	0.127133	0.222111	3	3	3732	07-08	109	81
359	day07-08	ab-CD11c	-0.664825	6.74858e-08	0.862967	0.891467	2	2	3687	07-08	109	81
360	day07-08	CD86	-0.658238	8.02128e-08	0.139822	0.252156	3	3	942	07-08	109	81
361	day07-08	ab-CD183	-0.635553	7.00579e-21	0.956267	0.9832	2	2	2833	07-08	109	81
362	day07-08	TLR9	-0.626506	2.41239e-05	0.0852889	0.156489	3	3	54106	07-08	109	81
363	day07-08	ENTPD1	-0.623411	6.91354e-10	0.149422	0.289689	3	3	953	07-08	109	81
364	day07-08	SLC1A5	-0.583027	0.000489224	0.163	0.253033	2	2	6510	07-08	109	81
365	day07-08	IGHG2-secreted	-0.578417	2.30595e-25	0.5992	0.841778	3	3	3501	07-08	109	81
366	day07-08	IGHG1-secreted	-0.576566	1.53656e-22	0.576356	0.803022	3	3	3500	07-08	109	81
367	day07-08	PTTG2	-0.5527	4.57672e-06	0.0700889	0.144644	3	3	10744	07-08	109	81
368	day07-08	GNAI2	-0.552507	8.17137e-14	0.319844	0.5642	3	3	2771	07-08	109	81
369	day07-08	IFITM3	-0.548224	1.86572e-15	0.365778	0.617067	3	3	10410	07-08	109	81
370	day07-08	CD58	-0.526273	2.07961e-05	0.0739333	0.144022	3	3	965	07-08	109	81
371	day07-08	IRF4	-0.525711	7.52722e-10	0.224956	0.398111	3	3	3662	07-08	109	81
372	day07-08	ANXA5	-0.507992	1.32375e-10	0.258044	0.452733	3	3	308	07-08	109	81
373	day07-08	IL23R	-0.50303	2.35563e-10	0.329444	0.527822	3	3	149233	07-08	109	81
374	day07-08	CD38	-0.492597	2.17907e-07	0.0955111	0.193267	3	3	952	07-08	109	81
375	day07-08	ab-CD25	-0.491028	1.09853e-33	0.992556	0.999244	3	3	3559	07-08	109	81
376	day07-08	RPN2	-0.473117	2.4783e-08	0.2672	0.4476	3	3	6185	07-08	109	81
377	day07-08	S100A10	-0.471327	4.96374e-10	0.355644	0.5504	3	3	6281	07-08	109	81
378	day07-08	CD180	-0.465062	3.51439e-09	0.227422	0.399844	3	3	4064	07-08	109	81
379	day07-08	LDHA	-0.463426	8.24387e-17	0.6388	0.813267	2	2	3939	07-08	109	81
380	day07-08	ab-CD45RO	-0.456034	3.05829e-06	0.770222	0.841933	3	3	5788	07-08	109	81
381	day07-08	S100A4	-0.43925	2.53059e-08	0.326311	0.517489	3	3	6275	07-08	109	81
382	day07-08	IL15RA	-0.416941	1.84928e-06	0.170311	0.286422	3	3	3601	07-08	109	81
383	day07-08	KDELR1	-0.389632	6.79388e-08	0.203689	0.354378	3	3	10945	07-08	109	81
384	day07-08	ab-CD39	-0.385641	1.49007e-43	0.9996	0.999822	3	3	953	07-08	109	81
385	day07-08	CD63	-0.374708	4.62858e-07	0.4366	0.647111	3	3	967	07-08	109	81
386	day07-08	ISG15	-0.363939	1.39031e-05	0.476311	0.694578	3	3	9636	07-08	109	81
387	day07-08	PASK	-0.33261	0.000732655	0.104	0.1698	3	3	23178	07-08	109	81
388	day07-08	LGALS9	-0.327728	2.60357e-07	0.426089	0.621444	3	3	3965	07-08	109	81
389	day07-08	PFKP	-0.316868	1.01839e-05	0.341511	0.497511	3	3	5214	07-08	109	81
390	day07-08	VPS28	-0.316102	1.96724e-06	0.263133	0.415711	3	3	51160	07-08	109	81
391	day07-08	CD37	-0.311697	2.58121e-08	0.659156	0.951644	3	3	951	07-08	109	81
392	day07-08	CD81	-0.306347	2.25697e-05	0.5468	0.804756	3	3	975	07-08	109	81
393	day07-08	ab-CD38	-0.296959	2.26128e-23	1	1	3	3	952	07-08	109	81
394	day07-08	TNFSF10	-0.271736	4.59482e-05	0.404289	0.567333	3	3	8743	07-08	109	81
395	day07-08	ab-CD69	-0.263085	1.45319e-19	1	1	2	2	969	07-08	109	81
396	day07-08	VEGFA	-0.262554	0.00132602	0.165267	0.244133	3	3	7422	07-08	109	81
397	day07-08	IGHM-secreted	-0.253887	8.44472e-10	0.763844	0.8632	3	3	3507	07-08	109	81
398	day07-08	IGKC	-0.168368	5.86129e-09	0.883311	0.944044	3	3	3514	07-08	109	81
399	day07-08	ab-CD95	-0.132861	1.81443e-14	1	1	2	2	355	07-08	109	81
400	day07-08	GAPDH	-0.0906427	3.528e-06	0.935733	0.969289	3	3	2597	07-08	109	81
401	day07-08	ab-CD45	-0.0349362	0.00028453	1	1	2	2	5788	07-08	109	81
402	day10	CCR2	-3.85761	3.17385e-18	0.00551111	0.100111	3	3	729230	10	91	68
403	day10	IGHG4-secreted	-2.86233	2.88253e-30	0.0277556	0.205533	3	3	3503	10	91	68
404	day10	CXCL10	-2.63554	6.15729e-11	0.0144444	0.0832	3	3	3627	10	91	68
405	day10	LAG3	-2.36681	4.08733e-26	0.0335778	0.198667	3	3	3902	10	91	68
406	day10	ab-CD89	-2.3021	7.53029e-08	0.669311	0.671178	3	3	2204	10	91	68
407	day10	IL32	-2.30011	2.27103e-39	0.0593333	0.306489	3	3	9235	10	91	68
408	day10	LGALS1	-2.27509	2.30259e-67	0.0997556	0.491044	3	3	3956	10	91	68
409	day10	SELPLG	-1.9031	3.16634e-26	0.0426444	0.218133	3	3	6404	10	91	68
410	day10	CCR1	-1.73973	5.31293e-13	0.0282667	0.121978	3	3	1230	10	91	68
411	day10	CCR10	-1.6827	1.01788e-05	0.0159778	0.0570667	3	3	2826	10	91	68
412	day10	IL2RA	-1.62182	1.41638e-08	0.0288	0.0967333	3	3	3559	10	91	68
413	day10	PRDM1	-1.61909	6.06932e-24	0.0562	0.232978	3	3	639	10	91	68
414	day10	CCL22	-1.61341	1.7984e-05	0.0167111	0.0569556	3	3	6367	10	91	68
415	day10	GZMB	-1.61127	1.91206e-06	0.0126667	0.0557333	3	3	3002	10	91	68
416	day10	LGALS3	-1.59535	1.21959e-30	0.0758222	0.303556	3	3	3958	10	91	68
417	day10	LILRB4	-1.57116	0.000534143	0.00582222	0.0286667	3	3	11006	10	91	68
418	day10	CD70	-1.47875	7.19588e-24	0.0772444	0.269667	3	3	970	10	91	68
419	day10	IGHG3-secreted	-1.4737	3.66484e-30	0.137467	0.378378	3	3	3502	10	91	68
420	day10	CD27	-1.47339	8.86528e-52	0.199022	0.5802	3	3	939	10	91	68
421	day10	ab-CD71	-1.44633	2.8412e-32	0.789022	0.875911	3	3	7037	10	91	68
422	day10	ITGAX	-1.37369	5.10762e-10	0.058	0.150778	3	3	3687	10	91	68
423	day10	PDIA4	-1.22709	1.3075e-23	0.112	0.328	3	3	9601	10	91	68
424	day10	CD320	-1.15242	2.66888e-19	0.0836889	0.257	3	3	51293	10	91	68
425	day10	C10orf54	-1.1177	9.82728e-25	0.121667	0.354156	3	3	64115	10	91	68
426	day10	KIAA0101	-1.05748	0.000147614	0.0164222	0.0507778	3	3	9768	10	91	68
427	day10	XBP1	-1.05387	6.93495e-25	0.214556	0.4684	3	3	7494	10	91	68
428	day10	RNASE6	-1.04676	4.86635e-21	0.111689	0.319511	3	3	6039	10	91	68
429	day10	IGHG1-membrane	-1.04491	1.04757e-12	0.0992	0.234533	3	3	3500	10	91	68
430	day10	CD79B	-1.03446	2.12191e-62	0.396222	0.919533	3	3	974	10	91	68
431	day10	JCHAIN	-1.03436	5.174e-41	0.375267	0.655022	3	3	3512	10	91	68
432	day10	CXCR3	-1.03236	7.72923e-17	0.115822	0.290378	3	3	2833	10	91	68
433	day10	ITGAL	-1.02907	1.4591e-32	0.227444	0.556422	3	3	3683	10	91	68
434	day10	IL2RB	-1.02116	1.3987e-14	0.0976444	0.247311	3	3	3560	10	91	68
435	day10	TNFRSF17	-1.01779	7.0408e-15	0.0837556	0.230444	3	3	608	10	91	68
436	day10	ab-CD27	-1.0015	8.15599e-42	0.949222	0.971	3	3	939	10	91	68
437	day10	GPI	-0.985978	6.1769e-40	0.329956	0.706933	3	3	2821	10	91	68
438	day10	ab-CD56	-0.97121	3.52719e-22	0.784711	0.842889	3	3	4684	10	91	68
439	day10	MZB1	-0.957167	1.655e-28	0.294556	0.606711	3	3	51237	10	91	68
440	day10	TYMS	-0.937784	0.000410179	0.0278444	0.0651778	3	3	7298	10	91	68
441	day10	CTSD	-0.930132	1.01164e-09	0.0735111	0.176533	3	3	1509	10	91	68
442	day10	CD300A	-0.906711	3.45558e-08	0.0593333	0.144867	3	3	11314	10	91	68
443	day10	CCL4	-0.891303	3.77356e-05	0.0168667	0.0555111	3	3	6351	10	91	68
444	day10	ab-CD8	-0.822084	6.25667e-13	0.860422	0.871489	3	3	925	10	91	68
445	day10	IGHA1-secreted	-0.776213	4.49688e-29	0.455244	0.772778	3	3	3493	10	91	68
446	day10	ab-IgG	-0.7689	8.31507e-06	0.648067	0.708422	3	3	3500	10	91	68
447	day10	CD82	-0.763078	1.51103e-08	0.138822	0.255267	3	3	3732	10	91	68
448	day10	HLA-DRB3	-0.75496	6.1269e-22	0.329156	0.567289	3	3	3125	10	91	68
449	day10	TK1	-0.739982	0.00105882	0.0335778	0.0711778	3	3	7083	10	91	68
450	day10	AIM2	-0.739453	7.38123e-11	0.1162	0.250556	3	3	9447	10	91	68
451	day10	ab-TCR-gamma-delta	-0.690146	2.03241e-07	0.900844	0.915533	3	3	28526	10	91	68
452	day10	ab-CD183	-0.689693	7.20359e-27	0.973633	0.993033	2	2	2833	10	91	68
453	day10	ICAM1	-0.673843	5.48453e-07	0.0805556	0.167733	3	3	3383	10	91	68
454	day10	ab-CD11c	-0.671033	2.59052e-09	0.895933	0.921267	2	2	3687	10	91	68
455	day10	CD38	-0.647577	8.35458e-08	0.0722222	0.162311	3	3	952	10	91	68
456	day10	TNFRSF1B	-0.61792	1.79646e-07	0.111089	0.216533	3	3	7133	10	91	68
457	day10	IGHG2-secreted	-0.605421	7.97629e-30	0.618111	0.856111	3	3	3501	10	91	68
458	day10	IGHG1-secreted	-0.59543	7.26054e-26	0.595933	0.818222	3	3	3500	10	91	68
459	day10	CASP3	-0.577609	3.915e-10	0.127133	0.264578	3	3	836	10	91	68
460	day10	IFITM3	-0.564691	7.55844e-22	0.456867	0.766756	3	3	10410	10	91	68
461	day10	CD180	-0.561494	6.24885e-11	0.188267	0.362778	3	3	4064	10	91	68
462	day10	ISG15	-0.55065	4.45109e-18	0.554822	0.889089	3	3	9636	10	91	68
463	day10	CD59	-0.550155	4.85662e-09	0.0805111	0.187467	3	3	966	10	91	68
464	day10	ENTPD1	-0.545179	9.6471e-10	0.162	0.311867	3	3	953	10	91	68
465	day10	GNAI2	-0.523855	1.74245e-12	0.292289	0.524422	3	3	2771	10	91	68
466	day10	ab-CD45RO	-0.519658	6.35112e-09	0.809667	0.881111	3	3	5788	10	91	68
467	day10	IL23R	-0.515538	2.15125e-11	0.295667	0.505511	3	3	149233	10	91	68
468	day10	RPN2	-0.513114	2.99058e-10	0.216267	0.4006	3	3	6185	10	91	68
469	day10	STAT3	-0.510994	6.41567e-09	0.207	0.359822	3	3	6774	10	91	68
470	day10	ab-CD25	-0.471039	9.39584e-30	0.991667	0.997756	3	3	3559	10	91	68
471	day10	CD86	-0.454443	4.42928e-05	0.144133	0.233444	3	3	942	10	91	68
472	day10	ab-CD39	-0.42779	6.99159e-55	0.999778	1	3	3	953	10	91	68
473	day10	LGALS9	-0.410497	1.09915e-10	0.443822	0.683289	3	3	3965	10	91	68
474	day10	STAT5A	-0.402597	0.000644988	0.164044	0.241933	3	3	6776	10	91	68
475	day10	TNFSF10	-0.392412	1.0883e-09	0.434311	0.653533	3	3	8743	10	91	68
476	day10	OASL	-0.352437	9.18855e-06	0.121422	0.216644	3	3	8638	10	91	68
477	day10	S100A10	-0.321362	4.35222e-06	0.357667	0.520778	3	3	6281	10	91	68
478	day10	CCND2	-0.312621	4.61666e-05	0.0959333	0.174244	3	3	894	10	91	68
479	day10	ab-CD38	-0.309686	1.89834e-33	1	1	3	3	952	10	91	68
480	day10	LDHA	-0.306824	1.34324e-05	0.611567	0.764533	2	2	3939	10	91	68
481	day10	S100A4	-0.303926	8.09691e-06	0.373244	0.570044	3	3	6275	10	91	68
482	day10	LAP3	-0.294095	1.81695e-05	0.508311	0.706911	3	3	51056	10	91	68
483	day10	CD81	-0.286348	0.000160164	0.561089	0.830222	3	3	975	10	91	68
484	day10	ANXA5	-0.284942	4.21842e-06	0.229511	0.375178	3	3	308	10	91	68
485	day10	CD63	-0.279029	0.000144919	0.4132	0.613311	3	3	967	10	91	68
486	day10	PDIA6	-0.258032	2.72135e-05	0.289311	0.454844	3	3	10130	10	91	68
487	day10	CD37	-0.247802	0.00168211	0.653333	0.937311	3	3	951	10	91	68
488	day10	ab-CD69	-0.210905	1.58941e-13	1	1	2	2	969	10	91	68
489	day10	IGKC	-0.198137	6.39732e-13	0.866622	0.947	3	3	3514	10	91	68
490	day10	IGHM-secreted	-0.146288	0.000227968	0.727578	0.789244	3	3	3507	10	91	68
491	day10	ab-CD95	-0.0729356	4.97195e-05	1	1	2	2	355	10	91	68
492	day10	ab-CD45	-0.0346854	0.000275179	1	1	2	2	5788	10	91	68
493	day12-14	CCR2	-3.2877	2.42817e-15	0.00871111	0.0938	3	3	729230	12-14	105	73
494	day12-14	CXCL10	-3.179	9.74716e-14	0.0107111	0.0899111	3	3	3627	12-14	105	73
495	day12-14	IL32	-3.06223	2.02415e-63	0.0483556	0.381178	3	3	9235	12-14	105	73
496	day12-14	LAG3	-2.69022	1.65912e-27	0.0312889	0.199244	3	3	3902	12-14	105	73
497	day12-14	IGHG4-secreted	-2.46644	4.19024e-29	0.0454	0.232667	3	3	3503	12-14	105	73
498	day12-14	LGALS1	-2.4397	3.74575e-72	0.0962444	0.495711	3	3	3956	12-14	105	73
499	day12-14	LRRC32	-2.40622	2.78751e-07	0.0111556	0.0570667	3	3	2615	12-14	105	73
500	day12-14	IL2RA	-2.05531	2.99131e-10	0.0158222	0.0831111	3	3	3559	12-14	105	73
501	day12-14	GZMH	-2.01203	0.000414043	0.00742222	0.0320444	3	3	2999	12-14	105	73
502	day12-14	CCR1	-1.98788	7.4728e-12	0.0201111	0.100178	3	3	1230	12-14	105	73
503	day12-14	ab-CD89	-1.95806	2.10169e-12	0.795044	0.825244	3	3	2204	12-14	105	73
504	day12-14	CD70	-1.85069	2.71178e-24	0.0550667	0.230289	3	3	970	12-14	105	73
505	day12-14	CD3E	-1.83889	3.35407e-07	0.0122889	0.0593556	3	3	916	12-14	105	73
506	day12-14	SELPLG	-1.77837	2.66919e-18	0.0403556	0.172422	3	3	6404	12-14	105	73
507	day12-14	ITGAX	-1.74387	2.48708e-11	0.0406222	0.131867	3	3	3687	12-14	105	73
508	day12-14	CD300A	-1.71687	8.49846e-14	0.0360222	0.140778	3	3	11314	12-14	105	73
509	day12-14	CCR10	-1.70776	1.8062e-05	0.0118889	0.0484889	3	3	2826	12-14	105	73
510	day12-14	FCGR2A	-1.653	0.000340193	0.0108667	0.0391111	3	3	2212	12-14	105	73
511	day12-14	CCL22	-1.58436	0.000111757	0.0125111	0.0447333	3	3	6367	12-14	105	73
512	day12-14	IL2RB	-1.43858	1.01841e-17	0.0740889	0.226133	3	3	3560	12-14	105	73
513	day12-14	ab-CD71	-1.42347	1.14035e-25	0.817422	0.901911	3	3	7037	12-14	105	73
514	day12-14	CCL5	-1.41138	6.3604e-08	0.0317111	0.0976444	3	3	6352	12-14	105	73
515	day12-14	LGALS3	-1.38299	1.23935e-18	0.0682222	0.223444	3	3	3958	12-14	105	73
516	day12-14	VEGFA	-1.35023	6.27407e-16	0.0710222	0.211444	3	3	7422	12-14	105	73
517	day12-14	CD27	-1.31817	1.35312e-39	0.198111	0.5238	3	3	939	12-14	105	73
518	day12-14	IGHG3-secreted	-1.31187	1.54571e-19	0.133533	0.3144	3	3	3502	12-14	105	73
519	day12-14	PRDM1	-1.30027	5.61629e-16	0.0544222	0.186356	3	3	639	12-14	105	73
520	day12-14	GZMB	-1.28704	3.57094e-05	0.0125778	0.048	3	3	3002	12-14	105	73
521	day12-14	CXCR3	-1.25837	6.63722e-18	0.0915111	0.256511	3	3	2833	12-14	105	73
522	day12-14	FOSB	-1.15977	3.09168e-10	0.0695778	0.1708	3	3	2354	12-14	105	73
523	day12-14	AIM2	-1.15745	1.40812e-17	0.0897778	0.255444	3	3	9447	12-14	105	73
524	day12-14	C10orf54	-1.1259	4.82022e-22	0.1194	0.329511	3	3	64115	12-14	105	73
525	day12-14	CD38	-1.09728	1.7645e-11	0.0541556	0.158978	3	3	952	12-14	105	73
526	day12-14	GPI	-1.0629	5.29465e-41	0.3002	0.647044	3	3	2821	12-14	105	73
527	day12-14	IGHG1-membrane	-1.05666	6.79559e-12	0.100911	0.228444	3	3	3500	12-14	105	73
528	day12-14	ab-CD8	-1.04199	1.98517e-30	0.7944	0.883733	3	3	925	12-14	105	73
529	day12-14	ICAM1	-1.01639	7.03348e-10	0.0589778	0.155622	3	3	3383	12-14	105	73
530	day12-14	CD320	-0.963828	2.48022e-12	0.0844444	0.211667	3	3	51293	12-14	105	73
531	day12-14	CD79B	-0.954925	1.95586e-51	0.417778	0.909022	3	3	974	12-14	105	73
532	day12-14	CCL4	-0.950697	0.000159444	0.0126444	0.0443778	3	3	6351	12-14	105	73
533	day12-14	ab-CD56	-0.937211	1.40135e-10	0.740467	0.786333	3	3	4684	12-14	105	73
534	day12-14	ITGAL	-0.922522	1.89741e-26	0.249711	0.535444	3	3	3683	12-14	105	73
535	day12-14	CD82	-0.842388	1.29929e-06	0.0992222	0.184378	3	3	3732	12-14	105	73
536	day12-14	PDIA4	-0.830629	4.11446e-15	0.152044	0.336156	3	3	9601	12-14	105	73
537	day12-14	XBP1	-0.828287	6.93742e-16	0.237289	0.434378	3	3	7494	12-14	105	73
538	day12-14	MZB1	-0.811988	4.78838e-20	0.306111	0.565222	3	3	51237	12-14	105	73
539	day12-14	ab-IgG	-0.81176	3.34747e-05	0.641	0.731089	3	3	3500	12-14	105	73
540	day12-14	JCHAIN	-0.794658	1.93646e-26	0.417667	0.625311	3	3	3512	12-14	105	73
541	day12-14	RNASE6	-0.768649	4.19452e-13	0.115889	0.270156	3	3	6039	12-14	105	73
542	day12-14	HLA-DRB3	-0.760884	3.76193e-22	0.337933	0.562622	3	3	3125	12-14	105	73
543	day12-14	TNFRSF17	-0.746872	6.30423e-10	0.0861778	0.199511	3	3	608	12-14	105	73
544	day12-14	ab-CD27	-0.741217	1.12625e-28	0.986489	0.994489	3	3	939	12-14	105	73
545	day12-14	IGHA1-secreted	-0.741009	5.14975e-30	0.4828	0.768	3	3	3493	12-14	105	73
546	day12-14	TNFRSF1B	-0.73121	7.74455e-09	0.137222	0.2582	3	3	7133	12-14	105	73
547	day12-14	CD59	-0.692185	5.56052e-10	0.0721778	0.179578	3	3	966	12-14	105	73
548	day12-14	IFITM3	-0.690587	4.431e-31	0.457756	0.774311	3	3	10410	12-14	105	73
549	day12-14	ab-CD11c	-0.676264	9.23278e-06	0.9157	0.928033	2	2	3687	12-14	105	73
550	day12-14	CCND2	-0.668994	3.58486e-09	0.0869778	0.195978	3	3	894	12-14	105	73
551	day12-14	ab-TCR-gamma-delta	-0.66001	0.000639648	0.897711	0.915511	3	3	28526	12-14	105	73
552	day12-14	CTSD	-0.64658	7.68988e-05	0.0858444	0.151756	3	3	1509	12-14	105	73
553	day12-14	CD86	-0.636512	1.03697e-05	0.0942444	0.174156	3	3	942	12-14	105	73
554	day12-14	IL23R	-0.61766	1.42931e-11	0.259644	0.435867	3	3	149233	12-14	105	73
555	day12-14	TNFSF10	-0.614702	1.42128e-17	0.383111	0.617089	3	3	8743	12-14	105	73
556	day12-14	TLR9	-0.60345	8.19929e-06	0.0999556	0.181778	3	3	54106	12-14	105	73
557	day12-14	JUN	-0.581047	1.78012e-06	0.115644	0.209244	3	3	3725	12-14	105	73
558	day12-14	ab-CD45RO	-0.571679	3.44126e-17	0.890156	0.960467	3	3	5788	12-14	105	73
559	day12-14	DUSP2	-0.567315	1.78342e-05	0.124133	0.209022	3	3	1844	12-14	105	73
560	day12-14	PFKP	-0.561358	1.48048e-10	0.267178	0.444622	3	3	5214	12-14	105	73
561	day12-14	DUSP1	-0.559235	1.49196e-05	0.145778	0.232822	3	3	1843	12-14	105	73
562	day12-14	JUNB	-0.553019	2.54101e-07	0.205422	0.326844	3	3	3726	12-14	105	73
563	day12-14	ISG15	-0.530239	2.40761e-18	0.548622	0.845089	3	3	9636	12-14	105	73
564	day12-14	OASL	-0.519831	3.2688e-06	0.117244	0.211733	3	3	8638	12-14	105	73
565	day12-14	LAP3	-0.512838	7.20121e-13	0.426689	0.646978	3	3	51056	12-14	105	73
566	day12-14	ab-CD25	-0.486808	1.49283e-25	0.984622	0.995689	3	3	3559	12-14	105	73
567	day12-14	CD180	-0.473904	2.76091e-08	0.207867	0.356822	3	3	4064	12-14	105	73
568	day12-14	STAT3	-0.473118	2.67099e-07	0.217044	0.351289	3	3	6774	12-14	105	73
569	day12-14	S100A10	-0.466083	2.35286e-08	0.287956	0.454733	3	3	6281	12-14	105	73
570	day12-14	RPN2	-0.451013	1.03826e-07	0.221689	0.374667	3	3	6185	12-14	105	73
571	day12-14	LDHA	-0.435257	4.17087e-08	0.497733	0.649633	2	2	3939	12-14	105	73
572	day12-14	GNAI2	-0.423794	1.32701e-09	0.361889	0.566511	3	3	2771	12-14	105	73
573	day12-14	ALDOC	-0.402787	9.30853e-08	0.329489	0.5032	3	3	230	12-14	105	73
574	day12-14	CD63	-0.374849	6.50114e-07	0.380978	0.578533	3	3	967	12-14	105	73
575	day12-14	IL15RA	-0.374659	5.42459e-05	0.156778	0.249822	3	3	3601	12-14	105	73
576	day12-14	LGALS9	-0.368444	2.62662e-08	0.466711	0.670644	3	3	3965	12-14	105	73
577	day12-14	ENTPD1	-0.365698	8.77954e-06	0.151111	0.254689	3	3	953	12-14	105	73
578	day12-14	ab-CD183	-0.364985	1.49076e-11	1	1	2	2	2833	12-14	105	73
579	day12-14	IGHG2-secreted	-0.35852	1.69815e-11	0.679267	0.820244	3	3	3501	12-14	105	73
580	day12-14	ANXA5	-0.356646	9.79416e-07	0.2142	0.352156	3	3	308	12-14	105	73
581	day12-14	ab-CD39	-0.355174	2.9408e-36	1	1	3	3	953	12-14	105	73
582	day12-14	IRF4	-0.350626	8.32554e-06	0.173467	0.290311	3	3	3662	12-14	105	73
583	day12-14	IGHG1-secreted	-0.335302	9.60234e-11	0.690689	0.817089	3	3	3500	12-14	105	73
584	day12-14	S100A4	-0.333721	3.178e-06	0.3238	0.498178	3	3	6275	12-14	105	73
585	day12-14	CASP3	-0.325238	0.000114751	0.134	0.216889	3	3	836	12-14	105	73
586	day12-14	ab-CCR7	-0.302254	1.29939e-07	0.902422	0.933978	3	3	1236	12-14	105	73
587	day12-14	ab-CD38	-0.288942	9.04374e-19	1	1	3	3	952	12-14	105	73
588	day12-14	PDIA6	-0.283443	2.98845e-05	0.264867	0.406444	3	3	10130	12-14	105	73
589	day12-14	IGHM-secreted	-0.259401	1.40705e-12	0.755667	0.8532	3	3	3507	12-14	105	73
590	day12-14	ab-CD69	-0.224079	4.56952e-16	1	1	2	2	969	12-14	105	73
591	day12-14	IRF7	-0.214937	1.74355e-06	0.784933	0.892233	2	2	3665	12-14	105	73
592	day12-14	TPI1	-0.187769	1.36325e-06	0.748911	0.861267	3	3	7167	12-14	105	73
593	day12-14	ENO1	-0.16714	0.000181458	0.7508	0.858867	3	3	2023	12-14	105	73
594	day12-14	ab-CD45	-0.160594	2.08453e-05	1	1	2	2	5788	12-14	105	73
595	day12-14	IGKC	-0.115625	1.80302e-07	0.9196	0.954	3	3	3514	12-14	105	73
596	day12-14	GAPDH	-0.115512	4.74457e-11	0.934644	0.977156	3	3	2597	12-14	105	73
597	day12-14	ab-CD95	-0.0871793	2.46682e-05	1	1	2	2	355	12-14	105	73

## Sheet: PB adult downregulation
	day_group	marker	log2FC_mean	pval_adj_mean	pct1_mean	pct2_mean	n1	n2	ENTREZID	days	n_significant	n_distinct
1	day0	EGR1	3.07122	0	0.660976	0.182683	3	3	1958	0	82	59
2	day0	MYC	2.60082	7.17164e-05	0.161138	0.0481301	3	3	4609	0	82	59
3	day0	NFATC2	2.58829	2.42409e-06	0.168049	0.0320325	3	3	4773	0	82	59
4	day0	CD83	2.57262	2.46502e-08	0.173089	0.014878	3	3	9308	0	82	59
5	day0	CD69	2.52752	1.98582e-05	0.194309	0.0614634	3	3	969	0	82	59
6	day0	ab-TCR-alpha-beta	2.4625	0	0.878455	0.510813	3	3	28755	0	82	59
7	day0	STAT6	2.3977	4.99949e-06	0.13122	0.0147967	3	3	6778	0	82	59
8	day0	CNOT2	2.02647	1.67134e-06	0.260732	0.0942276	3	3	4848	0	82	59
9	day0	PCNA	1.93991	5.00541e-09	0.292846	0.0790244	3	3	5111	0	82	59
10	day0	ATF6B	1.91546	2.1929e-08	0.245772	0.049187	3	3	1388	0	82	59
11	day0	TNFRSF13C	1.89409	2.596e-08	0.335691	0.127073	3	3	115650	0	82	59
12	day0	VNN2	1.82407	4.47109e-07	0.310325	0.119675	3	3	8875	0	82	59
13	day0	IGHD-membrane	1.81691	0.000191754	0.22878	0.104634	3	3	3495	0	82	59
14	day0	IRF8	1.79112	2.04199e-06	0.272114	0.0993496	3	3	3394	0	82	59
15	day0	ab-CD158e1	1.69636	2.20313e-09	0.325122	0.0933333	3	3	3811	0	82	59
16	day0	CCL3	1.69213	1.3835e-06	0.276016	0.0963415	3	3	6348	0	82	59
17	day0	ab-CD278	1.65036	0	0.768618	0.420244	3	2	29851	0	82	59
18	day0	IL10	1.59843	1.67487e-10	0.598618	0.399512	3	3	3586	0	82	59
19	day0	LYN	1.5836	4.46189e-10	0.468537	0.197805	3	3	4067	0	82	59
20	day0	CXCR5	1.56551	0	0.457561	0.175366	3	3	643	0	82	59
21	day0	ICAM1	1.47	0.000287995	0.170813	0.0605691	3	3	3383	0	82	59
22	day0	RNASE6	1.4179	0.000127746	0.271707	0.128537	3	3	6039	0	82	59
23	day0	ADA	1.37763	0	0.724959	0.345447	3	3	100	0	82	59
24	day0	DOCK8	1.37635	4.29282e-08	0.409106	0.180163	3	3	81704	0	82	59
25	day0	CD46	1.35334	0	0.676016	0.316585	3	3	4179	0	82	59
26	day0	S100A10	1.32811	3.11382e-10	0.489919	0.197886	3	3	6281	0	82	59
27	day0	IL21R	1.27737	2.13241e-05	0.33561	0.106829	2	2	50615	0	82	59
28	day0	TIAF1	1.26152	2.88844e-09	0.465528	0.197154	3	3	9220	0	82	59
29	day0	BIN2	1.24772	8.40681e-10	0.560081	0.307398	3	3	51411	0	82	59
30	day0	IGBP1	1.15943	5.9845e-05	0.389675	0.220813	3	3	3476	0	82	59
31	day0	TRBC2	1.13668	1.6518e-06	0.347317	0.146179	3	3	28638	0	82	59
32	day0	BLNK	1.12013	0	0.786016	0.515691	3	3	29760	0	82	59
33	day0	CR2	1.1007	0.000257965	0.362683	0.223659	3	3	1380	0	82	59
34	day0	LAT2	1.09035	1.17986e-06	0.350325	0.133008	3	3	7462	0	82	59
35	day0	TNFSF8	1.07821	5.94347e-05	0.284309	0.12878	3	3	944	0	82	59
36	day0	ZBED2	1.06078	2.87853e-05	0.266748	0.104634	3	3	79413	0	82	59
37	day0	RGS1	1.06057	0	0.966504	0.580569	3	3	5996	0	82	59
38	day0	TYK2	1.01827	1.13188e-08	0.657927	0.306707	2	2	7297	0	82	59
39	day0	CD9	0.967459	9.98222e-06	0.539837	0.424065	3	3	928	0	82	59
40	day0	CD164	0.949244	0	0.732602	0.469675	3	3	8763	0	82	59
41	day0	DUSP2	0.944721	7.48231e-08	0.59935	0.415122	3	3	1844	0	82	59
42	day0	ANXA5	0.910335	0	0.716098	0.378293	3	3	308	0	82	59
43	day0	CD53	0.887167	6.02006e-10	0.750732	0.543902	3	3	963	0	82	59
44	day0	RPN2	0.847051	0	0.901707	0.709431	3	3	6185	0	82	59
45	day0	CD22	0.831166	0	0.794553	0.461463	3	3	933	0	82	59
46	day0	DUSP1	0.750616	4.77504e-10	0.814146	0.635772	3	3	1843	0	82	59
47	day0	ENO1	0.7463	2.14133e-10	0.78813	0.606667	3	3	2023	0	82	59
48	day0	CD52	0.718517	5.10045e-07	0.66187	0.451138	3	3	1043	0	82	59
49	day0	ab-CXCR5	0.699038	0	0.993821	0.983008	3	3	643	0	82	59
50	day0	ab-CD279	0.657961	0	0.982927	1	3	3	5133	0	82	59
51	day0	KDELR1	0.603164	9.29323e-06	0.665041	0.47748	3	3	10945	0	82	59
52	day0	TPI1	0.583806	3.14096e-08	0.879024	0.769187	3	3	7167	0	82	59
53	day0	HLA-DRA	0.581054	0	0.908618	0.86626	3	3	3122	0	82	59
54	day0	LAMP1	0.578724	1.79357e-05	0.617642	0.365935	3	3	3916	0	82	59
55	day0	IRF4	0.556999	1.47157e-05	0.749187	0.759024	3	3	3662	0	82	59
56	day0	MANF	0.549292	3.93236e-05	0.846341	0.663415	2	2	7873	0	82	59
57	day0	HLA-DPA1	0.547021	0	0.915203	0.919919	3	3	3113	0	82	59
58	day0	HLA-DMA	0.535296	2.09722e-10	0.89439	0.839919	3	3	3108	0	82	59
59	day0	PGK1	0.522101	9.95839e-09	0.846179	0.819268	3	3	5230	0	82	59
60	day0	JCHAIN	0.492962	0	0.975122	0.963415	3	3	3512	0	82	59
61	day0	POU2AF1	0.411803	1.37046e-09	0.94374	0.985528	3	3	5450	0	82	59
62	day0	VPREB3	0.40983	4.08626e-10	0.925935	0.880732	3	3	29802	0	82	59
63	day0	CXCL13	0.377574	4.84029e-10	0.163659	0	3	3	10563	0	82	59
64	day0	CD63	0.361814	0.000160085	0.876585	0.680976	3	3	967	0	82	59
65	day0	ab-CD20	0.353041	0	1	1	3	3	931	0	82	59
66	day0	ab-CD71	0.3481	3.58616e-10	1	1	3	3	7037	0	82	59
67	day0	ab-CD25	0.336704	0.000150571	0.912927	0.921057	3	3	3559	0	82	59
68	day0	CD74	0.33309	0	0.978455	1	3	3	972	0	82	59
69	day0	IGLC3	0.316559	0.00010994	0.955122	1	3	3	3539	0	82	59
70	day0	ab-CD19	0.307283	1.65336e-10	1	1	3	3	930	0	82	59
71	day0	ab-CD38	0.251733	5.02127e-07	1	1	3	3	952	0	82	59
72	day0	CD79A	0.23392	0	1	1	3	3	973	0	82	59
73	day0	CD3D	0.216179	1.04031e-05	0.0886992	0	3	3	915	0	82	59
74	day0	ab-CD21	0.214889	1.81937e-05	1	1	2	2	1380	0	82	59
75	day0	XBP1	0.202547	1.46809e-05	0.990813	0.956585	3	3	7494	0	82	59
76	day0	ab-HLA-DR	0.159043	0.000187177	1	1	3	2	3122	0	82	59
77	day0	ITK	0.147318	0.000152678	0.0676423	0	3	3	3702	0	82	59
78	day0	KLRB1	0.143	2.47985e-05	0.0819512	0	3	3	3820	0	82	59
79	day0	CTLA4	0.107802	0.000938071	0.0531707	0	3	3	1493	0	82	59
80	day0	FTH1	0.103576	0.000119725	0.0695935	0	3	3	2495	0	82	59
81	day0	TCF7	0.0639798	0.00614763	0.0379675	0	3	3	6932	0	82	59
82	day0	CD1D	0.0607752	0.0027312	0.0445528	0	3	3	912	0	82	59
83	day04	LEF1	3.3902	4.59751e-06	0.126504	0.014065	3	3	51176	4	20	14
84	day04	CXCL13	2.69618	8.53497e-07	0.156667	0.0204065	3	3	10563	4	20	14
85	day04	CD9	2.63562	0	0.29626	0.0607317	3	3	928	4	20	14
86	day04	TNFSF8	2.05706	2.72993e-07	0.238293	0.0634959	3	3	944	4	20	14
87	day04	SLC7A7	1.55117	1.56546e-05	0.208049	0.0641463	3	3	9056	4	20	14
88	day04	ab-CD278	1.45489	0	0.855041	0.56122	3	2	29851	4	20	14
89	day04	MME	1.33521	0.000358244	0.0673984	0.00276423	3	3	4311	4	20	14
90	day04	QPCT	1.2179	8.00281e-05	0.315041	0.16065	3	3	25797	4	20	14
91	day04	ZBED2	1.16928	1.12885e-05	0.343252	0.162114	3	3	79413	4	20	14
92	day04	VPREB3	0.850624	2.42767e-10	0.728293	0.503902	3	3	29802	4	20	14
93	day04	ab-CD4	0.713219	0	0.988455	0.92935	3	3	920	4	20	14
94	day04	IL10	0.653621	0.000829126	0.620325	0.549919	3	3	3586	4	20	14
95	day04	ab-IgD	0.573303	6.60043e-08	0.988618	0.972033	3	3	3495	4	20	14
96	day04	ab-CD279	0.531564	2.51103e-09	0.991301	0.974634	3	3	5133	4	20	14
97	day04	ab-CD3	0.483003	1.22528e-06	0.966016	0.855122	3	3	916	4	20	14
98	day04	ab-CD28	0.383741	0.00104048	0.909431	0.782195	3	3	940	4	20	14
99	day04	ab-CD21	0.374407	0.000179469	1	1	2	2	1380	4	20	14
100	day04	ab-CD38	0.168243	6.63671e-07	1	1	3	3	952	4	20	14
101	day04	JCHAIN	0.121188	4.70265e-06	0.99122	0.985772	3	3	3512	4	20	14
102	day04	XBP1	0.114271	3.45783e-05	0.989675	0.982114	3	3	7494	4	20	14
103	day06-07	CD9	4.28102	6.71146e-10	0.191626	0.0110569	3	3	928	2025-06-07	17	15
104	day06-07	QPCT	2.87241	1.27319e-09	0.258455	0.0513008	3	3	25797	2025-06-07	17	15
105	day06-07	ab-TCR-alpha-beta	2.17808	4.69983e-05	0.681301	0.572114	3	3	28755	2025-06-07	17	15
106	day06-07	TNFSF8	2.10507	0.000151072	0.166504	0.0513008	3	3	944	2025-06-07	17	15
107	day06-07	ZBED2	1.96108	3.97857e-08	0.271382	0.0703252	3	3	79413	2025-06-07	17	15
108	day06-07	DUSP1	1.82506	2.01905e-05	0.239187	0.0900813	3	3	1843	2025-06-07	17	15
109	day06-07	ab-CD278	1.70692	0	0.783659	0.501463	3	2	29851	2025-06-07	17	15
110	day06-07	ab-CD279	1.06057	0	0.981707	0.930407	3	3	5133	2025-06-07	17	15
111	day06-07	IL4R	1.05137	3.80205e-05	0.381463	0.202114	3	3	3566	2025-06-07	17	15
112	day06-07	RGS1	0.984701	1.12114e-07	0.576911	0.370732	3	3	5996	2025-06-07	17	15
113	day06-07	VPREB3	0.812294	1.24322e-08	0.72187	0.486911	3	3	29802	2025-06-07	17	15
114	day06-07	CD46	0.729429	7.52425e-06	0.625122	0.466098	3	3	4179	2025-06-07	17	15
115	day06-07	ab-CD4	0.688358	1.68235e-10	0.990813	0.952439	3	3	920	2025-06-07	17	15
116	day06-07	IL10	0.648266	1.92558e-07	0.805854	0.715528	3	3	3586	2025-06-07	17	15
117	day06-07	ab-CD3	0.534712	0.000131172	0.954472	0.896016	3	3	916	2025-06-07	17	15
118	day06-07	XBP1	0.217584	3.56019e-07	0.994553	0.96935	3	3	7494	2025-06-07	17	15
119	day06-07	ab-CD27	0.187479	7.25182e-06	1	1	3	3	939	2025-06-07	17	15
120	day07-08	CD9	3.53392	4.46964e-07	0.149512	0.0130081	3	3	928	2025-07-08	20	17
121	day07-08	CXCL13	3.40128	1.53639e-06	0.158943	0.0234146	3	3	10563	2025-07-08	20	17
122	day07-08	QPCT	2.49567	6.22614e-08	0.236667	0.0527642	3	3	25797	2025-07-08	20	17
123	day07-08	ab-TCR-alpha-beta	2.20726	1.51211e-05	0.681301	0.555285	3	3	28755	2025-07-08	20	17
124	day07-08	SLAMF1	2.05397	4.16261e-06	0.22878	0.0701626	3	3	6504	2025-07-08	20	17
125	day07-08	ZBED2	1.84997	2.74479e-07	0.254878	0.0673171	3	3	79413	2025-07-08	20	17
126	day07-08	ab-CD278	1.51681	0	0.783659	0.501463	3	2	29851	2025-07-08	20	17
127	day07-08	IL4R	1.18417	7.92853e-06	0.38626	0.195447	3	3	3566	2025-07-08	20	17
128	day07-08	RGS1	1.03814	1.10754e-08	0.615203	0.383089	3	3	5996	2025-07-08	20	17
129	day07-08	ab-CD279	0.960367	0	0.981707	0.931545	3	3	5133	2025-07-08	20	17
130	day07-08	MME	0.925199	0.00144046	0.0574797	0.00130081	3	3	4311	2025-07-08	20	17
131	day07-08	PYCR1	0.817164	0.000370203	0.475366	0.321707	3	3	5831	2025-07-08	20	17
132	day07-08	ab-CD4	0.646794	1.90039e-10	0.990813	0.952439	3	3	920	2025-07-08	20	17
133	day07-08	CD46	0.646129	0.00025715	0.598862	0.446423	3	3	4179	2025-07-08	20	17
134	day07-08	IL10	0.600984	1.77092e-07	0.798455	0.702195	3	3	3586	2025-07-08	20	17
135	day07-08	VPREB3	0.564555	5.3513e-05	0.706748	0.511545	3	3	29802	2025-07-08	20	17
136	day07-08	ab-IgD	0.540241	5.86219e-05	0.99561	0.987886	3	3	3495	2025-07-08	20	17
137	day07-08	ab-CD3	0.435148	0.0010116	0.954472	0.896016	3	3	916	2025-07-08	20	17
138	day07-08	XBP1	0.22082	7.91454e-10	0.977561	0.969593	3	3	7494	2025-07-08	20	17
139	day07-08	ab-CD27	0.205792	5.2414e-07	1	1	3	3	939	2025-07-08	20	17
140	day10	CD4	3.61005	0.000765228	0.0780488	0.00861789	3	3	920	10	25	20
141	day10	QPCT	3.54425	5.96787e-09	0.207236	0.0269106	3	3	25797	10	25	20
142	day10	CD9	3.51539	1.41798e-05	0.116667	0.0112195	3	3	928	10	25	20
143	day10	IL6R	3.20464	3.87958e-06	0.165935	0.0326829	3	3	3570	10	25	20
144	day10	ZBED2	2.89547	1.41698e-09	0.24813	0.0428455	3	3	79413	10	25	20
145	day10	ab-TCR-alpha-beta	2.44533	0.000131358	0.645772	0.546341	3	3	28755	10	25	20
146	day10	TIGIT	2.10519	0.000645337	0.127967	0.034065	3	3	201633	10	25	20
147	day10	TNFSF8	1.99729	0.00138982	0.119919	0.0337398	3	3	944	10	25	20
148	day10	ab-CD278	1.59742	0	0.768943	0.502195	3	2	29851	10	25	20
149	day10	PYCR1	1.32393	1.08009e-05	0.379837	0.204553	3	3	5831	10	25	20
150	day10	IL10	1.26421	1.43759e-06	0.513984	0.365691	3	3	3586	10	25	20
151	day10	ab-CD279	1.25255	0	0.972846	0.914553	3	3	5133	10	25	20
152	day10	CD46	0.893403	2.50296e-06	0.613333	0.444634	3	3	4179	10	25	20
153	day10	KDELR1	0.87399	0.00102523	0.436667	0.305772	3	3	10945	10	25	20
154	day10	CD59	0.793622	0.000322261	0.508699	0.395935	3	3	966	10	25	20
155	day10	CD22	0.750079	0.000124624	0.530569	0.368211	3	3	933	10	25	20
156	day10	ab-CD4	0.715089	0	0.984878	0.935203	3	3	920	10	25	20
157	day10	ab-CD3	0.64767	9.18336e-10	0.971301	0.898455	3	3	916	10	25	20
158	day10	VPREB3	0.630547	7.16046e-05	0.652846	0.505203	3	3	29802	10	25	20
159	day10	PRDM1	0.54691	0.000112718	0.707236	0.600081	3	3	639	10	25	20
160	day10	ab-CD28	0.486714	6.19287e-05	0.871057	0.797236	3	3	940	10	25	20
161	day10	ab-Tim3	0.428306	0.000117446	0.962439	0.900894	3	3	84868	10	25	20
162	day10	ab-CD19	0.394386	1.12104e-06	0.995528	0.972683	3	3	930	10	25	20
163	day10	XBP1	0.258491	6.77875e-07	0.985041	0.951463	3	3	7494	10	25	20
164	day10	ab-HLA-DR	0.162865	0.00011136	1	1	3	2	3122	10	25	20
165	day12-14	QPCT	2.58389	1.2504e-05	0.166341	0.0350407	3	3	25797	2025-12-14	14	8
166	day12-14	CXCL13	2.06797	9.67472e-06	0.18878	0.0470732	3	3	10563	2025-12-14	14	8
167	day12-14	SLAMF1	1.8802	1.23756e-05	0.230732	0.0752846	3	3	6504	2025-12-14	14	8
168	day12-14	IL10	1.19932	0.00020555	0.485772	0.382683	3	3	3586	2025-12-14	14	8
169	day12-14	ab-CD278	1.18455	3.75287e-08	0.758618	0.622927	3	2	29851	2025-12-14	14	8
170	day12-14	CD46	0.968679	2.98942e-08	0.616341	0.383252	3	3	4179	2025-12-14	14	8
171	day12-14	ab-CD279	0.815611	3.31072e-06	0.965041	0.921951	3	3	5133	2025-12-14	14	8
172	day12-14	ab-CD21	0.533067	2.75286e-07	0.995	0.975488	2	2	1380	2025-12-14	14	8
173	day12-14	ab-CXCR5	0.36319	5.59958e-05	0.996667	0.992114	3	3	643	2025-12-14	14	8
174	day12-14	ab-IgD	0.340563	3.41746e-07	0.996423	0.970163	3	3	3495	2025-12-14	14	8
175	day12-14	ab-CD27	0.301596	0	1	1	3	3	939	2025-12-14	14	8
176	day12-14	ab-CD62L	0.229452	0.000198107	1	0.99935	3	3	6402	2025-12-14	14	8
177	day12-14	XBP1	0.206258	2.87849e-06	0.976098	0.94878	3	3	7494	2025-12-14	14	8
178	day12-14	ab-HLA-DR	0.106774	0.000217999	1	1	3	2	3122	2025-12-14	14	8

## Sheet: PB adult upregulation
	day_group	marker	log2FC_mean	pval_adj_mean	pct1_mean	pct2_mean	n1	n2	ENTREZID	days	n_significant	n_distinct
1	day0	IGHG4-secreted	-5.06568	0	0.0188618	0.374553	3	3	3503	0	24	17
2	day0	TYROBP	-2.83073	8.91651e-06	0.0293496	0.151951	3	3	7305	0	24	17
3	day0	TNF	-1.9218	7.69115e-07	0.0254472	0.17122	3	3	7124	0	24	17
4	day0	CCL4	-1.90977	4.50483e-05	0.0372358	0.162114	3	3	6351	0	24	17
5	day0	TNFRSF1B	-1.61069	1.76165e-06	0.025935	0.162114	3	3	7133	0	24	17
6	day0	EGR3	-1.13866	9.75755e-06	0.0314634	0.162114	3	3	1960	0	24	17
7	day0	DDIT4	-1.06045	3.30154e-09	0.199187	0.50187	3	3	54541	0	24	17
8	day0	FOXO1	-1.05639	1.08853e-05	0.0756911	0.23187	3	3	2308	0	24	17
9	day0	CD79B	-1.04573	0	0.418699	0.813577	3	3	974	0	24	17
10	day0	ab-CD83	-1.03339	1.50392e-10	0.751301	0.897967	3	3	9308	0	24	17
11	day0	HLA-DRB3	-0.913025	6.28546e-07	0.344309	0.570813	3	3	3125	0	24	17
12	day0	ab-CD24	-0.877049	2.45456e-06	0.554024	0.759146	2	2	100133941	0	24	17
13	day0	IGHG1-membrane	-0.844782	1.08507e-06	0.26561	0.518455	3	3	3500	0	24	17
14	day0	IGHA1-secreted	-0.827559	0	0.30626	0.777642	3	3	3493	0	24	17
15	day0	ab-CD8	-0.794427	3.79648e-05	0.806098	0.846504	3	3	925	0	24	17
16	day0	ab-CD56	-0.636972	0	0.893496	0.977073	3	3	4684	0	24	17
17	day0	IGHG3-secreted	-0.592756	0	0.755691	0.847886	3	3	3502	0	24	17
18	day0	CXCR4	-0.49576	2.52573e-05	0.356585	0.620488	3	3	7852	0	24	17
19	day0	ab-CD39	-0.438239	0	1	1	3	3	953	0	24	17
20	day0	ab-CD45RA	-0.306237	3.31889e-09	0.995447	1	3	3	5788	0	24	17
21	day0	IGHG2-secreted	-0.284006	3.88486e-10	0.92935	0.982602	3	3	3501	0	24	17
22	day0	IGHG1-secreted	-0.25475	0.000133821	0.933496	0.958049	3	3	3500	0	24	17
23	day0	FCGR2A	0	0.000197645	0	0.0656098	3	3	2212	0	24	17
24	day0	FLT3	0	0.00639348	0	0.0376423	3	3	2322	0	24	17
25	day04	IGHG4-secreted	-4.73166	7.98985e-09	0.0157724	0.176585	3	3	3503	4	102	83
26	day04	CD300A	-3.98958	1.22771e-05	0.00813008	0.106667	3	3	11314	4	102	83
27	day04	IL15	-2.8925	1.70008e-06	0.0247154	0.156423	3	3	3600	4	102	83
28	day04	CXCL10	-2.48369	5.69574e-05	0.0473171	0.162602	3	3	3627	4	102	83
29	day04	CCR1	-2.46806	0.000143662	0.0222764	0.116423	3	3	1230	4	102	83
30	day04	TMEM97	-1.97931	1.45003e-08	0.0646341	0.27	3	3	27346	4	102	83
31	day04	CXCR3	-1.90562	0	0.123008	0.440976	3	3	2833	4	102	83
32	day04	MCM4	-1.87798	0	0.114228	0.395447	3	3	4173	4	102	83
33	day04	NKG7	-1.68345	2.36684e-05	0.0561789	0.190488	3	3	4818	4	102	83
34	day04	LAG3	-1.59541	5.44669e-06	0.0941463	0.256504	3	3	3902	4	102	83
35	day04	STAT5A	-1.5935	4.30548e-08	0.118455	0.334228	3	3	6776	4	102	83
36	day04	IL32	-1.58805	4.39388e-08	0.135935	0.359756	3	3	9235	4	102	83
37	day04	IGHG1-membrane	-1.55173	2.34274e-07	0.124146	0.328943	3	3	3500	4	102	83
38	day04	IFITM3	-1.52564	0	0.31878	0.779431	3	3	10410	4	102	83
39	day04	MYC	-1.46064	8.71124e-06	0.146423	0.318211	3	3	4609	4	102	83
40	day04	CCND2	-1.45899	0	0.193496	0.495528	3	3	894	4	102	83
41	day04	CD79B	-1.45856	0	0.379268	0.944472	3	3	974	4	102	83
42	day04	KIAA0101	-1.43099	0	0.22935	0.546098	3	3	9768	4	102	83
43	day04	AURKB	-1.40315	1.90059e-10	0.166667	0.465366	3	3	9212	4	102	83
44	day04	IGHA1-secreted	-1.39424	0	0.531545	0.960163	3	3	3493	4	102	83
45	day04	CD320	-1.38617	0	0.263415	0.597805	3	3	51293	4	102	83
46	day04	TYMS	-1.38249	0	0.244065	0.533333	3	3	7298	4	102	83
47	day04	CD86	-1.37451	8.25637e-06	0.128211	0.302439	3	3	942	4	102	83
48	day04	TK1	-1.36589	0	0.259756	0.596992	3	3	7083	4	102	83
49	day04	GPI	-1.36433	0	0.517154	0.901138	3	3	2821	4	102	83
50	day04	ITGAL	-1.34008	0	0.443089	0.848862	3	3	3683	4	102	83
51	day04	LGALS1	-1.32649	0	0.508943	0.943496	3	3	3956	4	102	83
52	day04	BTLA	-1.3169	0.00054532	0.0876423	0.206179	3	3	151888	4	102	83
53	day04	TNFRSF17	-1.27488	0	0.365366	0.769431	3	3	608	4	102	83
54	day04	FAS	-1.25932	2.27485e-06	0.126667	0.321951	3	3	355	4	102	83
55	day04	CD180	-1.23138	0	0.303902	0.59748	3	3	4064	4	102	83
56	day04	ab-CD56	-1.22913	2.52759e-05	0.680244	0.73252	3	3	4684	4	102	83
57	day04	MCM2	-1.22321	2.55485e-08	0.232683	0.474715	3	3	4171	4	102	83
58	day04	MKI67	-1.21358	1.04392e-05	0.0991057	0.271382	3	3	4288	4	102	83
59	day04	HMMR	-1.21026	2.74837e-06	0.168943	0.356911	3	3	3161	4	102	83
60	day04	GNAI2	-1.20998	0	0.420488	0.806423	3	3	2771	4	102	83
61	day04	TNFRSF1B	-1.16743	0	0.24878	0.568374	3	3	7133	4	102	83
62	day04	TNFSF10	-1.0903	0	0.437317	0.747642	3	3	8743	4	102	83
63	day04	PTTG2	-1.08385	2.1867e-07	0.271707	0.500325	3	3	10744	4	102	83
64	day04	PCNA	-1.08197	1.39184e-07	0.380325	0.551057	3	3	5111	4	102	83
65	day04	RNASE6	-1.04494	9.81713e-08	0.223577	0.482846	3	3	6039	4	102	83
66	day04	LGALS9	-1.03726	0	0.415447	0.729512	3	3	3965	4	102	83
67	day04	CXCR4	-0.964678	7.99217e-08	0.319187	0.55878	3	3	7852	4	102	83
68	day04	CD70	-0.959351	1.21558e-05	0.22813	0.419593	3	3	970	4	102	83
69	day04	ITGA4	-0.952772	0.000669753	0.192683	0.330081	3	3	3676	4	102	83
70	day04	HLA-DRB3	-0.947836	1.2848e-08	0.362114	0.608293	3	3	3125	4	102	83
71	day04	CCNB1	-0.930477	8.97743e-05	0.175935	0.344146	3	3	891	4	102	83
72	day04	ab-CD73	-0.924333	3.21925e-08	0.886098	0.938049	2	2	4907	4	102	83
73	day04	CD48	-0.904638	0	0.439512	0.773496	3	3	962	4	102	83
74	day04	VPS28	-0.904267	3.16575e-09	0.345691	0.646585	3	3	51160	4	102	83
75	day04	UBE2C	-0.886615	5.04556e-05	0.168618	0.355447	3	3	11065	4	102	83
76	day04	PFKP	-0.879438	7.23426e-08	0.391626	0.612358	3	3	5214	4	102	83
77	day04	ENTPD1	-0.874485	0	0.472439	0.759187	3	3	953	4	102	83
78	day04	TOP2A	-0.850935	2.88502e-05	0.187642	0.38626	3	3	7153	4	102	83
79	day04	TLR9	-0.846502	0.000243073	0.220163	0.390163	3	3	54106	4	102	83
80	day04	IL23R	-0.845783	1.11356e-08	0.484959	0.681545	3	3	149233	4	102	83
81	day04	IFIT3	-0.837146	4.59164e-08	0.432927	0.66122	3	3	3437	4	102	83
82	day04	CASP3	-0.816045	0	0.513902	0.771463	3	3	836	4	102	83
83	day04	STAT3	-0.801266	3.13648e-06	0.31626	0.544553	3	3	6774	4	102	83
84	day04	C10orf54	-0.7996	2.48155e-09	0.466098	0.715935	3	3	64115	4	102	83
85	day04	ITGB7	-0.795584	0	0.504065	0.831463	3	3	3695	4	102	83
86	day04	IRF8	-0.771063	9.44871e-05	0.230813	0.407967	3	3	3394	4	102	83
87	day04	HMGB2	-0.764166	1.18695e-06	0.479268	0.642846	3	3	3148	4	102	83
88	day04	SELPLG	-0.761465	5.1222e-06	0.303008	0.525285	3	3	6404	4	102	83
89	day04	BANK1	-0.747561	0.000377928	0.454756	0.587073	2	2	55024	4	102	83
90	day04	CD37	-0.743046	0	0.560732	0.875285	3	3	951	4	102	83
91	day04	CASP5	-0.724924	3.10889e-07	0.455528	0.666423	3	3	838	4	102	83
92	day04	ab-CD183	-0.707125	4.0653e-10	0.973659	0.996829	2	2	2833	4	102	83
93	day04	LGALS3	-0.700511	1.80699e-10	0.631138	0.809837	3	3	3958	4	102	83
94	day04	ISG15	-0.695667	0	0.712276	0.98	3	3	9636	4	102	83
95	day04	ab-CD83	-0.686041	0.00105214	0.904309	0.86813	3	3	9308	4	102	83
96	day04	PDIA4	-0.647364	0	0.723902	0.915691	3	3	9601	4	102	83
97	day04	CD81	-0.646935	0	0.629675	0.948455	3	3	975	4	102	83
98	day04	BAX	-0.640698	8.90502e-09	0.630163	0.773496	3	3	581	4	102	83
99	day04	ab-CD71	-0.617817	4.32036e-10	0.992114	0.995041	3	3	7037	4	102	83
100	day04	LAMP1	-0.614268	5.81883e-06	0.485122	0.689187	3	3	3916	4	102	83
101	day04	OASL	-0.590445	3.74835e-05	0.387317	0.588455	3	3	8638	4	102	83
102	day04	S100A10	-0.562938	9.04546e-06	0.520894	0.694472	3	3	6281	4	102	83
103	day04	IL2RB	-0.56117	1.81886e-05	0.573496	0.71935	3	3	3560	4	102	83
104	day04	S100A4	-0.535093	0.000120798	0.518943	0.663252	3	3	6275	4	102	83
105	day04	APOBEC3G	-0.529272	9.60439e-10	0.726829	0.876504	3	3	60489	4	102	83
106	day04	IFITM2	-0.513415	2.31351e-08	0.669837	0.909106	3	3	10581	4	102	83
107	day04	HLA-DQB1	-0.508685	3.52023e-07	0.652683	0.812195	3	3	3119	4	102	83
108	day04	ITGB2	-0.493908	2.4697e-07	0.669187	0.852358	3	3	3689	4	102	83
109	day04	MZB1	-0.493546	1.12371e-06	0.723171	0.997154	3	3	51237	4	102	83
110	day04	PTPRC	-0.470779	1.56079e-05	0.624634	0.785772	3	3	5788	4	102	83
111	day04	LDHA	-0.447339	3.32213e-06	0.841098	0.905732	2	2	3939	4	102	83
112	day04	PGK1	-0.43826	0	0.912358	0.953008	3	3	5230	4	102	83
113	day04	TRBC2	-0.406546	0.000133737	0.634797	0.801138	3	3	28638	4	102	83
114	day04	TPI1	-0.342273	2.24601e-09	0.938293	0.966911	3	3	7167	4	102	83
115	day04	ENO1	-0.319974	2.39406e-09	0.963333	0.988455	3	3	2023	4	102	83
116	day04	GAPDH	-0.305407	0	1	0.998049	3	3	2597	4	102	83
117	day04	ab-CD39	-0.303121	0	1	1	3	3	953	4	102	83
118	day04	CD27	-0.26864	8.9014e-08	0.90561	0.976341	3	3	939	4	102	83
119	day04	ab-CD45RA	-0.263559	7.30827e-08	0.994146	1	3	3	5788	4	102	83
120	day04	MT-CO1	-0.231228	7.63763e-08	1	0.992317	2	2	4512	4	102	83
121	day04	MT-CO2	-0.212269	1.56598e-07	1	0.991463	2	2	4513	4	102	83
122	day04	HLA-A	-0.210803	0	1	1	3	3	3105	4	102	83
123	day04	LAP3	-0.208119	3.53413e-05	0.945203	0.939593	3	3	51056	4	102	83
124	day04	POU2AF1	-0.195269	1.29901e-06	0.950813	0.992358	3	3	5450	4	102	83
125	day04	HLA-DPA1	-0.185407	2.82956e-06	0.967073	0.981545	3	3	3113	4	102	83
126	day04	MX1	-0.169819	4.63973e-05	0.965691	0.98374	3	3	4599	4	102	83
127	day06-07	CXCL10	-2.61485	5.17981e-05	0.0206504	0.126341	3	3	3627	2025-06-07	50	42
128	day06-07	AURKB	-2.4106	5.59273e-07	0.0400813	0.199431	3	3	9212	2025-06-07	50	42
129	day06-07	IGHG4-secreted	-2.29273	2.64258e-06	0.110081	0.283984	3	3	3503	2025-06-07	50	42
130	day06-07	CD300A	-2.02062	9.86001e-05	0.0444715	0.162439	3	3	11314	2025-06-07	50	42
131	day06-07	CCNB1	-1.95568	0.000655594	0.0468293	0.147236	3	3	891	2025-06-07	50	42
132	day06-07	IL32	-1.88275	0	0.159919	0.524715	3	3	9235	2025-06-07	50	42
133	day06-07	CXCR3	-1.66578	1.63205e-10	0.154472	0.42935	3	3	2833	2025-06-07	50	42
134	day06-07	TK1	-1.47174	2.20693e-05	0.0965854	0.257642	3	3	7083	2025-06-07	50	42
135	day06-07	CD86	-1.43552	3.26515e-05	0.122764	0.284228	3	3	942	2025-06-07	50	42
136	day06-07	LGALS1	-1.4161	0	0.417886	0.849593	3	3	3956	2025-06-07	50	42
137	day06-07	KIAA0101	-1.4145	2.81771e-06	0.0669106	0.240976	3	3	9768	2025-06-07	50	42
138	day06-07	CD70	-1.38216	2.38732e-09	0.219106	0.480813	3	3	970	2025-06-07	50	42
139	day06-07	CD79B	-1.34391	0	0.387154	0.910407	3	3	974	2025-06-07	50	42
140	day06-07	ab-CD56	-1.34365	3.63154e-08	0.699431	0.771707	3	3	4684	2025-06-07	50	42
141	day06-07	IFITM3	-1.33469	0	0.259106	0.586016	3	3	10410	2025-06-07	50	42
142	day06-07	GPI	-1.22837	0	0.520894	0.91439	3	3	2821	2025-06-07	50	42
143	day06-07	CCND2	-1.17855	1.96691e-05	0.163008	0.343984	3	3	894	2025-06-07	50	42
144	day06-07	CD180	-1.17795	5.73851e-09	0.259919	0.520894	3	3	4064	2025-06-07	50	42
145	day06-07	ITGAL	-1.15996	0	0.440244	0.825041	3	3	3683	2025-06-07	50	42
146	day06-07	HLA-DRB3	-1.13243	1.7366e-08	0.288537	0.538862	3	3	3125	2025-06-07	50	42
147	day06-07	STAT3	-1.09131	5.07531e-07	0.241301	0.471789	3	3	6774	2025-06-07	50	42
148	day06-07	IFI44L	-1.0542	7.10814e-07	0.37	0.630854	2	2	10964	2025-06-07	50	42
149	day06-07	CD320	-1.02463	3.24099e-07	0.277073	0.511626	3	3	51293	2025-06-07	50	42
150	day06-07	LGALS9	-1.01624	6.25959e-09	0.341626	0.609593	3	3	3965	2025-06-07	50	42
151	day06-07	IGHA1-secreted	-0.998077	0	0.636748	0.975366	3	3	3493	2025-06-07	50	42
152	day06-07	TNFRSF1B	-0.99796	2.96288e-05	0.22187	0.407561	3	3	7133	2025-06-07	50	42
153	day06-07	MCM2	-0.980157	0.000762662	0.0965041	0.22626	3	3	4171	2025-06-07	50	42
154	day06-07	RELA	-0.930032	0.000485802	0.339756	0.502317	2	2	5970	2025-06-07	50	42
155	day06-07	GNAI2	-0.867255	1.92987e-08	0.400732	0.657561	3	3	2771	2025-06-07	50	42
156	day06-07	TNFRSF17	-0.853984	5.80288e-06	0.359106	0.540894	3	3	608	2025-06-07	50	42
157	day06-07	CD48	-0.834761	1.09381e-08	0.413008	0.696504	3	3	962	2025-06-07	50	42
158	day06-07	TNFSF10	-0.822343	2.13354e-07	0.391382	0.652033	3	3	8743	2025-06-07	50	42
159	day06-07	C10orf54	-0.7943	1.0916e-09	0.469919	0.753252	3	3	64115	2025-06-07	50	42
160	day06-07	IFIT3	-0.771153	8.45415e-05	0.288211	0.478537	3	3	3437	2025-06-07	50	42
161	day06-07	CD37	-0.719266	1.83007e-10	0.563252	0.868862	3	3	951	2025-06-07	50	42
162	day06-07	CASP3	-0.717579	3.54616e-05	0.366016	0.563902	3	3	836	2025-06-07	50	42
163	day06-07	ISG15	-0.690091	0	0.64252	0.963008	3	3	9636	2025-06-07	50	42
164	day06-07	ab-CD73	-0.63679	2.47507e-06	0.965488	0.971463	2	2	4907	2025-06-07	50	42
165	day06-07	ab-CD183	-0.58961	5.91242e-09	0.988049	1	2	2	2833	2025-06-07	50	42
166	day06-07	RNASE6	-0.560483	0.000116463	0.394959	0.628862	3	3	6039	2025-06-07	50	42
167	day06-07	CD81	-0.547841	6.288e-08	0.635935	0.92	3	3	975	2025-06-07	50	42
168	day06-07	ab-CD69	-0.512765	0	1	1	2	2	969	2025-06-07	50	42
169	day06-07	MZB1	-0.481684	0.000364442	0.675691	0.980244	3	3	51237	2025-06-07	50	42
170	day06-07	ab-CD71	-0.466796	0.000180105	0.990813	0.996504	3	3	7037	2025-06-07	50	42
171	day06-07	LDHA	-0.441707	3.5595e-06	0.862195	0.916341	2	2	3939	2025-06-07	50	42
172	day06-07	ab-CD45RA	-0.323233	0	1	1	3	3	5788	2025-06-07	50	42
173	day06-07	ab-CD39	-0.18431	0	1	1	3	3	953	2025-06-07	50	42
174	day06-07	HLA-A	-0.169368	0	1	1	3	3	3105	2025-06-07	50	42
175	day06-07	GAPDH	-0.143462	3.17679e-05	0.994959	0.999512	3	3	2597	2025-06-07	50	42
176	day06-07	ab-CD45	-0.101837	2.00246e-07	1	1	2	2	5788	2025-06-07	50	42
177	day07-08	IL15	-3.15714	0.000176447	0.0153659	0.106016	3	3	3600	2025-07-08	42	33
178	day07-08	CXCL10	-2.22137	0.000187337	0.0313008	0.13561	3	3	3627	2025-07-08	42	33
179	day07-08	IGHG4-secreted	-2.13118	1.34379e-05	0.110081	0.272195	3	3	3503	2025-07-08	42	33
180	day07-08	IL32	-1.9713	0	0.159919	0.529837	3	3	9235	2025-07-08	42	33
181	day07-08	CXCR3	-1.6315	1.34993e-09	0.14878	0.408537	3	3	2833	2025-07-08	42	33
182	day07-08	MCM2	-1.56527	0.000804419	0.0674797	0.178537	3	3	4171	2025-07-08	42	33
183	day07-08	CD79B	-1.36413	0	0.353821	0.898943	3	3	974	2025-07-08	42	33
184	day07-08	LGALS1	-1.32203	0	0.417805	0.84561	3	3	3956	2025-07-08	42	33
185	day07-08	ab-CD56	-1.29831	7.70667e-07	0.686829	0.769187	3	3	4684	2025-07-08	42	33
186	day07-08	IFITM3	-1.22363	0	0.270488	0.573984	3	3	10410	2025-07-08	42	33
187	day07-08	HLA-DRB3	-1.20773	4.7741e-09	0.283496	0.536585	3	3	3125	2025-07-08	42	33
188	day07-08	LAG3	-1.20188	3.89942e-05	0.17878	0.351626	3	3	3902	2025-07-08	42	33
189	day07-08	GPI	-1.12809	0	0.533577	0.89122	3	3	2821	2025-07-08	42	33
190	day07-08	CD180	-1.09084	6.45387e-08	0.265447	0.513171	3	3	4064	2025-07-08	42	33
191	day07-08	STAT3	-1.08136	5.59213e-07	0.23626	0.475528	3	3	6774	2025-07-08	42	33
192	day07-08	IFI44L	-1.0542	8.35491e-07	0.37	0.630854	2	2	10964	2025-07-08	42	33
193	day07-08	ITGAL	-1.03644	0	0.451301	0.791138	3	3	3683	2025-07-08	42	33
194	day07-08	GNAI2	-1.00536	5.85574e-10	0.346341	0.646585	3	3	2771	2025-07-08	42	33
195	day07-08	IGHA1-secreted	-0.988537	0	0.63878	0.976992	3	3	3493	2025-07-08	42	33
196	day07-08	LGALS9	-0.965879	5.25052e-08	0.33065	0.596829	3	3	3965	2025-07-08	42	33
197	day07-08	CD70	-0.933073	7.76078e-06	0.283089	0.487154	3	3	970	2025-07-08	42	33
198	day07-08	CD320	-0.918508	4.36561e-06	0.286423	0.501545	3	3	51293	2025-07-08	42	33
199	day07-08	C10orf54	-0.72585	6.45946e-08	0.469919	0.737561	3	3	64115	2025-07-08	42	33
200	day07-08	ab-CD8	-0.693029	0.000353607	0.863821	0.860813	3	3	925	2025-07-08	42	33
201	day07-08	CD37	-0.650839	1.63979e-08	0.574959	0.866504	3	3	951	2025-07-08	42	33
202	day07-08	CD48	-0.638487	1.05006e-05	0.461545	0.671951	3	3	962	2025-07-08	42	33
203	day07-08	ab-CD73	-0.63679	2.90034e-06	0.965488	0.971463	2	2	4907	2025-07-08	42	33
204	day07-08	IL23R	-0.607053	0.00010027	0.420407	0.57626	3	3	149233	2025-07-08	42	33
205	day07-08	ISG15	-0.601422	2.3965e-10	0.659675	0.96122	3	3	9636	2025-07-08	42	33
206	day07-08	ab-CD183	-0.58961	7.0021e-09	0.988049	1	2	2	2833	2025-07-08	42	33
207	day07-08	TNFSF10	-0.565885	0.000140652	0.480081	0.668537	3	3	8743	2025-07-08	42	33
208	day07-08	RNASE6	-0.559405	0.000129922	0.432927	0.645285	3	3	6039	2025-07-08	42	33
209	day07-08	ab-CD69	-0.512765	0	1	1	2	2	969	2025-07-08	42	33
210	day07-08	CD81	-0.465273	1.88192e-05	0.635447	0.910976	3	3	975	2025-07-08	42	33
211	day07-08	LDHA	-0.441707	4.17326e-06	0.862195	0.916341	2	2	3939	2025-07-08	42	33
212	day07-08	IFITM2	-0.393018	0.000295969	0.60561	0.786748	3	3	10581	2025-07-08	42	33
213	day07-08	ab-CD71	-0.39275	6.6255e-05	0.990813	0.996504	3	3	7037	2025-07-08	42	33
214	day07-08	CD52	-0.318354	0.000258658	0.807642	0.93748	3	3	1043	2025-07-08	42	33
215	day07-08	ab-CD45RA	-0.240418	7.40151e-07	1	1	3	3	5788	2025-07-08	42	33
216	day07-08	ab-CD39	-0.178615	0	1	1	3	3	953	2025-07-08	42	33
217	day07-08	HLA-A	-0.172255	0	1	1	3	3	3105	2025-07-08	42	33
218	day07-08	ab-CD45	-0.101837	2.36346e-07	1	1	2	2	5788	2025-07-08	42	33
219	day10	CD300A	-2.86242	9.60521e-07	0.0380488	0.187236	3	3	11314	10	44	35
220	day10	IGHG4-secreted	-1.94119	6.56496e-05	0.124146	0.273171	3	3	3503	10	44	35
221	day10	IFITM3	-1.76222	0	0.222276	0.682683	3	3	10410	10	44	35
222	day10	CCR1	-1.68727	0.000223221	0.056748	0.177154	3	3	1230	10	44	35
223	day10	CXCR3	-1.62468	5.48868e-09	0.14122	0.387724	3	3	2833	10	44	35
224	day10	LGALS1	-1.51914	0	0.354715	0.766911	3	3	3956	10	44	35
225	day10	CCR2	-1.50289	1.77156e-06	0.068374	0.247886	3	3	729230	10	44	35
226	day10	IL32	-1.49923	0	0.212358	0.503333	3	3	9235	10	44	35
227	day10	CD180	-1.47132	1.67407e-09	0.179024	0.44	3	3	4064	10	44	35
228	day10	CD79B	-1.37461	0	0.340163	0.877073	3	3	974	10	44	35
229	day10	LGALS9	-1.29182	0	0.236748	0.558862	3	3	3965	10	44	35
230	day10	CD70	-1.2877	6.98157e-08	0.162276	0.408049	3	3	970	10	44	35
231	day10	GPI	-1.22709	0	0.48374	0.857805	3	3	2821	10	44	35
232	day10	IFI44L	-1.15274	7.15983e-06	0.324024	0.545	2	2	10964	10	44	35
233	day10	ITGAL	-1.05365	0	0.381057	0.726423	3	3	3683	10	44	35
234	day10	ab-CD56	-1.00686	7.34326e-07	0.816748	0.851951	3	3	4684	10	44	35
235	day10	LAG3	-0.972947	6.7173e-06	0.203333	0.412683	3	3	3902	10	44	35
236	day10	CD320	-0.947701	1.06969e-06	0.267398	0.497805	3	3	51293	10	44	35
237	day10	IGHA1-secreted	-0.939659	0	0.606667	0.966911	3	3	3493	10	44	35
238	day10	SELPLG	-0.877297	4.7176e-06	0.335854	0.532764	3	3	6404	10	44	35
239	day10	GNAI2	-0.828939	1.48701e-06	0.299756	0.544959	3	3	2771	10	44	35
240	day10	LDHA	-0.823745	0	0.759634	0.924146	2	2	3939	10	44	35
241	day10	C10orf54	-0.792526	1.96781e-08	0.436179	0.722439	3	3	64115	10	44	35
242	day10	ab-CD8	-0.785342	4.74134e-05	0.871789	0.880813	3	3	925	10	44	35
243	day10	RNASE6	-0.732885	7.10526e-06	0.352276	0.613577	3	3	6039	10	44	35
244	day10	HLA-DRB3	-0.722423	0.000557758	0.303496	0.472439	3	3	3125	10	44	35
245	day10	CD37	-0.707135	1.95383e-09	0.525854	0.823902	3	3	951	10	44	35
246	day10	ab-CD73	-0.705255	1.05123e-05	0.864756	0.936341	2	2	4907	10	44	35
247	day10	IFIT3	-0.685134	0.000275297	0.391951	0.568862	3	3	3437	10	44	35
248	day10	LGALS3	-0.66098	2.07433e-06	0.456911	0.714715	3	3	3958	10	44	35
249	day10	TNFSF10	-0.660852	2.21215e-05	0.444797	0.662683	3	3	8743	10	44	35
250	day10	ISG15	-0.617309	0	0.705203	0.982195	3	3	9636	10	44	35
251	day10	IFITM2	-0.61622	7.36123e-07	0.533415	0.764472	3	3	10581	10	44	35
252	day10	ab-CD183	-0.61515	5.92848e-10	0.989878	0.99939	2	2	2833	10	44	35
253	day10	CD81	-0.573429	1.48917e-07	0.598943	0.901382	3	3	975	10	44	35
254	day10	ab-CD69	-0.494726	0	1	1	2	2	969	10	44	35
255	day10	MZB1	-0.46035	0.000109966	0.666667	0.978374	3	3	51237	10	44	35
256	day10	IGHG3-secreted	-0.38639	0.00129847	0.607317	0.761057	3	3	3502	10	44	35
257	day10	LY6E	-0.306622	2.83404e-06	0.936463	0.992927	2	2	4061	10	44	35
258	day10	ab-CD45RA	-0.224188	6.47908e-07	1	1	3	3	5788	10	44	35
259	day10	ab-CD39	-0.178951	0	1	1	3	3	953	10	44	35
260	day10	HLA-A	-0.108628	1.47188e-05	1	1	3	3	3105	10	44	35
261	day10	ab-CD45	-0.0977992	5.87047e-06	1	1	2	2	5788	10	44	35
262	day10	KIAA0101	0	2.68439e-05	0	0.0858537	3	3	9768	10	44	35
263	day12-14	CCR1	-2.55346	3.54516e-05	0.0357724	0.157805	3	3	1230	2025-12-14	37	28
264	day12-14	IL32	-2.29441	0	0.155041	0.56122	3	3	9235	2025-12-14	37	28
265	day12-14	ab-CD89	-2.1772	0.00148933	0.62561	0.702195	3	3	2204	2025-12-14	37	28
266	day12-14	IGHG4-secreted	-2.12958	1.70095e-06	0.162683	0.348211	3	3	3503	2025-12-14	37	28
267	day12-14	CD300A	-1.89344	8.25798e-05	0.061626	0.192195	3	3	11314	2025-12-14	37	28
268	day12-14	CXCR3	-1.68667	2.77408e-08	0.158293	0.38748	3	3	2833	2025-12-14	37	28
269	day12-14	LGALS1	-1.62175	0	0.331707	0.781545	3	3	3956	2025-12-14	37	28
270	day12-14	CCR2	-1.47937	4.54745e-05	0.104309	0.259593	3	3	729230	2025-12-14	37	28
271	day12-14	CD79B	-1.29757	0	0.429512	0.875528	3	3	974	2025-12-14	37	28
272	day12-14	IFITM3	-1.24714	0	0.318943	0.633252	3	3	10410	2025-12-14	37	28
273	day12-14	ab-CD56	-1.23948	2.61041e-06	0.751138	0.784065	3	3	4684	2025-12-14	37	28
274	day12-14	IFIT3	-1.13039	6.33886e-08	0.301463	0.552764	3	3	3437	2025-12-14	37	28
275	day12-14	HLA-DRB3	-1.09484	3.62469e-05	0.282358	0.445122	3	3	3125	2025-12-14	37	28
276	day12-14	LAG3	-1.06395	1.33025e-05	0.221301	0.416016	3	3	3902	2025-12-14	37	28
277	day12-14	LGALS9	-1.06268	1.40345e-08	0.314472	0.575935	3	3	3965	2025-12-14	37	28
278	day12-14	GPI	-1.04083	0	0.490569	0.794472	3	3	2821	2025-12-14	37	28
279	day12-14	ITGAL	-1.01601	0	0.419593	0.709756	3	3	3683	2025-12-14	37	28
280	day12-14	CD180	-0.967537	1.40676e-05	0.237967	0.437805	3	3	4064	2025-12-14	37	28
281	day12-14	CCND2	-0.932848	0.000249726	0.150081	0.306667	3	3	894	2025-12-14	37	28
282	day12-14	ab-CD8	-0.921829	4.99164e-08	0.854553	0.886585	3	3	925	2025-12-14	37	28
283	day12-14	CD320	-0.829546	0.000204641	0.274797	0.44748	3	3	51293	2025-12-14	37	28
284	day12-14	IL23R	-0.827428	0.000453237	0.308049	0.451545	3	3	149233	2025-12-14	37	28
285	day12-14	IGHA1-secreted	-0.693494	3.78264e-10	0.686098	0.957642	3	3	3493	2025-12-14	37	28
286	day12-14	C10orf54	-0.688189	1.04436e-06	0.481951	0.741545	3	3	64115	2025-12-14	37	28
287	day12-14	TNFSF10	-0.641058	0.000178424	0.52187	0.635041	3	3	8743	2025-12-14	37	28
288	day12-14	ISG15	-0.612986	9.11651e-10	0.674878	0.961301	3	3	9636	2025-12-14	37	28
289	day12-14	CD37	-0.550525	2.18909e-06	0.560732	0.817642	3	3	951	2025-12-14	37	28
290	day12-14	IFITM2	-0.50382	7.92243e-05	0.603415	0.762276	3	3	10581	2025-12-14	37	28
291	day12-14	MZB1	-0.482139	0.00108401	0.656911	0.981301	3	3	51237	2025-12-14	37	28
292	day12-14	CD81	-0.46944	2.22456e-05	0.642764	0.902195	3	3	975	2025-12-14	37	28
293	day12-14	ab-CD69	-0.465711	9.54207e-09	1	1	2	2	969	2025-12-14	37	28
294	day12-14	ab-CD183	-0.441796	1.2267e-08	1	1	2	2	2833	2025-12-14	37	28
295	day12-14	LY6E	-0.286088	7.09391e-05	0.948537	0.982317	2	2	4061	2025-12-14	37	28
296	day12-14	ab-CD45	-0.232106	5.5778e-06	1	1	2	2	5788	2025-12-14	37	28
297	day12-14	ab-CD45RA	-0.22632	1.22049e-05	1	1	3	3	5788	2025-12-14	37	28
298	day12-14	HLA-A	-0.171671	1.44027e-09	1	0.999919	3	3	3105	2025-12-14	37	28
299	day12-14	ab-CD39	-0.1015	4.6213e-05	1	1	3	3	953	2025-12-14	37	28
