# Supplementary material for: Young children have limited mucosal immunity when stimulated with an influenza vaccine in tonsil organoids
Source: Research Square preprint supplement (doi:10.21203/rs.3.rs-7842732/v1), 2025-10-30
Supplement: Supplementary file 3 [file 6fd07cbd1d6a94cdb8e7c912.xlsx]

## Sheet: Sheet1
group	donorID	date sample	collection	gender	age	Ethnicity/Race	Indication	Indication2	flu info
Toddlers	IMD030		19	F	2	Caucasian			no
	IMD082		19	M	2	Caucasian	sleep-disordered breathing	OSA
	IMD085		19	M	2	Asian	Obstructive Sleep Apnea	OSA	flu vaccine
	IMD035		19	F	3	Asian	Hypertrophy of Tonsils	OSA	flu vaccine
	PED031	2021-12-09	21	F	3		OSA, hypertrophy	OSA	flu vaccine
	PED020	2021-09-09	20	F	4	Caucasian	Obstructive Sleep Apnea	OSA	flu vaccine
	IMD195	2022-11-11	22	M	4	Filipino/African American	Obstructive Sleep Apnea	OSA
	PED036	2022-02-03	21	M	4	Caucasian	OSA, hypertrophy	OSA	flu vaccine
	PED058	2022-11-08	22	M	4	Hispanic/Latino	Obstructive Sleep Apnea	OSA	flu vaccine
	PED016	2021-05-20	20	M	3	Caucasian	Hypertrophy of Tonsils	OSA	flu vaccine
Adults	VIP125	2023-05-24	22	M	19	Caucasian	Hypertrophy of Tonsils	OSA
	VIP031	2021-02-04	20	F	27
	VIP116	2023-03-15	22	F	26	Hispanic/Latino	Obstructive Sleep Apnea	OSA
	VIP131	2023-06-14	22	F	31	Hispanic/Latino	Obstructive Sleep Apnea	OSA	flu vaccine
	VIP024	2020-09-30	19	M	33	Caucasian	Obstructive Sleep Apnea	OSA	flu vaccine
	VIP120	2023-04-05	22	M	35	Caucasian	Obstructive Sleep Apnea	OSA
	VIP015	2020-06-24	19	M	39	Caucasian	Obstructive Sleep Apnea	OSA
	VIP022	2020-09-02	19	M	39	Caucasian	Obstructive Sleep Apnea	OSA	flu vaccine
	VIP061	2021-09-01	20	M	21	Caucasian	Tonsillitis	Tonsillitis
	VIP038	2021-03-24	20	M	33	Caucasian	Obstructive Sleep Apnea	OSA
Older Children	IMD170		19	M	7
	IMD150		19	F	7	Hispanic	OSA, hypertrophy	OSA	flu vaccine
	IMD107		19	M	9	Hispanic	tonsillitis	tonsillitis	flu vaccine
	PED041	2022-04-14	21	M	7	Asian	Hypertrophy of Tonsils	OSA	flu vaccine
	IMD155		19	F	7
	IMD188	2021-12-14	21	F	8	Hispanic/Latino	Obstructive Sleep Apnea	OSA	no
	PED066	2023-03-09	22	M	8	Hispanic/Latino	Hypertrophy of Tonsils	OSA
	PED024	2021-10-08	20	M	9	Hispanic/Latino	OSA, hypertrophy	OSA
	PED049	2022-08-04	21	M	9	Hispanic/Latino	Hypertrophy of Tonsils	OSA	flu vaccine
	IMD172	2021-06-11	20	F	11	Caucasian	Obstructive Sleep Apnea	OSA	flu vaccine
	IMD173	2021-06-21	20	M	11	Hispanic/Latino	Obstructive Sleep Apnea	OSA	no
	IMD012		19	M	9	Hispanic/Latino	Hypertrophy of Tonsils	OSA	flu vaccine
