# Supplementary material for: Young children have limited mucosal immunity when stimulated with an influenza vaccine in tonsil organoids
Source: Research Square preprint supplement (doi:10.21203/rs.3.rs-7842732/v1), 2025-10-30
Supplement: Supplementary file 4 [file 75789456a2cc480060c5564a.xlsx]

## Sheet: Tcell adult downregulation
	day_group	marker	log2FC_mean	pval_adj_mean	pct1_mean	pct2_mean	n1	n2	ENTREZID	days	n_significant	n_distinct
1	day0	ASCL2	3.82836	2.38747e-10	0.0512889	0.00133333	3	3	430	0	74	49
2	day0	NRP1	3.2403	1.39878e-05	0.0311111	0.00291111	3	3	8829	0	74	49
3	day0	MME	2.86278	0.000112249	0.0247778	0.00217778	3	3	4311	0	74	49
4	day0	CXCL13	2.74927	2.04221e-46	0.320244	0.0563333	3	3	10563	0	74	49
5	day0	PYCR1	2.02459	0.000169151	0.0397778	0.0102667	3	3	5831	0	74	49
6	day0	IL21	1.93146	1.55632e-29	0.287667	0.0800667	3	3	59067	0	74	49
7	day0	LYN	1.85565	1.5893e-09	0.0991333	0.0267333	3	3	4067	0	74	49
8	day0	LAT2	1.76474	0.00043225	0.0395778	0.0115333	3	3	7462	0	74	49
9	day0	BCL6	1.73583	2.57049e-36	0.374689	0.118978	3	3	604	0	74	49
10	day0	TRGC2	1.70955	5.53951e-19	0.224867	0.0722889	3	3	6967	0	74	49
11	day0	POU2AF1	1.67416	3.30451e-41	0.429133	0.146133	3	3	5450	0	74	49
12	day0	CXCR5	1.56747	6.39755e-76	0.649489	0.251089	3	3	643	0	74	49
13	day0	TARP-refseq	1.3523	1.73749e-07	0.113689	0.0435111	3	3	445347	0	74	49
14	day0	EGR1	1.34675	3.30431e-26	0.377822	0.160333	3	3	1958	0	74	49
15	day0	B3GAT1	1.31885	0.000453536	0.0615556	0.0255556	3	3	27087	0	74	49
16	day0	PDCD1	1.29096	1.01759e-33	0.4648	0.202067	3	3	5133	0	74	49
17	day0	ab-TCR-alpha-beta	1.25497	3.68179e-54	0.982222	0.8404	3	3	28755	0	74	49
18	day0	CHI3L2	1.19557	1.56614e-39	0.561356	0.254378	3	3	1117	0	74	49
19	day0	LIF	1.18605	0.00120241	0.0612667	0.0274889	3	3	3976	0	74	49
20	day0	CD200	1.18176	1.68519e-14	0.2732	0.127867	3	3	4345	0	74	49
21	day0	IKZF2	1.14514	5.92558e-05	0.0957111	0.0449778	3	3	22807	0	74	49
22	day0	ab-CD278	1.04289	1.70043e-70	0.988911	0.960733	3	2	29851	0	74	49
23	day0	IRF8	1.03273	9.33321e-05	0.0982667	0.0468667	3	3	3394	0	74	49
24	day0	CD79A	1.02694	7.21196e-14	0.305333	0.1514	3	3	973	0	74	49
25	day0	CD58	1.00161	1.10045e-05	0.136022	0.0707111	3	3	965	0	74	49
26	day0	TIGIT	0.999347	5.51974e-18	0.381711	0.198111	3	3	201633	0	74	49
27	day0	ab-CD279	0.976362	2.59996e-133	1	0.987111	3	3	5133	0	74	49
28	day0	BNIP3L	0.975529	6.45053e-10	0.239378	0.122333	3	3	665	0	74	49
29	day0	GATA3	0.921168	1.00011e-06	0.180244	0.0968222	3	3	2625	0	74	49
30	day0	CBLB	0.841637	9.77711e-08	0.228133	0.126244	3	3	868	0	74	49
31	day0	ab-CXCR5	0.836279	1.91225e-62	0.988622	0.956911	3	3	643	0	74	49
32	day0	BTLA	0.801491	3.28841e-07	0.228911	0.131578	3	3	151888	0	74	49
33	day0	IGHM-membrane	0.782306	1.03108e-05	0.195689	0.119333	3	3	3507	0	74	49
34	day0	IL10	0.76816	3.63426e-17	0.483844	0.304578	3	3	3586	0	74	49
35	day0	ALDOC	0.737522	1.18077e-06	0.236844	0.141356	3	3	230	0	74	49
36	day0	ATF6B	0.737292	4.14715e-05	0.179422	0.107867	3	3	1388	0	74	49
37	day0	TRIB2	0.726899	2.4153e-16	0.505578	0.314711	3	3	28951	0	74	49
38	day0	BCL2A1	0.717598	3.51359e-05	0.190956	0.117089	3	3	597	0	74	49
39	day0	CD59	0.717002	3.02297e-05	0.1978	0.1214	3	3	966	0	74	49
40	day0	HLA-DMA	0.659319	4.10101e-05	0.207822	0.127778	3	3	3108	0	74	49
41	day0	LTA	0.650386	4.39249e-05	0.209533	0.130556	3	3	4049	0	74	49
42	day0	NFATC2	0.648376	1.00557e-07	0.324111	0.212956	3	3	4773	0	74	49
43	day0	IL6R	0.631576	5.10025e-10	0.407711	0.268511	3	3	3570	0	74	49
44	day0	CD28	0.620729	8.72509e-07	0.310067	0.2014	3	3	940	0	74	49
45	day0	CD84	0.615064	0.000175558	0.211711	0.140933	3	3	8832	0	74	49
46	day0	CD8B	0.572234	0.000141634	0.225889	0.150044	3	3	926	0	74	49
47	day0	ICOS	0.566185	3.29184e-10	0.485044	0.329578	3	3	29851	0	74	49
48	day0	PASK	0.535793	2.18822e-11	0.538622	0.380378	3	3	23178	0	74	49
49	day0	XBP1	0.527902	8.78699e-06	0.335	0.230867	3	3	7494	0	74	49
50	day0	ab-CD38	0.495241	1.44873e-50	1	1	3	3	952	0	74	49
51	day0	IL2RB	0.481006	1.62853e-18	0.7326	0.5416	3	3	3560	0	74	49
52	day0	ab-CD20	0.464262	1.00224e-48	0.999289	0.983778	3	3	931	0	74	49
53	day0	ab-CD19	0.459154	2.1272e-08	0.816	0.698222	3	3	930	0	74	49
54	day0	NFKB1	0.435944	0.000193237	0.334244	0.249178	3	3	4790	0	74	49
55	day0	TPI1	0.428631	3.16912e-13	0.672111	0.519689	3	3	7167	0	74	49
56	day0	TCF7	0.40592	3.99553e-10	0.689689	0.522467	3	3	6932	0	74	49
57	day0	ab-Tim3	0.374719	6.80498e-09	0.988622	0.973867	3	3	84868	0	74	49
58	day0	CD4	0.340916	1.1185e-12	0.753311	0.613889	3	3	920	0	74	49
59	day0	ENO1	0.319132	1.31469e-16	0.807933	0.690622	3	3	2023	0	74	49
60	day0	FYN	0.308963	8.2673e-12	0.836111	0.685667	3	3	2534	0	74	49
61	day0	ab-CD21	0.306368	6.20157e-09	0.978967	0.958633	2	2	1380	0	74	49
62	day0	ab-CD69	0.275749	1.11052e-23	1	1	2	2	969	0	74	49
63	day0	ab-HLA-DR	0.255542	7.69797e-25	1	1	3	2	3122	0	74	49
64	day0	ab-CD27	0.239119	1.46058e-43	1	1	3	3	939	0	74	49
65	day0	CD27	0.227438	2.96054e-06	0.800444	0.690022	3	3	939	0	74	49
66	day0	GAPDH	0.209357	3.253e-39	0.967667	0.903956	3	3	2597	0	74	49
67	day0	ITGB2	0.173701	3.3251e-05	0.857733	0.766867	3	3	3689	0	74	49
68	day0	LCK	0.168571	2.81998e-08	0.910822	0.828489	3	3	3932	0	74	49
69	day0	ab-CD45RO	0.140293	4.7893e-07	0.997289	0.993467	3	3	5788	0	74	49
70	day0	TRBC2	0.110861	9.35405e-11	0.978978	0.943067	3	3	28638	0	74	49
71	day0	CD3D	0.0907668	1.11812e-07	0.969667	0.937778	3	3	915	0	74	49
72	day0	CD52	0.0735815	2.25436e-05	0.952178	0.930022	3	3	1043	0	74	49
73	day0	MT-CO1	0.0552847	1.47084e-11	1	0.9946	2	2	4512	0	74	49
74	day0	HLA-A	0.034058	3.60471e-13	1	1	3	3	3105	0	74	49
75	day04	CD109	2.69448	1.06919e-07	0.0547111	0.00895556	3	3	135228	04	138	100
76	day04	IL26	2.59854	7.57192e-06	0.0472667	0.0105556	3	3	55801	04	138	100
77	day04	MME	2.58412	0.000166664	0.0283111	0.00448889	3	3	4311	04	138	100
78	day04	HMMR	2.41073	7.45056e-09	0.0777778	0.0179111	3	3	3161	04	138	100
79	day04	CCNB1	2.34337	3.11102e-13	0.122533	0.0296444	3	3	891	04	138	100
80	day04	ADGRG1	2.13179	6.46809e-35	0.304889	0.0734	3	3	9289	04	138	100
81	day04	IL21	2.04949	3.63154e-17	0.167067	0.0425556	3	3	59067	04	138	100
82	day04	FLT1	2.01167	0.000312505	0.0360222	0.00946667	3	3	2321	04	138	100
83	day04	IKZF2	1.97446	2.68086e-17	0.161311	0.0369778	3	3	22807	04	138	100
84	day04	MKI67	1.9272	6.39639e-07	0.0737333	0.0221556	3	3	4288	04	138	100
85	day04	ASCL2	1.80581	8.75668e-10	0.0456444	0.000466667	3	3	430	04	138	100
86	day04	GAB2	1.78517	1.59572e-10	0.106667	0.0279333	3	3	9846	04	138	100
87	day04	PDCD1	1.71381	2.77101e-24	0.275422	0.0866	3	3	5133	04	138	100
88	day04	KIAA0101	1.71211	7.8339e-15	0.184	0.0627556	3	3	9768	04	138	100
89	day04	NRP1	1.68503	1.61593e-11	0.0543556	0.000488889	3	3	8829	04	138	100
90	day04	CCR5	1.66344	5.07161e-12	0.142067	0.0438667	3	3	1234	04	138	100
91	day04	ab-TCR-alpha-beta	1.65941	3.27371e-24	0.910978	0.841156	3	3	28755	04	138	100
92	day04	EGR3	1.65914	6.96853e-10	0.117844	0.0373111	3	3	1960	04	138	100
93	day04	CXCL13	1.65267	9.37403e-88	0.7118	0.284067	3	3	10563	04	138	100
94	day04	VPREB3	1.6294	0.000115834	0.0406889	0.0104667	3	3	29802	04	138	100
95	day04	LYN	1.55788	3.89776e-12	0.143133	0.0433333	3	3	4067	04	138	100
96	day04	HAVCR2	1.53201	1.41041e-09	0.130844	0.0470444	3	3	84868	04	138	100
97	day04	POU2AF1	1.49452	1.64175e-37	0.450778	0.161311	3	3	5450	04	138	100
98	day04	CD200	1.45815	5.38232e-31	0.409067	0.157089	3	3	4345	04	138	100
99	day04	DUSP4	1.37003	3.79327e-14	0.206044	0.0763778	3	3	1846	04	138	100
100	day04	HNRNPLL	1.3661	2.63081e-19	0.284822	0.110356	3	3	92906	04	138	100
101	day04	PTTG2	1.36352	3.86139e-16	0.245178	0.0970889	3	3	10744	04	138	100
102	day04	TOP2A	1.35597	1.82359e-10	0.1682	0.0685111	3	3	7153	04	138	100
103	day04	CD58	1.3535	2.18589e-22	0.330378	0.131689	3	3	965	04	138	100
104	day04	CD38	1.29037	1.48251e-08	0.134667	0.0535111	3	3	952	04	138	100
105	day04	TIGIT	1.2245	1.66192e-49	0.652422	0.283133	3	3	201633	04	138	100
106	day04	ATF6B	1.22202	2.63612e-17	0.282556	0.110711	3	3	1388	04	138	100
107	day04	CD59	1.21387	7.02802e-27	0.434067	0.182911	3	3	966	04	138	100
108	day04	TRGC2	1.20267	4.25783e-11	0.194667	0.0817333	3	3	6967	04	138	100
109	day04	ZBED2	1.12141	6.98109e-06	0.114911	0.0538	3	3	79413	04	138	100
110	day04	CTLA4	1.12112	2.13172e-28	0.4912	0.226244	3	3	1493	04	138	100
111	day04	TYMS	1.11265	1.35937e-09	0.210533	0.106644	3	3	7298	04	138	100
112	day04	UBE2C	1.10968	1.69082e-05	0.108356	0.0512667	3	3	11065	04	138	100
113	day04	PMCH	1.1065	0.000177577	0.0690667	0.0288444	3	3	5367	04	138	100
114	day04	IRF8	1.08928	8.49233e-08	0.135578	0.0557556	3	3	3394	04	138	100
115	day04	CD47	1.0855	0.000473386	0.0592889	0.0244	3	3	961	04	138	100
116	day04	GATA3	1.07846	5.04968e-11	0.210778	0.0900444	3	3	2625	04	138	100
117	day04	ITGB1	1.07192	1.34833e-15	0.3148	0.146733	3	3	3688	04	138	100
118	day04	ab-CD279	1.0342	3.51011e-154	1	0.984067	3	3	5133	04	138	100
119	day04	CHI3L2	1.02399	6.27767e-25	0.489911	0.237533	3	3	1117	04	138	100
120	day04	TK1	1.01534	5.95526e-08	0.171289	0.0815778	3	3	7083	04	138	100
121	day04	BTLA	1.01441	2.31018e-16	0.357156	0.177867	3	3	151888	04	138	100
122	day04	BCL6	0.983606	1.92675e-19	0.427089	0.208156	3	3	604	04	138	100
123	day04	CD226	0.960682	1.06059e-06	0.157378	0.0795778	3	3	10666	04	138	100
124	day04	CD84	0.954857	3.21074e-14	0.327533	0.157578	3	3	8832	04	138	100
125	day04	PYCR1	0.95031	6.95642e-07	0.145267	0.0681556	3	3	5831	04	138	100
126	day04	MCM4	0.943394	3.02452e-06	0.149956	0.0772889	3	3	4173	04	138	100
127	day04	MCM2	0.919858	1.43835e-07	0.192244	0.101333	3	3	4171	04	138	100
128	day04	CBLB	0.904967	5.85665e-22	0.514667	0.269511	3	3	868	04	138	100
129	day04	CD8B	0.897859	3.58241e-11	0.286889	0.149467	3	3	926	04	138	100
130	day04	TARP-refseq	0.881043	0.000121579	0.106111	0.0539556	3	3	445347	04	138	100
131	day04	ab-CD278	0.870574	2.24878e-75	0.993311	0.9782	3	2	29851	04	138	100
132	day04	CPT1A	0.861478	5.47713e-05	0.177833	0.0919	2	2	1374	04	138	100
133	day04	CXCR5	0.849309	1.43902e-27	0.620956	0.348067	3	3	643	04	138	100
134	day04	ab-Tim3	0.811915	1.47857e-27	0.974556	0.935822	3	3	84868	04	138	100
135	day04	FBXO22	0.810823	5.38641e-06	0.144333	0.0714889	3	3	26263	04	138	100
136	day04	PSEN1	0.793276	0.000124863	0.111511	0.0569778	3	3	5663	04	138	100
137	day04	TNFRSF18	0.781363	3.66087e-05	0.163178	0.0951111	3	3	8784	04	138	100
138	day04	STAT4	0.775719	3.72438e-12	0.371511	0.2046	3	3	6775	04	138	100
139	day04	IGHM-membrane	0.754269	4.66767e-07	0.235467	0.137444	3	3	3507	04	138	100
140	day04	REL	0.744776	0.000153113	0.222133	0.1359	2	2	5966	04	138	100
141	day04	ITGA4	0.737139	2.90015e-10	0.3374	0.189778	3	3	3676	04	138	100
142	day04	NFATC3	0.736256	3.14171e-09	0.290578	0.157489	3	3	4775	04	138	100
143	day04	SLAMF1	0.721211	1.02109e-06	0.230689	0.133733	3	3	6504	04	138	100
144	day04	CNOT2	0.712402	3.5494e-10	0.3388	0.183378	3	3	4848	04	138	100
145	day04	TBX21	0.692869	0.000200679	0.131444	0.0740222	3	3	30009	04	138	100
146	day04	KLRB1	0.684961	1.10705e-10	0.3784	0.2162	3	3	3820	04	138	100
147	day04	DNAJB11	0.675988	9.94936e-05	0.2424	0.1466	2	2	51726	04	138	100
148	day04	HLA-DMA	0.670138	3.87899e-08	0.276	0.151222	3	3	3108	04	138	100
149	day04	CD79A	0.670126	2.27605e-07	0.236489	0.126422	3	3	973	04	138	100
150	day04	TNFSF8	0.654719	5.67135e-10	0.389311	0.232156	3	3	944	04	138	100
151	day04	BCL2A1	0.652576	2.76119e-06	0.240422	0.142133	3	3	597	04	138	100
152	day04	TRIB2	0.642945	1.38472e-10	0.435044	0.258622	3	3	28951	04	138	100
153	day04	AIM2	0.637486	4.04304e-06	0.216733	0.1232	3	3	9447	04	138	100
154	day04	CXCL5	0.632112	3.04685e-08	0.322844	0.186267	3	3	6374	04	138	100
155	day04	CD28	0.630193	7.0093e-09	0.3578	0.205733	3	3	940	04	138	100
156	day04	ab-IgG	0.622611	8.84328e-09	0.857622	0.771044	3	3	3500	04	138	100
157	day04	DDIT4	0.609648	3.82436e-19	0.710356	0.458778	3	3	54541	04	138	100
158	day04	KDELR1	0.605996	5.5066e-08	0.311311	0.173867	3	3	10945	04	138	100
159	day04	IL10	0.595708	1.21121e-13	0.5384	0.379044	3	3	3586	04	138	100
160	day04	ICOS	0.567339	6.50552e-14	0.642556	0.420422	3	3	29851	04	138	100
161	day04	PASK	0.56507	1.94668e-26	0.813933	0.5696	3	3	23178	04	138	100
162	day04	PCNA	0.563708	1.2834e-06	0.353756	0.236111	3	3	5111	04	138	100
163	day04	IRF4	0.55525	0.000470158	0.197822	0.131289	3	3	3662	04	138	100
164	day04	NFKB1	0.543141	6.97382e-13	0.668133	0.444378	3	3	4790	04	138	100
165	day04	ab-CD158e1	0.533971	8.97e-07	0.383956	0.257133	3	3	3811	04	138	100
166	day04	HMGB2	0.516293	2.34724e-09	0.582156	0.424022	3	3	3148	04	138	100
167	day04	TNFRSF1A	0.51097	3.57026e-05	0.258578	0.165867	3	3	7132	04	138	100
168	day04	DUSP2	0.510753	4.63652e-07	0.421911	0.292844	3	3	1844	04	138	100
169	day04	NFATC2	0.507066	1.08848e-06	0.363267	0.228778	3	3	4773	04	138	100
170	day04	PDIA6	0.505812	4.01366e-10	0.6274	0.418	3	3	10130	04	138	100
171	day04	ITGAE	0.505112	1.15862e-05	0.318711	0.208578	3	3	3682	04	138	100
172	day04	TNFRSF1B	0.504582	7.02816e-09	0.543	0.363089	3	3	7133	04	138	100
173	day04	BNIP3L	0.500266	7.83171e-09	0.517178	0.355511	3	3	665	04	138	100
174	day04	CD4	0.500038	7.26837e-31	0.855933	0.640711	3	3	920	04	138	100
175	day04	LGALS3	0.483774	2.34549e-05	0.317756	0.211178	3	3	3958	04	138	100
176	day04	CD3G	0.475934	7.81582e-10	0.623289	0.432467	3	3	917	04	138	100
177	day04	IFI6	0.447907	2.64631e-24	0.861044	0.651578	3	3	2537	04	138	100
178	day04	FAS	0.447654	2.43042e-05	0.332489	0.218644	3	3	355	04	138	100
179	day04	CD27	0.441838	5.57937e-11	0.697444	0.505089	3	3	939	04	138	100
180	day04	ab-CD19	0.431183	4.12209e-13	0.9014	0.776244	3	3	930	04	138	100
181	day04	ab-CD38	0.419575	2.72373e-72	1	1	3	3	952	04	138	100
182	day04	IL6R	0.419568	0.000206398	0.301956	0.203578	3	3	3570	04	138	100
183	day04	CLEC2D	0.414818	1.9027e-06	0.548467	0.393333	3	3	29121	04	138	100
184	day04	LTA	0.39932	0.000338689	0.294533	0.201978	3	3	4049	04	138	100
185	day04	IL2RB	0.396131	2.66754e-14	0.856133	0.648978	3	3	3560	04	138	100
186	day04	ab-CD21	0.38891	1.46656e-12	0.9396	0.835767	2	2	1380	04	138	100
187	day04	TNFRSF4	0.380967	0.000274503	0.352911	0.262844	3	3	7293	04	138	100
188	day04	BIRC3	0.37992	9.22902e-06	0.526689	0.384289	3	3	330	04	138	100
189	day04	TIAF1	0.373431	0.000159719	0.390378	0.271778	3	3	9220	04	138	100
190	day04	ab-CD20	0.372854	4.04457e-23	0.993444	0.968667	3	3	931	04	138	100
191	day04	ab-CD71	0.346934	0.00020764	0.960689	0.9412	3	3	7037	04	138	100
192	day04	STAT1	0.33689	3.01354e-05	0.684644	0.512978	3	3	6772	04	138	100
193	day04	OAS1	0.335218	1.74836e-12	0.860311	0.688244	3	3	4938	04	138	100
194	day04	ITGB2	0.292608	0.000246463	0.783111	0.608867	3	3	3689	04	138	100
195	day04	LAP3	0.280078	0.000125631	0.734089	0.5872	3	3	51056	04	138	100
196	day04	ab-CD27	0.271406	2.68841e-34	1	0.9994	3	3	939	04	138	100
197	day04	CD164	0.267145	1.0738e-06	0.861133	0.708044	3	3	8763	04	138	100
198	day04	ab-CD69	0.236922	1.71282e-17	1	0.9991	2	2	969	04	138	100
199	day04	ab-CXCR5	0.232612	1.65559e-10	0.997689	0.985156	3	3	643	04	138	100
200	day04	S100A4	0.226954	4.12735e-05	0.816356	0.696689	3	3	6275	04	138	100
201	day04	ab-CD45RO	0.205899	5.71192e-13	0.996622	0.987356	3	3	5788	04	138	100
202	day04	ab-CD4	0.190347	3.47488e-28	1	0.998578	3	3	920	04	138	100
203	day04	FYN	0.187516	2.0169e-08	0.9532	0.850622	3	3	2534	04	138	100
204	day04	CD3D	0.176217	2.73461e-09	0.941933	0.8532	3	3	915	04	138	100
205	day04	ab-CD25	0.175714	2.63094e-06	0.998933	0.999333	3	3	3559	04	138	100
206	day04	MX1	0.174609	1.05907e-19	0.974822	0.906022	3	3	4599	04	138	100
207	day04	TRBC2	0.171356	4.05467e-17	0.988844	0.936333	3	3	28638	04	138	100
208	day04	ab-HLA-DR	0.168998	4.49592e-20	1	1	3	2	3122	04	138	100
209	day04	TRAC	0.112213	1.29804e-08	0.984822	0.939711	3	3	28755	04	138	100
210	day04	LCK	0.104464	1.54459e-05	0.955978	0.901578	3	3	3932	04	138	100
211	day04	ab-CD45	0.0822489	3.6658e-25	1	1	2	2	5788	04	138	100
212	day04	ab-CD3	0.0636634	2.36901e-05	1	0.999111	3	3	916	04	138	100
213	day06-07	ASCL2	2.6055	1.14018e-07	0.0366667	0.000844444	3	3	430	06-07	92	57
214	day06-07	ADGRG1	2.35868	1.5199e-31	0.262356	0.0586444	3	3	9289	06-07	92	57
215	day06-07	PDCD1	2.15632	3.37098e-25	0.227444	0.0544444	3	3	5133	06-07	92	57
216	day06-07	CXCL13	2.09163	3.83133e-80	0.591244	0.166956	3	3	10563	06-07	92	57
217	day06-07	IL21	2.04431	3.45384e-09	0.0866222	0.0207778	3	3	59067	06-07	92	57
218	day06-07	GAB2	2.0286	8.47746e-07	0.0620889	0.0149333	3	3	9846	06-07	92	57
219	day06-07	CD47	1.97612	4.16446e-05	0.0462222	0.012	3	3	961	06-07	92	57
220	day06-07	IL26	1.82463	4.33234e-06	0.0733111	0.0249556	3	3	55801	06-07	92	57
221	day06-07	DUSP4	1.7221	3.51784e-13	0.159311	0.0511333	3	3	1846	06-07	92	57
222	day06-07	POU2AF1	1.5768	2.08785e-27	0.332689	0.113511	3	3	5450	06-07	92	57
223	day06-07	ab-TCR-alpha-beta	1.57025	4.52702e-44	0.940022	0.829867	3	3	28755	06-07	92	57
224	day06-07	LYN	1.42602	2.42077e-07	0.103467	0.0380889	3	3	4067	06-07	92	57
225	day06-07	NRP1	1.41871	0.000123682	0.0203111	0.000511111	3	3	8829	06-07	92	57
226	day06-07	CD200	1.34437	2.5921e-18	0.2806	0.110156	3	3	4345	06-07	92	57
227	day06-07	GATA3	1.33178	3.54536e-13	0.207933	0.0821111	3	3	2625	06-07	92	57
228	day06-07	EGR3	1.25851	6.85347e-05	0.0786	0.0329111	3	3	1960	06-07	92	57
229	day06-07	CD59	1.17129	1.25222e-17	0.321511	0.147778	3	3	966	06-07	92	57
230	day06-07	ITGB1	1.11061	1.15082e-12	0.259822	0.123711	3	3	3688	06-07	92	57
231	day06-07	CCR6	1.10682	0.00048689	0.0888222	0.0457111	3	3	1235	06-07	92	57
232	day06-07	TIGIT	1.10451	1.65262e-25	0.456689	0.217267	3	3	201633	06-07	92	57
233	day06-07	ab-CD279	1.10329	3.83532e-165	0.999556	0.984733	3	3	5133	06-07	92	57
234	day06-07	HAVCR2	1.06341	2.21149e-06	0.147467	0.0757556	3	3	84868	06-07	92	57
235	day06-07	RORC	1.04026	4.2487e-06	0.141844	0.0726667	3	3	6097	06-07	92	57
236	day06-07	CXCR5	1.03029	2.32726e-28	0.519511	0.267422	3	3	643	06-07	92	57
237	day06-07	MME	1.01072	0.00180327	0.0139333	0.000333333	3	3	4311	06-07	92	57
238	day06-07	ATF6B	1.00903	1.18249e-09	0.212111	0.101289	3	3	1388	06-07	92	57
239	day06-07	PASK	0.928081	7.05259e-48	0.721978	0.430244	3	3	23178	06-07	92	57
240	day06-07	AIM2	0.896844	7.06361e-07	0.178511	0.0935333	3	3	9447	06-07	92	57
241	day06-07	CPT1A	0.854147	0.000481392	0.1498	0.0796333	2	2	1374	06-07	92	57
242	day06-07	CD58	0.835679	2.15472e-08	0.254733	0.146933	3	3	965	06-07	92	57
243	day06-07	HNRNPLL	0.813066	3.00508e-07	0.217133	0.121711	3	3	92906	06-07	92	57
244	day06-07	KLRB1	0.80805	5.25874e-24	0.5906	0.351644	3	3	3820	06-07	92	57
245	day06-07	ITGA4	0.776594	4.02953e-12	0.383289	0.230222	3	3	3676	06-07	92	57
246	day06-07	IL6R	0.76555	1.17782e-07	0.246222	0.135178	3	3	3570	06-07	92	57
247	day06-07	ab-CD278	0.754598	1.04114e-57	0.996311	0.980633	3	2	29851	06-07	92	57
248	day06-07	CBLB	0.746659	6.32821e-13	0.422489	0.250689	3	3	868	06-07	92	57
249	day06-07	ab-CD161	0.73306	1.32663e-22	0.943022	0.844356	3	3	3820	06-07	92	57
250	day06-07	BCL6	0.726618	3.61831e-10	0.363089	0.214333	3	3	604	06-07	92	57
251	day06-07	CHI3L2	0.726561	3.00737e-07	0.258333	0.153044	3	3	1117	06-07	92	57
252	day06-07	CD4	0.708639	5.26411e-56	0.862911	0.580044	3	3	920	06-07	92	57
253	day06-07	ab-Tim3	0.705022	1.66287e-36	0.988244	0.956422	3	3	84868	06-07	92	57
254	day06-07	BTLA	0.687315	7.35842e-06	0.224333	0.134889	3	3	151888	06-07	92	57
255	day06-07	CD84	0.670212	1.4096e-06	0.267467	0.165844	3	3	8832	06-07	92	57
256	day06-07	TRIB2	0.669723	1.42145e-12	0.480489	0.298422	3	3	28951	06-07	92	57
257	day06-07	CCR5	0.664952	0.000146353	0.2034	0.136244	3	3	1234	06-07	92	57
258	day06-07	IL10	0.6392	1.5988e-15	0.540511	0.379356	3	3	3586	06-07	92	57
259	day06-07	GNLY	0.628976	0.00025228	0.253333	0.184467	3	3	10578	06-07	92	57
260	day06-07	TNFRSF1A	0.619454	5.32837e-06	0.272556	0.175467	3	3	7132	06-07	92	57
261	day06-07	CTLA4	0.609264	1.26157e-09	0.435333	0.278467	3	3	1493	06-07	92	57
262	day06-07	CD8B	0.607135	0.000371278	0.190733	0.125244	3	3	926	06-07	92	57
263	day06-07	SLAMF1	0.573337	1.81302e-05	0.282533	0.192911	3	3	6504	06-07	92	57
264	day06-07	NFATC2	0.572253	3.46538e-06	0.315489	0.206978	3	3	4773	06-07	92	57
265	day06-07	NFATC3	0.565781	2.85002e-05	0.267733	0.1782	3	3	4775	06-07	92	57
266	day06-07	CD27	0.534179	5.65338e-15	0.6984	0.478378	3	3	939	06-07	92	57
267	day06-07	OAS1	0.529195	1.05984e-21	0.803356	0.571978	3	3	4938	06-07	92	57
268	day06-07	IFI6	0.514678	9.36446e-19	0.742089	0.531667	3	3	2537	06-07	92	57
269	day06-07	FAS	0.50072	3.73925e-05	0.290333	0.192622	3	3	355	06-07	92	57
270	day06-07	CD28	0.493724	1.83595e-05	0.326511	0.2222	3	3	940	06-07	92	57
271	day06-07	CD3G	0.475303	1.07082e-10	0.622844	0.447733	3	3	917	06-07	92	57
272	day06-07	BCL11B	0.434263	0.000179154	0.310467	0.215711	3	3	64919	06-07	92	57
273	day06-07	ab-CD19	0.431682	1.15161e-08	0.829133	0.7282	3	3	930	06-07	92	57
274	day06-07	ICOS	0.406862	2.92865e-06	0.523844	0.387178	3	3	29851	06-07	92	57
275	day06-07	STAT1	0.380909	3.56173e-05	0.501089	0.365822	3	3	6772	06-07	92	57
276	day06-07	PDIA6	0.372858	0.000192969	0.436444	0.323711	3	3	10130	06-07	92	57
277	day06-07	BNIP3L	0.367668	3.02284e-05	0.489889	0.385889	3	3	665	06-07	92	57
278	day06-07	TNFRSF1B	0.364124	7.85581e-05	0.500556	0.376578	3	3	7133	06-07	92	57
279	day06-07	ab-CD21	0.360408	5.75611e-09	0.8945	0.8077	2	2	1380	06-07	92	57
280	day06-07	IL2RB	0.353028	1.14185e-10	0.805622	0.633422	3	3	3560	06-07	92	57
281	day06-07	CD46	0.343527	8.20588e-05	0.548467	0.415111	3	3	4179	06-07	92	57
282	day06-07	NFKB1	0.342857	0.000300258	0.456889	0.353778	3	3	4790	06-07	92	57
283	day06-07	ab-CD27	0.335888	1.30287e-36	1	1	3	3	939	06-07	92	57
284	day06-07	LAP3	0.326895	2.58575e-05	0.663822	0.511689	3	3	51056	06-07	92	57
285	day06-07	ab-CD20	0.324349	1.2551e-12	0.983267	0.964644	3	3	931	06-07	92	57
286	day06-07	ab-CD4	0.273785	7.73313e-67	0.999667	0.9994	3	3	920	06-07	92	57
287	day06-07	DDIT4	0.258013	8.91549e-05	0.7262	0.595467	3	3	54541	06-07	92	57
288	day06-07	LAT	0.247825	5.09991e-05	0.748778	0.628333	3	3	27040	06-07	92	57
289	day06-07	CD164	0.24495	1.68618e-06	0.865778	0.728333	3	3	8763	06-07	92	57
290	day06-07	S100A4	0.231876	1.40999e-06	0.811333	0.703689	3	3	6275	06-07	92	57
291	day06-07	CD3D	0.224844	3.04982e-15	0.919044	0.821	3	3	915	06-07	92	57
292	day06-07	FYB	0.219657	0.000969281	0.772622	0.653844	3	3	2533	06-07	92	57
293	day06-07	TRBC2	0.217786	7.88012e-28	0.988422	0.924622	3	3	28638	06-07	92	57
294	day06-07	FYN	0.217147	1.60719e-08	0.929933	0.813778	3	3	2534	06-07	92	57
295	day06-07	MX1	0.216152	1.54166e-15	0.937644	0.841489	3	3	4599	06-07	92	57
296	day06-07	ab-CD38	0.213822	3.42031e-24	1	1	3	3	952	06-07	92	57
297	day06-07	ab-IgD	0.212414	8.47924e-05	0.897022	0.808267	3	3	3495	06-07	92	57
298	day06-07	ab-HLA-DR	0.179025	1.30516e-25	1	1	3	2	3122	06-07	92	57
299	day06-07	ab-CXCR5	0.145529	0.000372191	0.991667	0.983578	3	3	643	06-07	92	57
300	day06-07	LY6E	0.127684	2.48146e-06	0.964133	0.905933	2	2	4061	06-07	92	57
301	day06-07	ab-CD45RO	0.121513	3.58304e-05	0.996711	0.991156	3	3	5788	06-07	92	57
302	day06-07	TRAC	0.114985	1.84096e-16	0.987556	0.959733	3	3	28755	06-07	92	57
303	day06-07	LCK	0.113439	1.15901e-10	0.966689	0.924244	3	3	3932	06-07	92	57
304	day06-07	ab-CD3	0.0607611	1.36569e-06	1	0.9994	3	3	916	06-07	92	57
305	day07-08	ADGRG1	2.25584	8.73453e-28	0.247733	0.0612222	3	3	9289	07-08	73	43
306	day07-08	PDCD1	2.05382	5.43322e-22	0.213067	0.0556889	3	3	5133	07-08	73	43
307	day07-08	CXCL13	2.04605	2.08334e-76	0.581867	0.168978	3	3	10563	07-08	73	43
308	day07-08	IL21	2.01716	2.01596e-08	0.0808889	0.0200444	3	3	59067	07-08	73	43
309	day07-08	POU2AF1	1.66143	9.25251e-29	0.332622	0.111822	3	3	5450	07-08	73	43
310	day07-08	IL26	1.52757	0.000224698	0.0662444	0.0279556	3	3	55801	07-08	73	43
311	day07-08	LYN	1.49242	2.11663e-06	0.0938889	0.0368889	3	3	4067	07-08	73	43
312	day07-08	ab-TCR-alpha-beta	1.46501	4.72795e-39	0.940022	0.846044	3	3	28755	07-08	73	43
313	day07-08	ASCL2	1.4619	0.000188063	0.0194444	0.000533333	3	3	430	07-08	73	43
314	day07-08	EGR3	1.36895	2.42925e-05	0.0779111	0.0299556	3	3	1960	07-08	73	43
315	day07-08	DUSP4	1.35636	1.97576e-08	0.147533	0.0649556	3	3	1846	07-08	73	43
316	day07-08	CD200	1.34624	5.15786e-17	0.269089	0.109578	3	3	4345	07-08	73	43
317	day07-08	MME	1.08226	0.000516857	0.0167333	0.000333333	3	3	4311	07-08	73	43
318	day07-08	ab-CD279	1.08145	1.12671e-164	0.999556	0.987778	3	3	5133	07-08	73	43
319	day07-08	CXCR5	1.05457	1.22482e-27	0.501111	0.2524	3	3	643	07-08	73	43
320	day07-08	GATA3	1.0056	4.95771e-08	0.193867	0.1002	3	3	2625	07-08	73	43
321	day07-08	TIGIT	0.973022	1.16759e-19	0.430333	0.2258	3	3	201633	07-08	73	43
322	day07-08	PASK	0.94095	1.16156e-46	0.702778	0.424533	3	3	23178	07-08	73	43
323	day07-08	HAVCR2	0.938345	3.40405e-05	0.144667	0.0815556	3	3	84868	07-08	73	43
324	day07-08	ATF6B	0.903233	4.0424e-07	0.195022	0.106822	3	3	1388	07-08	73	43
325	day07-08	ITGB1	0.89205	2.99212e-08	0.243689	0.1406	3	3	3688	07-08	73	43
326	day07-08	RORC	0.891216	5.70345e-05	0.148222	0.0863333	3	3	6097	07-08	73	43
327	day07-08	CHI3L2	0.880376	4.7515e-09	0.254533	0.140933	3	3	1117	07-08	73	43
328	day07-08	CD59	0.856633	8.10187e-11	0.312444	0.180689	3	3	966	07-08	73	43
329	day07-08	CPT1A	0.854147	0.000484082	0.1498	0.0796333	2	2	1374	07-08	73	43
330	day07-08	BCL6	0.790179	3.71237e-11	0.353022	0.204467	3	3	604	07-08	73	43
331	day07-08	CBLB	0.786679	1.83529e-13	0.410533	0.2432	3	3	868	07-08	73	43
332	day07-08	CD84	0.705583	8.60967e-07	0.265822	0.167756	3	3	8832	07-08	73	43
333	day07-08	ab-CD278	0.695353	1.20004e-51	0.996311	0.980633	3	2	29851	07-08	73	43
334	day07-08	CD4	0.692576	3.50935e-53	0.854511	0.579422	3	3	920	07-08	73	43
335	day07-08	IL6R	0.685638	2.79083e-06	0.237756	0.1416	3	3	3570	07-08	73	43
336	day07-08	BTLA	0.684033	2.12179e-05	0.209844	0.128089	3	3	151888	07-08	73	43
337	day07-08	ITGA4	0.669215	1.31579e-09	0.381667	0.2534	3	3	3676	07-08	73	43
338	day07-08	TRIB2	0.653991	3.89605e-11	0.448089	0.286	3	3	28951	07-08	73	43
339	day07-08	CD58	0.639535	1.9081e-05	0.252778	0.172267	3	3	965	07-08	73	43
340	day07-08	KLRB1	0.634742	1.9117e-16	0.579467	0.395156	3	3	3820	07-08	73	43
341	day07-08	IL10	0.63393	7.28259e-16	0.543067	0.400733	3	3	3586	07-08	73	43
342	day07-08	HNRNPLL	0.606277	0.000375848	0.196178	0.132244	3	3	92906	07-08	73	43
343	day07-08	TNFRSF1A	0.575158	2.16473e-05	0.2772	0.188911	3	3	7132	07-08	73	43
344	day07-08	CD27	0.571239	2.14563e-17	0.681422	0.4658	3	3	939	07-08	73	43
345	day07-08	ab-CD161	0.569267	6.01195e-15	0.942844	0.862533	3	3	3820	07-08	73	43
346	day07-08	ab-Tim3	0.531282	2.29338e-23	0.988111	0.963556	3	3	84868	07-08	73	43
347	day07-08	CTLA4	0.506693	4.05528e-07	0.424044	0.301444	3	3	1493	07-08	73	43
348	day07-08	SLAMF1	0.473111	0.000536288	0.284467	0.214222	3	3	6504	07-08	73	43
349	day07-08	OAS1	0.458755	3.34153e-17	0.783178	0.586333	3	3	4938	07-08	73	43
350	day07-08	CD28	0.45268	0.000157854	0.318822	0.231867	3	3	940	07-08	73	43
351	day07-08	IFI6	0.413577	1.64391e-13	0.718978	0.5588	3	3	2537	07-08	73	43
352	day07-08	CD3G	0.38358	4.74512e-08	0.594733	0.467133	3	3	917	07-08	73	43
353	day07-08	BNIP3L	0.366551	4.17942e-05	0.469689	0.385356	3	3	665	07-08	73	43
354	day07-08	ab-CD27	0.36346	1.03955e-40	1	1	3	3	939	07-08	73	43
355	day07-08	ab-CD21	0.360408	5.96502e-09	0.8945	0.8077	2	2	1380	07-08	73	43
356	day07-08	TCF7	0.349018	5.11584e-05	0.532667	0.412244	3	3	6932	07-08	73	43
357	day07-08	ab-CD19	0.338296	2.56171e-05	0.826156	0.737822	3	3	930	07-08	73	43
358	day07-08	ITK	0.323297	6.89334e-06	0.616444	0.501022	3	3	3702	07-08	73	43
359	day07-08	ab-CD4	0.284073	1.57281e-55	0.999667	0.9994	3	3	920	07-08	73	43
360	day07-08	IL2RB	0.263148	4.47312e-07	0.786956	0.6628	3	3	3560	07-08	73	43
361	day07-08	ab-CD20	0.23393	5.13844e-08	0.983267	0.969289	3	3	931	07-08	73	43
362	day07-08	FYB	0.232529	2.7863e-05	0.761	0.657067	3	3	2533	07-08	73	43
363	day07-08	ab-IgD	0.2265	1.77104e-05	0.897022	0.808533	3	3	3495	07-08	73	43
364	day07-08	TRBC2	0.224745	1.9053e-26	0.9884	0.920889	3	3	28638	07-08	73	43
365	day07-08	CD3D	0.224028	3.15806e-13	0.919311	0.818644	3	3	915	07-08	73	43
366	day07-08	LAT	0.219398	2.90851e-05	0.744333	0.6526	3	3	27040	07-08	73	43
367	day07-08	ab-CXCR5	0.212699	3.59759e-06	0.991667	0.981978	3	3	643	07-08	73	43
368	day07-08	MX1	0.201509	4.52976e-15	0.932022	0.848222	3	3	4599	07-08	73	43
369	day07-08	FYN	0.196856	6.88031e-09	0.917867	0.821622	3	3	2534	07-08	73	43
370	day07-08	CD164	0.18793	5.59318e-05	0.844044	0.744844	3	3	8763	07-08	73	43
371	day07-08	ab-CD38	0.181461	1.18745e-15	1	1	3	3	952	07-08	73	43
372	day07-08	PTPRC	0.172444	2.37186e-06	0.8964	0.809667	3	3	5788	07-08	73	43
373	day07-08	ab-HLA-DR	0.166367	2.07746e-24	1	1	3	2	3122	07-08	73	43
374	day07-08	LY6E	0.127684	2.54866e-06	0.964133	0.905933	2	2	4061	07-08	73	43
375	day07-08	ab-CD28	0.123545	7.53867e-07	0.998822	1	3	3	940	07-08	73	43
376	day07-08	TRAC	0.114312	6.74951e-16	0.987444	0.9602	3	3	28755	07-08	73	43
377	day07-08	LCK	0.113233	2.23116e-10	0.961444	0.920756	3	3	3932	07-08	73	43
378	day10	ASCL2	1.98016	4.2608e-05	0.0229778	0.000666667	3	3	430	10	66	26
379	day10	NRP1	1.90809	0.00101396	0.0160444	0.000733333	3	3	8829	10	66	26
380	day10	ADGRG1	1.53713	4.21115e-18	0.256	0.101111	3	3	9289	10	66	26
381	day10	CXCL13	1.47746	3.08618e-48	0.552467	0.224022	3	3	10563	10	66	26
382	day10	PDCD1	1.41779	1.72942e-09	0.148778	0.0607111	3	3	5133	10	66	26
383	day10	POU2AF1	1.22686	1.44592e-17	0.309	0.1448	3	3	5450	10	66	26
384	day10	ab-TCR-alpha-beta	1.21856	8.73659e-45	0.965733	0.895756	3	3	28755	10	66	26
385	day10	GATA3	1.18716	8.64378e-09	0.176333	0.0840667	3	3	2625	10	66	26
386	day10	CD200	1.12218	3.67613e-10	0.224311	0.114911	3	3	4345	10	66	26
387	day10	CXCR5	1.01422	1.58184e-25	0.482267	0.265889	3	3	643	10	66	26
388	day10	ab-CD279	0.948534	7.43172e-149	0.999733	0.993111	3	3	5133	10	66	26
389	day10	DUSP4	0.936867	2.91587e-05	0.151022	0.0872667	3	3	1846	10	66	26
390	day10	BCL6	0.906043	4.26236e-11	0.302044	0.172044	3	3	604	10	66	26
391	day10	IL10	0.807309	4.9909e-19	0.4822	0.339533	3	3	3586	10	66	26
392	day10	PASK	0.801096	8.19753e-37	0.6764	0.460733	3	3	23178	10	66	26
393	day10	CD84	0.788896	2.8206e-07	0.251844	0.158933	3	3	8832	10	66	26
394	day10	TRIB2	0.788393	2.05623e-11	0.366956	0.227489	3	3	28951	10	66	26
395	day10	VEGFA	0.746482	1.74328e-06	0.254822	0.1678	3	3	7422	10	66	26
396	day10	CHI3L2	0.730631	2.94029e-05	0.211511	0.139089	3	3	1117	10	66	26
397	day10	ITGB1	0.716267	0.00013593	0.206911	0.143667	3	3	3688	10	66	26
398	day10	IL6R	0.664167	7.3424e-06	0.248956	0.165356	3	3	3570	10	66	26
399	day10	CD59	0.634909	9.13242e-06	0.273933	0.192311	3	3	966	10	66	26
400	day10	CBLB	0.607166	8.99467e-09	0.390267	0.271378	3	3	868	10	66	26
401	day10	ab-CD278	0.589469	4.13516e-38	0.995089	0.979967	3	2	29851	10	66	26
402	day10	TIGIT	0.561815	1.29393e-07	0.385267	0.280978	3	3	201633	10	66	26
403	day10	BNIP3L	0.537029	1.10218e-10	0.480622	0.372911	3	3	665	10	66	26
404	day10	ab-Tim3	0.493596	1.53586e-21	0.987356	0.969267	3	3	84868	10	66	26
405	day10	CD4	0.490496	7.50268e-43	0.882089	0.688667	3	3	920	10	66	26
406	day10	CTLA4	0.460283	2.30866e-05	0.378911	0.287978	3	3	1493	10	66	26
407	day10	KLRB1	0.455333	9.80878e-12	0.623956	0.484622	3	3	3820	10	66	26
408	day10	DDIT4	0.431656	1.70147e-13	0.684133	0.536756	3	3	54541	10	66	26
409	day10	CD46	0.37718	2.83168e-06	0.4866	0.395622	3	3	4179	10	66	26
410	day10	CD27	0.369284	4.89894e-10	0.653489	0.531044	3	3	939	10	66	26
411	day10	ab-CD27	0.353723	2.48489e-35	1	1	3	3	939	10	66	26
412	day10	ab-CD161	0.344192	1.82795e-11	0.989467	0.954867	3	3	3820	10	66	26
413	day10	ab-CD19	0.329079	6.01165e-06	0.821156	0.748822	3	3	930	10	66	26
414	day10	SLC2A3	0.318987	0.000112112	0.473778	0.416111	3	3	6515	10	66	26
415	day10	ITK	0.312404	4.33731e-06	0.561778	0.480778	3	3	3702	10	66	26
416	day10	TCF7	0.303189	0.000215088	0.489244	0.405311	3	3	6932	10	66	26
417	day10	ab-CD21	0.293079	7.43228e-07	0.885967	0.804467	2	2	1380	10	66	26
418	day10	ab-CXCR5	0.284876	3.33909e-08	0.994	0.985178	3	3	643	10	66	26
419	day10	ALDOC	0.28458	1.71963e-05	0.553889	0.500378	3	3	230	10	66	26
420	day10	CD3G	0.274917	1.6113e-05	0.556778	0.489511	3	3	917	10	66	26
421	day10	ab-CD4	0.271099	8.94811e-37	0.9998	0.999822	3	3	920	10	66	26
422	day10	PIK3IP1	0.269305	1.99921e-07	0.757444	0.643244	3	3	113791	10	66	26
423	day10	CXCR4	0.258227	0.00021299	0.540356	0.475533	3	3	7852	10	66	26
424	day10	FYB	0.23956	7.76378e-08	0.704267	0.639867	3	3	2533	10	66	26
425	day10	OAS1	0.235341	5.34384e-11	0.790222	0.718489	3	3	4938	10	66	26
426	day10	FYN	0.233327	3.31851e-23	0.912289	0.840156	3	3	2534	10	66	26
427	day10	ab-CD69	0.216355	8.28183e-09	1	1	2	2	969	10	66	26
428	day10	PTPRC	0.184246	1.77836e-07	0.786711	0.730511	3	3	5788	10	66	26
429	day10	ab-CD20	0.179784	5.03859e-06	0.988222	0.979978	3	3	931	10	66	26
430	day10	CD5	0.17402	1.7505e-05	0.772467	0.709867	3	3	921	10	66	26
431	day10	TRBC2	0.161081	1.10172e-21	0.985733	0.954111	3	3	28638	10	66	26
432	day10	IFI6	0.160869	0.000148571	0.652556	0.625	3	3	2537	10	66	26
433	day10	BTG1	0.158765	5.79691e-05	0.784911	0.736533	3	3	694	10	66	26
434	day10	ab-CD28	0.138587	5.62017e-08	0.998667	0.999622	3	3	940	10	66	26
435	day10	CD164	0.135978	1.65716e-06	0.802489	0.768622	3	3	8763	10	66	26
436	day10	LCK	0.134408	4.78673e-23	0.968244	0.940289	3	3	3932	10	66	26
437	day10	CD3D	0.133881	2.61694e-08	0.910356	0.868844	3	3	915	10	66	26
438	day10	ab-HLA-DR	0.129261	1.57667e-14	1	1	3	2	3122	10	66	26
439	day10	TPI1	0.126373	4.23848e-06	0.922756	0.881089	3	3	7167	10	66	26
440	day10	ab-CD38	0.112159	3.4761e-06	1	1	3	3	952	10	66	26
441	day10	TRAC	0.099224	8.60792e-15	0.986511	0.964889	3	3	28755	10	66	26
442	day10	ENO1	0.0839787	0.00093519	0.940356	0.924244	3	3	2023	10	66	26
443	day10	MX1	0.0497323	1.68531e-05	0.945267	0.941489	3	3	4599	10	66	26
444	day12-14	IL21	2.12613	1.41349e-05	0.056	0.0163111	3	3	59067	12-14	47	20
445	day12-14	PDCD1	1.3534	3.42507e-10	0.178089	0.0800889	3	3	5133	12-14	47	20
446	day12-14	ADGRG1	1.24022	3.05409e-12	0.2524	0.131667	3	3	9289	12-14	47	20
447	day12-14	CXCL13	1.16799	1.81632e-29	0.492711	0.2434	3	3	10563	12-14	47	20
448	day12-14	ab-TCR-alpha-beta	1.15596	7.11582e-09	0.879622	0.865667	3	3	28755	12-14	47	20
449	day12-14	GATA3	1.08554	6.60664e-07	0.183111	0.107311	3	3	2625	12-14	47	20
450	day12-14	CXCR5	1.08148	3.2035e-20	0.395689	0.220022	3	3	643	12-14	47	20
451	day12-14	CD200	0.95704	6.96167e-07	0.207978	0.127	3	3	4345	12-14	47	20
452	day12-14	DUSP4	0.882526	4.56811e-05	0.1826	0.1204	3	3	1846	12-14	47	20
453	day12-14	POU2AF1	0.85041	1.7246e-09	0.299111	0.195156	3	3	5450	12-14	47	20
454	day12-14	ab-CD279	0.772393	2.67619e-116	1	0.991044	3	3	5133	12-14	47	20
455	day12-14	IL10	0.749159	1.42091e-12	0.421022	0.343267	3	3	3586	12-14	47	20
456	day12-14	BCL6	0.744663	1.05232e-05	0.233178	0.160644	3	3	604	12-14	47	20
457	day12-14	TRIB2	0.681313	5.11206e-08	0.327	0.229	3	3	28951	12-14	47	20
458	day12-14	PASK	0.627692	3.40248e-25	0.637511	0.499733	3	3	23178	12-14	47	20
459	day12-14	TIGIT	0.558059	6.41429e-09	0.414689	0.316911	3	3	201633	12-14	47	20
460	day12-14	ab-CD27	0.555625	1.05139e-58	1	0.999578	3	3	939	12-14	47	20
461	day12-14	ab-CD278	0.511074	2.07029e-30	0.996289	0.9744	3	2	29851	12-14	47	20
462	day12-14	NFATC2	0.509827	0.00013947	0.293156	0.235667	3	3	4773	12-14	47	20
463	day12-14	ab-Tim3	0.500393	1.07766e-25	0.987533	0.9724	3	3	84868	12-14	47	20
464	day12-14	CD27	0.484344	9.86053e-17	0.644178	0.502756	3	3	939	12-14	47	20
465	day12-14	CD4	0.43181	3.62225e-59	0.904178	0.7708	3	3	920	12-14	47	20
466	day12-14	ITK	0.414007	1.47205e-09	0.523267	0.453933	3	3	3702	12-14	47	20
467	day12-14	ab-CXCR5	0.397064	4.05745e-08	0.969578	0.971867	3	3	643	12-14	47	20
468	day12-14	KLRB1	0.365975	1.39261e-10	0.663489	0.5584	3	3	3820	12-14	47	20
469	day12-14	ab-CD161	0.362304	2.64013e-12	0.984556	0.958533	3	3	3820	12-14	47	20
470	day12-14	TCF7	0.347071	6.15632e-05	0.433867	0.371178	3	3	6932	12-14	47	20
471	day12-14	DDIT4	0.30649	3.24005e-06	0.5538	0.483511	3	3	54541	12-14	47	20
472	day12-14	ab-CD20	0.288695	3.58352e-06	0.976622	0.979111	3	3	931	12-14	47	20
473	day12-14	FYN	0.280388	4.48067e-36	0.895333	0.8304	3	3	2534	12-14	47	20
474	day12-14	PTPRC	0.221667	1.674e-10	0.754422	0.708489	3	3	5788	12-14	47	20
475	day12-14	ab-CD69	0.219923	1.03625e-08	1	1	2	2	969	12-14	47	20
476	day12-14	TRBC2	0.204355	1.11455e-31	0.978689	0.957533	3	3	28638	12-14	47	20
477	day12-14	PIK3IP1	0.201061	9.23888e-07	0.736111	0.6788	3	3	113791	12-14	47	20
478	day12-14	OAS1	0.195025	6.80026e-09	0.803244	0.746133	3	3	4938	12-14	47	20
479	day12-14	CD3G	0.182795	6.37259e-06	0.636578	0.616111	3	3	917	12-14	47	20
480	day12-14	ab-CD4	0.178165	2.80539e-21	1	1	3	3	920	12-14	47	20
481	day12-14	LCK	0.17364	4.01697e-38	0.967156	0.941667	3	3	3932	12-14	47	20
482	day12-14	CD3D	0.143137	6.85552e-17	0.925733	0.910156	3	3	915	12-14	47	20
483	day12-14	CD164	0.129801	6.95844e-08	0.783733	0.773	3	3	8763	12-14	47	20
484	day12-14	TRAC	0.127897	3.36218e-35	0.992267	0.982111	3	3	28755	12-14	47	20
485	day12-14	ab-CD28	0.103323	5.50706e-05	0.999244	1	3	3	940	12-14	47	20
486	day12-14	ASCL2	0.0715119	0.000456448	0.0157556	0	3	3	430	12-14	47	20
487	day12-14	CD6	0.0518743	1.12806e-05	0.874044	0.893	3	3	923	12-14	47	20
488	day12-14	MX1	0.0466129	1.04816e-05	0.946333	0.946244	3	3	4599	12-14	47	20
489	day12-14	ab-HLA-DR	0.0448534	7.80136e-05	1	1	3	2	3122	12-14	47	20
490	day12-14	HLA-A	0.0209582	4.40455e-07	1	1	3	3	3105	12-14	47	20

## Sheet: Tcell adult upregulation
	day_group	marker	log2FC_mean	pval_adj_mean	pct1_mean	pct2_mean	n1	n2	ENTREZID	days	n_significant	n_distinct
1	day0	IGHA1-secreted	-5.37862	4.27984e-24	0.00433333	0.1242	3	3	3493	0	81	58
2	day0	DPP4	-2.4968	9.08626e-11	0.0161111	0.086	3	3	1803	0	81	58
3	day0	ab-CD89	-2.49404	1.113e-13	0.597511	0.646467	3	3	2204	0	81	58
4	day0	LGALS1	-2.3961	7.24725e-14	0.0246889	0.117933	3	3	3956	0	81	58
5	day0	PRDM1	-2.15258	2.21089e-25	0.0566889	0.228822	3	3	639	0	81	58
6	day0	IL15RA	-2.14516	7.11059e-05	0.0110222	0.0431333	3	3	3601	0	81	58
7	day0	ENTPD1	-2.09055	6.85265e-08	0.0191556	0.0755111	3	3	953	0	81	58
8	day0	IL17F	-2.04951	6.52659e-06	0.0120222	0.0515333	3	3	112744	0	81	58
9	day0	IFIT3	-1.97476	0.000436662	0.0121556	0.0404222	3	3	3437	0	81	58
10	day0	IL1R2	-1.93418	2.7734e-05	0.0142444	0.0516	3	3	7850	0	81	58
11	day0	CASP1	-1.84414	2.1426e-07	0.0357667	0.118633	2	2	834	0	81	58
12	day0	IGHG3-secreted	-1.8034	0.000122131	0.0167111	0.0511111	3	3	3502	0	81	58
13	day0	FTH1	-1.7743	1.43097e-05	0.0219778	0.0654	3	3	2495	0	81	58
14	day0	CCR7	-1.73553	4.60245e-46	0.147289	0.443111	3	3	1236	0	81	58
15	day0	IL7R	-1.73017	1.78776e-100	0.247222	0.724711	3	3	3575	0	81	58
16	day0	IFITM3	-1.69869	1.69415e-50	0.164311	0.475378	3	3	10410	0	81	58
17	day0	HLA-DQB1	-1.68596	1.63259e-05	0.024	0.0684889	3	3	3119	0	81	58
18	day0	IGHG2-secreted	-1.67123	1.12138e-12	0.0619778	0.167378	3	3	3501	0	81	58
19	day0	FOXP3	-1.60393	2.93296e-10	0.0448889	0.131933	3	3	50943	0	81	58
20	day0	ab-CD127	-1.51741	3.71975e-40	0.696233	0.867267	2	2	3575	0	81	58
21	day0	CD79B	-1.4852	6.56993e-16	0.0839556	0.222044	3	3	974	0	81	58
22	day0	CCL20	-1.46018	2.46766e-07	0.0389333	0.104289	3	3	6364	0	81	58
23	day0	TNFSF13B	-1.38405	0.000382078	0.0239778	0.0592889	3	3	10673	0	81	58
24	day0	CTSW	-1.35645	2.50493e-06	0.0383333	0.0966667	3	3	1521	0	81	58
25	day0	IGLC3	-1.338	5.77198e-18	0.147378	0.295511	3	3	3539	0	81	58
26	day0	IL2RA	-1.30284	5.03885e-05	0.0347778	0.0811778	3	3	3559	0	81	58
27	day0	IGHG1-secreted	-1.26401	1.11105e-07	0.0777556	0.154333	3	3	3500	0	81	58
28	day0	CCR6	-1.26343	1.98245e-05	0.0338	0.0845778	3	3	1235	0	81	58
29	day0	JCHAIN	-1.25893	4.29882e-08	0.0715778	0.152867	3	3	3512	0	81	58
30	day0	PTGER4	-1.24653	4.00769e-14	0.153067	0.336733	2	2	5734	0	81	58
31	day0	ab-CD73	-1.23238	5.94849e-37	0.763633	0.881467	2	2	4907	0	81	58
32	day0	IL18R1	-1.18338	0.000242677	0.0381556	0.0807778	3	3	8809	0	81	58
33	day0	IL12RB1	-1.1	2.95312e-06	0.0638889	0.131511	3	3	3594	0	81	58
34	day0	IGHM-secreted	-1.06384	1.00548e-11	0.160133	0.273267	3	3	3507	0	81	58
35	day0	IGKC	-1.03316	2.9401e-14	0.211356	0.329622	3	3	3514	0	81	58
36	day0	S100A10	-1.0127	1.28188e-29	0.274822	0.512044	3	3	6281	0	81	58
37	day0	ab-CCR7	-0.964724	3.09392e-53	0.949778	0.985644	3	3	1236	0	81	58
38	day0	ITGB7	-0.955861	2.31591e-05	0.0755778	0.1386	3	3	3695	0	81	58
39	day0	MYC	-0.951685	1.66865e-07	0.109711	0.197956	3	3	4609	0	81	58
40	day0	C10orf54	-0.950739	3.39322e-21	0.240756	0.439933	3	3	64115	0	81	58
41	day0	SELPLG	-0.930851	1.07591e-24	0.2758	0.494356	3	3	6404	0	81	58
42	day0	RUNX3	-0.910057	1.54659e-11	0.161444	0.300044	3	3	864	0	81	58
43	day0	IL23R	-0.883348	2.20049e-17	0.258889	0.405756	3	3	149233	0	81	58
44	day0	SELL	-0.876585	5.76526e-26	0.3144	0.553333	3	3	6402	0	81	58
45	day0	STING1	-0.864031	1.07352e-05	0.137767	0.235367	2	2	340061	0	81	58
46	day0	DDIT4	-0.848443	1.79383e-24	0.308356	0.5116	3	3	54541	0	81	58
47	day0	RGS1	-0.80518	4.90655e-18	0.302022	0.469333	3	3	5996	0	81	58
48	day0	CST7	-0.778703	2.63213e-06	0.132067	0.217689	3	3	8530	0	81	58
49	day0	IL32	-0.759193	1.67839e-60	0.575	0.9258	3	3	9235	0	81	58
50	day0	BIRC3	-0.752361	1.16585e-05	0.126156	0.2028	3	3	330	0	81	58
51	day0	LY6E	-0.744933	8.23111e-16	0.367667	0.5771	2	2	4061	0	81	58
52	day0	ab-CD8	-0.697376	1.50781e-20	0.953978	0.9816	3	3	925	0	81	58
53	day0	ARL4C	-0.652114	1.46348e-07	0.206956	0.309422	3	3	10123	0	81	58
54	day0	GIMAP5	-0.589502	4.96614e-10	0.298622	0.4342	3	3	55340	0	81	58
55	day0	CXCR4	-0.587388	5.81053e-38	0.5784	0.785444	3	3	7852	0	81	58
56	day0	ab-CD39	-0.568867	1.58366e-15	0.996844	0.995133	3	3	953	0	81	58
57	day0	CD37	-0.544918	2.24607e-23	0.546667	0.773867	3	3	951	0	81	58
58	day0	LEF1	-0.537064	3.20903e-07	0.2686	0.374289	3	3	51176	0	81	58
59	day0	ab-CD25	-0.458345	1.53647e-15	0.952444	0.972111	3	3	3559	0	81	58
60	day0	IFITM2	-0.419441	6.92989e-14	0.514356	0.652311	3	3	10581	0	81	58
61	day0	ab-CD45RA	-0.417568	4.06392e-06	0.973978	0.9822	3	3	5788	0	81	58
62	day0	BTG1	-0.417031	4.67817e-66	0.801156	0.934689	3	3	694	0	81	58
63	day0	CD48	-0.391609	2.65456e-31	0.696978	0.828133	3	3	962	0	81	58
64	day0	PIK3IP1	-0.390953	6.87469e-25	0.659422	0.798844	3	3	113791	0	81	58
65	day0	ab-CD161	-0.388104	0.000145587	0.894067	0.845844	3	3	3820	0	81	58
66	day0	GPI	-0.318464	5.68506e-05	0.390444	0.471533	3	3	2821	0	81	58
67	day0	ITGAL	-0.283667	6.28759e-05	0.476489	0.573467	3	3	3683	0	81	58
68	day0	ab-CD62L	-0.28359	7.30419e-06	0.944444	0.9594	3	3	6402	0	81	58
69	day0	ab-CD83	-0.271855	1.51172e-05	0.894956	0.878089	3	3	9308	0	81	58
70	day0	JUNB	-0.268737	3.27805e-05	0.549156	0.651133	3	3	3726	0	81	58
71	day0	GNAI2	-0.231219	0.000476626	0.450333	0.508289	3	3	2771	0	81	58
72	day0	ab-CD56	-0.219698	9.76676e-08	0.783622	0.930844	3	3	4684	0	81	58
73	day0	CD44	-0.210303	4.40035e-05	0.538733	0.597778	3	3	960	0	81	58
74	day0	ab-CD23	-0.208483	0.000740861	0.950467	0.937933	2	2	2208	0	81	58
75	day0	SPOCK2	-0.17016	3.81773e-06	0.6414	0.690556	3	3	9806	0	81	58
76	day0	S100A4	-0.156221	1.97829e-06	0.658511	0.679156	3	3	6275	0	81	58
77	day0	CD3E	-0.121527	4.97699e-27	0.952622	0.976089	3	3	916	0	81	58
78	day0	ab-CD45	-0.0981084	3.8134e-33	1	1	2	2	5788	0	81	58
79	day0	ab-CD3	-0.0780244	3.37214e-11	0.999756	1	3	3	916	0	81	58
80	day0	CD6	-0.0608991	0.000679033	0.777333	0.779378	3	3	923	0	81	58
81	day0	IGHG4-secreted	0	3.17482e-12	0	0.0569333	3	3	3503	0	81	58
82	day04	IGHA1-secreted	-3.72139	6.04318e-21	0.0133556	0.129578	3	3	3493	04	59	43
83	day04	ab-CD89	-2.65187	6.71088e-09	0.597844	0.605711	3	3	2204	04	59	43
84	day04	ADGRE1	-2.3199	1.21606e-05	0.0106667	0.0461333	3	3	2015	04	59	43
85	day04	IGHG3-secreted	-2.12685	0.000250238	0.0208889	0.0542222	3	3	3502	04	59	43
86	day04	JUN	-1.65528	7.74692e-11	0.0568889	0.150089	3	3	3725	04	59	43
87	day04	IGHG2-secreted	-1.57395	1.34145e-07	0.0927778	0.165911	3	3	3501	04	59	43
88	day04	IGLC3	-1.55969	4.92505e-18	0.166844	0.303244	3	3	3539	04	59	43
89	day04	CCR7	-1.55832	4.19709e-87	0.3024	0.695044	3	3	1236	04	59	43
90	day04	ab-CD127	-1.55118	3.02204e-28	0.6741	0.824833	2	2	3575	04	59	43
91	day04	ab-CCR7	-1.45931	1.72035e-80	0.914511	0.9738	3	3	1236	04	59	43
92	day04	IL7R	-1.39067	5.86463e-75	0.329533	0.696644	3	3	3575	04	59	43
93	day04	ab-CD56	-1.3635	1.45071e-16	0.457756	0.567444	3	3	4684	04	59	43
94	day04	JCHAIN	-1.28354	0.000124179	0.0742	0.123733	3	3	3512	04	59	43
95	day04	IGKC	-1.27773	4.08211e-14	0.218	0.325444	3	3	3514	04	59	43
96	day04	KLRK1	-1.25257	2.821e-07	0.0557111	0.1266	3	3	22914	04	59	43
97	day04	CD79B	-1.25115	2.12899e-13	0.118578	0.247489	3	3	974	04	59	43
98	day04	CASP1	-1.22543	1.03348e-06	0.0941	0.1903	2	2	834	04	59	43
99	day04	LGALS1	-1.20167	2.91765e-15	0.153844	0.298644	3	3	3956	04	59	43
100	day04	FOXP3	-1.14255	0.000768951	0.0345778	0.0719333	3	3	50943	04	59	43
101	day04	IFIT3	-1.08754	2.25247e-72	0.441622	0.747867	3	3	3437	04	59	43
102	day04	SELL	-1.07651	1.19011e-50	0.387533	0.654733	3	3	6402	04	59	43
103	day04	IFITM3	-0.992008	4.55026e-56	0.427756	0.7176	3	3	10410	04	59	43
104	day04	S100A10	-0.955129	2.91738e-43	0.390356	0.667733	3	3	6281	04	59	43
105	day04	TNFSF13B	-0.907754	0.000124598	0.0994	0.156289	3	3	10673	04	59	43
106	day04	GIMAP5	-0.881579	3.93569e-56	0.487133	0.754267	3	3	55340	04	59	43
107	day04	DPP4	-0.8726	0.000323545	0.0662889	0.116667	3	3	1803	04	59	43
108	day04	MYC	-0.838216	1.28728e-17	0.297067	0.457289	3	3	4609	04	59	43
109	day04	ab-CD73	-0.838009	1.09796e-09	0.7238	0.7763	2	2	4907	04	59	43
110	day04	LAMP3	-0.814196	1.16916e-09	0.2208	0.320733	3	3	27074	04	59	43
111	day04	DUSP1	-0.769851	1.16376e-05	0.177511	0.242556	3	3	1843	04	59	43
112	day04	SELPLG	-0.768001	1.15967e-24	0.382111	0.579378	3	3	6404	04	59	43
113	day04	IL23R	-0.747302	1.35078e-21	0.433267	0.540178	3	3	149233	04	59	43
114	day04	TNFSF10	-0.7296	2.27998e-22	0.394933	0.538444	3	3	8743	04	59	43
115	day04	IGHM-secreted	-0.701843	6.39635e-06	0.239378	0.299933	3	3	3507	04	59	43
116	day04	ab-CD62L	-0.679502	8.33932e-67	1	1	3	3	6402	04	59	43
117	day04	STING1	-0.668151	7.09734e-07	0.280267	0.3852	2	2	340061	04	59	43
118	day04	ab-CD8	-0.657325	5.29199e-09	0.971733	0.963133	3	3	925	04	59	43
119	day04	LEF1	-0.65144	5.67602e-17	0.408667	0.526044	3	3	51176	04	59	43
120	day04	CST7	-0.633806	0.000197937	0.163622	0.228489	3	3	8530	04	59	43
121	day04	IL32	-0.620677	1.11425e-36	0.650289	0.968867	3	3	9235	04	59	43
122	day04	CD37	-0.60269	2.54742e-40	0.593689	0.841378	3	3	951	04	59	43
123	day04	GPI	-0.572161	6.29663e-23	0.470733	0.605622	3	3	2821	04	59	43
124	day04	ab-CD45RA	-0.544677	5.05266e-07	0.971	0.971689	3	3	5788	04	59	43
125	day04	STAT5A	-0.426732	2.70577e-07	0.389467	0.444711	3	3	6776	04	59	43
126	day04	JUNB	-0.424467	3.88431e-08	0.406422	0.497533	3	3	3726	04	59	43
127	day04	ISG15	-0.397489	1.45546e-14	0.712956	0.916844	3	3	9636	04	59	43
128	day04	STAT3	-0.396236	2.54739e-07	0.413578	0.4646	3	3	6774	04	59	43
129	day04	IRF1	-0.381143	5.07588e-08	0.515167	0.587433	2	2	3659	04	59	43
130	day04	PIK3IP1	-0.35489	7.96593e-20	0.675422	0.745867	3	3	113791	04	59	43
131	day04	LGALS9	-0.291391	1.14457e-06	0.505444	0.596644	3	3	3965	04	59	43
132	day04	ab-CD39	-0.27241	1.34741e-15	0.990111	0.993667	3	3	953	04	59	43
133	day04	ab-CD16	-0.245994	1.29306e-05	0.915733	0.9201	2	2	2214	04	59	43
134	day04	GNAI2	-0.232071	4.1764e-05	0.518933	0.558133	3	3	2771	04	59	43
135	day04	IRF3	-0.210689	1.93601e-06	0.669433	0.700267	2	2	3661	04	59	43
136	day04	LDHA	-0.207943	1.14791e-11	0.768967	0.803867	2	2	3939	04	59	43
137	day04	BTG1	-0.205343	7.9183e-16	0.787333	0.791733	3	3	694	04	59	43
138	day04	CD48	-0.167675	8.19335e-11	0.764111	0.775467	3	3	962	04	59	43
139	day04	SPOCK2	-0.0926869	1.26488e-06	0.844822	0.833467	3	3	9806	04	59	43
140	day04	HLA-A	-0.0236196	1.57039e-08	1	1	3	3	3105	04	59	43
141	day06-07	IGHA1-secreted	-5.58659	1.4481e-26	0.00357778	0.134311	3	3	3493	06-07	63	45
142	day06-07	PTGER2	-3.27868	4.13427e-09	0.0105	0.0869333	2	2	5732	06-07	63	45
143	day06-07	IGHG3-secreted	-2.92462	2.5888e-07	0.00811111	0.0514667	3	3	3502	06-07	63	45
144	day06-07	ab-CD89	-2.63738	8.45557e-12	0.560467	0.6072	3	3	2204	06-07	63	45
145	day06-07	ADGRE1	-2.3514	0.000122149	0.0092	0.0385333	3	3	2015	06-07	63	45
146	day06-07	GZMH	-2.3073	9.02355e-06	0.0106222	0.0478	3	3	2999	06-07	63	45
147	day06-07	CCL4	-2.04119	2.03056e-06	0.0154667	0.0604	3	3	6351	06-07	63	45
148	day06-07	CTSW	-2.03352	1.67724e-10	0.0265556	0.103644	3	3	1521	06-07	63	45
149	day06-07	JCHAIN	-1.96157	8.75665e-16	0.0576889	0.179156	3	3	3512	06-07	63	45
150	day06-07	IGHG2-secreted	-1.86753	2.90173e-14	0.0739556	0.189156	3	3	3501	06-07	63	45
151	day06-07	GZMB	-1.8559	7.19884e-09	0.0306444	0.100533	3	3	3002	06-07	63	45
152	day06-07	KLRK1	-1.77868	3.15005e-14	0.0497333	0.163533	3	3	22914	06-07	63	45
153	day06-07	IGLC3	-1.64826	7.82686e-22	0.1394	0.305267	3	3	3539	06-07	63	45
154	day06-07	DPP4	-1.56964	4.44377e-17	0.0841111	0.227956	3	3	1803	06-07	63	45
155	day06-07	ab-CD56	-1.44952	6.17826e-24	0.520644	0.650489	3	3	4684	06-07	63	45
156	day06-07	ab-CCR7	-1.44055	9.40406e-61	0.879222	0.951111	3	3	1236	06-07	63	45
157	day06-07	XCL2	-1.41367	0.000923778	0.0189111	0.0489778	3	3	6846	06-07	63	45
158	day06-07	CD8A	-1.31605	1.00828e-06	0.0661111	0.134733	3	3	925	06-07	63	45
159	day06-07	CCR7	-1.30701	1.09104e-48	0.276556	0.5744	3	3	1236	06-07	63	45
160	day06-07	GZMK	-1.2871	1.81093e-05	0.0376667	0.0893333	3	3	3003	06-07	63	45
161	day06-07	LGALS1	-1.26601	2.39938e-28	0.201778	0.433111	3	3	3956	06-07	63	45
162	day06-07	IGHM-secreted	-1.25668	5.84845e-14	0.146467	0.2778	3	3	3507	06-07	63	45
163	day06-07	MZB1	-1.19807	2.01527e-05	0.0445111	0.0990444	3	3	51237	06-07	63	45
164	day06-07	IGKC	-1.19313	9.10368e-15	0.215422	0.3318	3	3	3514	06-07	63	45
165	day06-07	CD79B	-1.19284	1.9657e-12	0.109756	0.235844	3	3	974	06-07	63	45
166	day06-07	IFITM3	-1.04645	4.92289e-49	0.367689	0.656311	3	3	10410	06-07	63	45
167	day06-07	SELL	-0.973357	4.4146e-28	0.318	0.529378	3	3	6402	06-07	63	45
168	day06-07	FOSB	-0.956513	3.0445e-05	0.0903778	0.152467	3	3	2354	06-07	63	45
169	day06-07	ab-CD8	-0.849587	4.41641e-18	0.971689	0.986067	3	3	925	06-07	63	45
170	day06-07	LEF1	-0.827968	1.07412e-19	0.319489	0.477067	3	3	51176	06-07	63	45
171	day06-07	JUN	-0.826355	3.65114e-08	0.178267	0.276933	3	3	3725	06-07	63	45
172	day06-07	GPI	-0.812975	4.3861e-50	0.511578	0.761378	3	3	2821	06-07	63	45
173	day06-07	IGHG1-secreted	-0.811094	0.00046335	0.141111	0.190978	3	3	3500	06-07	63	45
174	day06-07	IL7R	-0.80357	2.21882e-30	0.412422	0.639689	3	3	3575	06-07	63	45
175	day06-07	IL23R	-0.764221	4.83284e-18	0.365778	0.482133	3	3	149233	06-07	63	45
176	day06-07	PRF1	-0.755932	9.08121e-05	0.121867	0.187133	3	3	5551	06-07	63	45
177	day06-07	ab-CD127	-0.732621	2.24678e-11	0.7152	0.823767	2	2	3575	06-07	63	45
178	day06-07	CST7	-0.682848	8.42272e-11	0.274311	0.4058	3	3	8530	06-07	63	45
179	day06-07	STAT5A	-0.642164	9.60053e-09	0.270178	0.367222	3	3	6776	06-07	63	45
180	day06-07	IFIT3	-0.600997	5.19447e-20	0.465156	0.656022	3	3	3437	06-07	63	45
181	day06-07	MYC	-0.584095	1.38172e-08	0.2982	0.406933	3	3	4609	06-07	63	45
182	day06-07	ab-CD73	-0.577268	4.04339e-06	0.771133	0.797633	2	2	4907	06-07	63	45
183	day06-07	ab-CD45RA	-0.537811	3.20938e-12	0.972822	0.978911	3	3	5788	06-07	63	45
184	day06-07	S100A10	-0.525868	3.72551e-26	0.561556	0.739	3	3	6281	06-07	63	45
185	day06-07	CD37	-0.500506	1.34e-23	0.621956	0.8618	3	3	951	06-07	63	45
186	day06-07	IL32	-0.485938	1.53937e-10	0.6692	0.970889	3	3	9235	06-07	63	45
187	day06-07	ab-CD62L	-0.455485	4.39503e-35	0.9994	1	3	3	6402	06-07	63	45
188	day06-07	STAT3	-0.416476	6.53164e-07	0.374689	0.445578	3	3	6774	06-07	63	45
189	day06-07	ab-CD39	-0.413006	1.05349e-29	0.997111	0.996556	3	3	953	06-07	63	45
190	day06-07	JUNB	-0.412751	9.80205e-09	0.442978	0.5446	3	3	3726	06-07	63	45
191	day06-07	SELPLG	-0.410245	1.2144e-10	0.497511	0.632511	3	3	6404	06-07	63	45
192	day06-07	ab-CD71	-0.358646	1.9967e-07	0.926978	0.924533	3	3	7037	06-07	63	45
193	day06-07	GIMAP5	-0.317604	1.05267e-07	0.528422	0.612578	3	3	55340	06-07	63	45
194	day06-07	LGALS9	-0.312551	6.08445e-06	0.472556	0.569111	3	3	3965	06-07	63	45
195	day06-07	GNAI2	-0.307684	2.23289e-07	0.498889	0.579178	3	3	2771	06-07	63	45
196	day06-07	ISG15	-0.285602	6.85326e-07	0.659289	0.790511	3	3	9636	06-07	63	45
197	day06-07	ab-CD16	-0.268629	2.37289e-07	0.936467	0.9473	2	2	2214	06-07	63	45
198	day06-07	ab-TCR-gamma-delta	-0.266902	9.55948e-05	0.9648	0.952111	3	3	28526	06-07	63	45
199	day06-07	LDHA	-0.19779	5.75415e-13	0.850367	0.884933	2	2	3939	06-07	63	45
200	day06-07	CD48	-0.167267	3.63757e-11	0.775889	0.799689	3	3	962	06-07	63	45
201	day06-07	BTG1	-0.133874	6.07348e-09	0.826356	0.828111	3	3	694	06-07	63	45
202	day06-07	HLA-A	-0.0255743	2.90557e-07	1	0.998956	3	3	3105	06-07	63	45
203	day06-07	IGHG4-secreted	0	7.08986e-15	0	0.0700667	3	3	3503	06-07	63	45
204	day07-08	IGHA1-secreted	-5.52722	5.02198e-27	0.00357778	0.136711	3	3	3493	07-08	78	62
205	day07-08	PTGER2	-3.27868	4.29464e-09	0.0105	0.0869333	2	2	5732	07-08	78	62
206	day07-08	CD244	-3.08375	2.46652e-06	0.00475556	0.0394	3	3	51744	07-08	78	62
207	day07-08	ab-CD89	-2.72184	2.38473e-11	0.562667	0.6072	3	3	2204	07-08	78	62
208	day07-08	GZMH	-2.61153	6.40544e-09	0.0122667	0.0683111	3	3	2999	07-08	78	62
209	day07-08	CTSW	-2.372	7.08861e-15	0.0255778	0.125778	3	3	1521	07-08	78	62
210	day07-08	GZMB	-2.2748	1.88226e-13	0.0306889	0.125911	3	3	3002	07-08	78	62
211	day07-08	IGHG3-secreted	-2.26385	2.55157e-06	0.0127556	0.0546889	3	3	3502	07-08	78	62
212	day07-08	ADGRE1	-2.11335	3.87081e-05	0.0111556	0.0452889	3	3	2015	07-08	78	62
213	day07-08	CCL4L2	-1.99994	6.93763e-05	0.0120444	0.0454	3	3	9560	07-08	78	62
214	day07-08	CCL4	-1.96777	9.70232e-09	0.0215778	0.0853333	3	3	6351	07-08	78	62
215	day07-08	CCL4L1	-1.91237	0.000559737	0.0111778	0.0381333	3	3	388372	07-08	78	62
216	day07-08	UBE2C	-1.86479	5.72544e-06	0.0147556	0.0568222	3	3	11065	07-08	78	62
217	day07-08	AURKB	-1.84164	6.1748e-06	0.0212889	0.0671556	3	3	9212	07-08	78	62
218	day07-08	DPP4	-1.83817	4.89256e-26	0.0839333	0.275844	3	3	1803	07-08	78	62
219	day07-08	KLRK1	-1.81683	1.94188e-17	0.0545778	0.190444	3	3	22914	07-08	78	62
220	day07-08	IGHG2-secreted	-1.66012	1.33622e-13	0.0704667	0.186622	3	3	3501	07-08	78	62
221	day07-08	FGFBP2	-1.57582	5.5425e-06	0.0293111	0.08	3	3	83888	07-08	78	62
222	day07-08	ab-CD56	-1.50626	6.75485e-27	0.515978	0.659978	3	3	4684	07-08	78	62
223	day07-08	IGLC3	-1.50263	2.63724e-19	0.138022	0.297733	3	3	3539	07-08	78	62
224	day07-08	LGALS1	-1.45901	1.24752e-40	0.196867	0.485933	3	3	3956	07-08	78	62
225	day07-08	CD8A	-1.43035	7.61122e-09	0.0696889	0.154733	3	3	925	07-08	78	62
226	day07-08	XCL2	-1.41495	2.90633e-05	0.0253111	0.0701778	3	3	6846	07-08	78	62
227	day07-08	TK1	-1.41163	3.93949e-07	0.0483556	0.115689	3	3	7083	07-08	78	62
228	day07-08	KIAA0101	-1.37829	0.000156557	0.0329556	0.0748222	3	3	9768	07-08	78	62
229	day07-08	GZMK	-1.3493	7.53638e-07	0.0423556	0.106489	3	3	3003	07-08	78	62
230	day07-08	MZB1	-1.31425	2.10357e-06	0.0450889	0.107178	3	3	51237	07-08	78	62
231	day07-08	CCR7	-1.27148	1.62333e-44	0.273956	0.558422	3	3	1236	07-08	78	62
232	day07-08	JCHAIN	-1.26935	2.29167e-08	0.0774444	0.164089	3	3	3512	07-08	78	62
233	day07-08	ab-CCR7	-1.25764	1.0356e-54	0.873578	0.948556	3	3	1236	07-08	78	62
234	day07-08	CD79B	-1.25504	3.24201e-14	0.109733	0.2494	3	3	974	07-08	78	62
235	day07-08	MCM4	-1.20914	0.000328929	0.0347111	0.0756667	3	3	4173	07-08	78	62
236	day07-08	IGHM-secreted	-1.20456	6.0292e-14	0.154867	0.289222	3	3	3507	07-08	78	62
237	day07-08	NKG7	-1.20238	6.776e-08	0.0966889	0.1826	3	3	4818	07-08	78	62
238	day07-08	IFITM3	-1.077	8.91542e-52	0.3654	0.667711	3	3	10410	07-08	78	62
239	day07-08	IGKC	-1.05084	6.72954e-13	0.209267	0.3264	3	3	3514	07-08	78	62
240	day07-08	IGHG1-secreted	-1.02797	1.10774e-06	0.114067	0.193089	3	3	3500	07-08	78	62
241	day07-08	SELL	-0.959044	5.50914e-27	0.3152	0.530556	3	3	6402	07-08	78	62
242	day07-08	TARP-refseq	-0.956167	5.0492e-05	0.0736889	0.133467	3	3	445347	07-08	78	62
243	day07-08	ab-CD8	-0.927442	8.70515e-20	0.978422	0.985756	3	3	925	07-08	78	62
244	day07-08	PRF1	-0.913676	4.83172e-07	0.123822	0.210689	3	3	5551	07-08	78	62
245	day07-08	CXCR3	-0.843809	6.4942e-06	0.106244	0.1814	3	3	2833	07-08	78	62
246	day07-08	CST7	-0.82965	9.96326e-17	0.2708	0.444689	3	3	8530	07-08	78	62
247	day07-08	NCR3	-0.821854	5.15427e-05	0.104667	0.169911	3	3	259197	07-08	78	62
248	day07-08	GPI	-0.815429	1.50453e-50	0.514844	0.769822	3	3	2821	07-08	78	62
249	day07-08	HLA-DQB1	-0.805214	0.000188112	0.0933556	0.152067	3	3	3119	07-08	78	62
250	day07-08	YBX3	-0.803366	0.000263533	0.0785778	0.135311	3	3	8531	07-08	78	62
251	day07-08	IL7R	-0.79437	7.8332e-27	0.391489	0.616267	3	3	3575	07-08	78	62
252	day07-08	IL23R	-0.782207	3.11248e-19	0.357311	0.492867	3	3	149233	07-08	78	62
253	day07-08	LEF1	-0.759374	1.02123e-15	0.308844	0.453311	3	3	51176	07-08	78	62
254	day07-08	CCL5	-0.738749	9.98865e-07	0.218578	0.307733	3	3	6352	07-08	78	62
255	day07-08	ab-CD127	-0.732621	2.34119e-11	0.7152	0.823767	2	2	3575	07-08	78	62
256	day07-08	IL15RA	-0.725338	0.000131638	0.118956	0.183711	3	3	3601	07-08	78	62
257	day07-08	STAT5A	-0.708239	1.97568e-10	0.253356	0.376844	3	3	6776	07-08	78	62
258	day07-08	JUN	-0.702193	8.31907e-07	0.200022	0.288867	3	3	3725	07-08	78	62
259	day07-08	MYC	-0.637511	3.99732e-10	0.284311	0.4168	3	3	4609	07-08	78	62
260	day07-08	ab-CD73	-0.577268	4.13939e-06	0.771133	0.797633	2	2	4907	07-08	78	62
261	day07-08	ab-CD71	-0.566911	1.88424e-13	0.918978	0.924667	3	3	7037	07-08	78	62
262	day07-08	S100A10	-0.565726	1.17247e-27	0.546467	0.748667	3	3	6281	07-08	78	62
263	day07-08	IFIT3	-0.555948	8.10117e-18	0.476333	0.664311	3	3	3437	07-08	78	62
264	day07-08	ab-CD45RA	-0.536946	2.46741e-13	0.972822	0.978911	3	3	5788	07-08	78	62
265	day07-08	CD37	-0.507561	1.49767e-21	0.617578	0.872844	3	3	951	07-08	78	62
266	day07-08	IL32	-0.498628	4.64755e-13	0.666711	0.970067	3	3	9235	07-08	78	62
267	day07-08	ab-CD39	-0.480625	2.21717e-34	0.997111	0.996556	3	3	953	07-08	78	62
268	day07-08	SELPLG	-0.479388	6.98909e-13	0.478644	0.649	3	3	6404	07-08	78	62
269	day07-08	ab-CD62L	-0.430976	6.32647e-33	0.9994	1	3	3	6402	07-08	78	62
270	day07-08	JUNB	-0.408595	1.49845e-08	0.4454	0.5504	3	3	3726	07-08	78	62
271	day07-08	STAT3	-0.395623	5.18337e-06	0.361933	0.434511	3	3	6774	07-08	78	62
272	day07-08	GNAI2	-0.348783	2.15806e-08	0.490889	0.592889	3	3	2771	07-08	78	62
273	day07-08	TNFSF10	-0.324567	7.7421e-06	0.435778	0.507378	3	3	8743	07-08	78	62
274	day07-08	LGALS9	-0.2935	3.02561e-05	0.473222	0.566622	3	3	3965	07-08	78	62
275	day07-08	GIMAP5	-0.281089	7.50238e-06	0.523333	0.609111	3	3	55340	07-08	78	62
276	day07-08	ISG15	-0.280333	1.12132e-05	0.652289	0.791111	3	3	9636	07-08	78	62
277	day07-08	ab-CD16	-0.268629	2.45591e-07	0.936467	0.9473	2	2	2214	07-08	78	62
278	day07-08	ITGAL	-0.242762	0.000910374	0.598156	0.719311	3	3	3683	07-08	78	62
279	day07-08	CD48	-0.198485	4.21041e-13	0.764756	0.809889	3	3	962	07-08	78	62
280	day07-08	LDHA	-0.19779	6.01187e-13	0.850367	0.884933	2	2	3939	07-08	78	62
281	day07-08	CD3E	-0.0477522	7.19453e-08	0.9534	0.947267	3	3	916	07-08	78	62
282	day10	IGHA1-secreted	-4.30405	8.83126e-25	0.00886667	0.139044	3	3	3493	10	103	85
283	day10	GZMH	-3.33736	1.65571e-11	0.00897778	0.0750889	3	3	2999	10	103	85
284	day10	CXCL10	-3.06447	1.43953e-07	0.00744444	0.0513556	3	3	3627	10	103	85
285	day10	PTGER2	-2.90306	2.90272e-08	0.0126667	0.0849333	2	2	5732	10	103	85
286	day10	GZMB	-2.83749	8.59795e-15	0.0151333	0.105178	3	3	3002	10	103	85
287	day10	IGHG3-secreted	-2.83342	5.69818e-13	0.0134444	0.0923111	3	3	3502	10	103	85
288	day10	ab-CD89	-2.77194	1.31188e-10	0.504467	0.560956	3	3	2204	10	103	85
289	day10	CD244	-2.5663	0.000132975	0.0056	0.0314667	3	3	51744	10	103	85
290	day10	CCL4L2	-2.42594	5.21862e-06	0.0109111	0.0493111	3	3	9560	10	103	85
291	day10	ZNF683	-2.40434	3.25062e-06	0.0100889	0.0491556	3	3	257101	10	103	85
292	day10	CCL4L1	-2.40324	9.55618e-06	0.0102444	0.0464444	3	3	388372	10	103	85
293	day10	ADGRE1	-2.35578	6.69267e-05	0.00757778	0.0368	3	3	2015	10	103	85
294	day10	CCL4	-2.33847	1.06634e-10	0.0180667	0.0895333	3	3	6351	10	103	85
295	day10	TYROBP	-2.33774	0.00040054	0.00731111	0.0317333	3	3	7305	10	103	85
296	day10	CTSW	-2.32529	7.0772e-18	0.0310222	0.151489	3	3	1521	10	103	85
297	day10	FASLG	-2.23476	2.01465e-05	0.0103111	0.0450889	3	3	356	10	103	85
298	day10	AURKB	-2.17688	1.22703e-07	0.0171556	0.0704444	3	3	9212	10	103	85
299	day10	MKI67	-2.16254	1.70612e-05	0.00922222	0.0438222	3	3	4288	10	103	85
300	day10	DPP4	-1.99636	1.76389e-26	0.0656	0.254267	3	3	1803	10	103	85
301	day10	CCL3L1	-1.96679	9.91201e-05	0.0124	0.0443778	3	3	6349	10	103	85
302	day10	KLRK1	-1.92264	7.55249e-19	0.0506	0.191467	3	3	22914	10	103	85
303	day10	UBE2C	-1.89886	1.98182e-05	0.0152889	0.0540889	3	3	11065	10	103	85
304	day10	HMMR	-1.88441	0.000731378	0.00906667	0.0336222	3	3	3161	10	103	85
305	day10	GZMK	-1.84909	3.89096e-12	0.0351778	0.127889	3	3	3003	10	103	85
306	day10	IL17F	-1.79992	0.000312171	0.0152667	0.0464444	3	3	112744	10	103	85
307	day10	ab-CD56	-1.75388	6.20474e-27	0.474333	0.634778	3	3	4684	10	103	85
308	day10	KIAA0101	-1.72136	9.49814e-08	0.0266222	0.0878889	3	3	9768	10	103	85
309	day10	KLRC1	-1.71963	0.000167975	0.0112667	0.0414222	3	3	3821	10	103	85
310	day10	CD8A	-1.69015	7.08457e-12	0.0599111	0.1608	3	3	925	10	103	85
311	day10	KLRC2	-1.67045	3.13075e-05	0.0171556	0.0558222	3	3	3822	10	103	85
312	day10	NKG7	-1.59687	1.18747e-13	0.0822222	0.202133	3	3	4818	10	103	85
313	day10	CCR1	-1.57716	4.40409e-08	0.0348444	0.103133	3	3	1230	10	103	85
314	day10	IGHG2-secreted	-1.57214	6.14242e-13	0.0806222	0.195444	3	3	3501	10	103	85
315	day10	IFITM3	-1.52927	6.34103e-105	0.311822	0.786867	3	3	10410	10	103	85
316	day10	LGALS1	-1.51082	6.05242e-50	0.205289	0.543	3	3	3956	10	103	85
317	day10	CD79B	-1.50036	1.43112e-23	0.106089	0.3048	3	3	974	10	103	85
318	day10	CD300A	-1.40286	3.64542e-06	0.0320667	0.0856889	3	3	11314	10	103	85
319	day10	IGLC3	-1.39425	3.69409e-19	0.154133	0.3158	3	3	3539	10	103	85
320	day10	JCHAIN	-1.38664	1.20453e-10	0.0738889	0.1746	3	3	3512	10	103	85
321	day10	ab-CCR7	-1.28368	9.65405e-53	0.857711	0.933533	3	3	1236	10	103	85
322	day10	HLA-DQB1	-1.28179	5.86672e-11	0.0833333	0.191911	3	3	3119	10	103	85
323	day10	MCM4	-1.27605	3.10161e-06	0.0411556	0.100422	3	3	4173	10	103	85
324	day10	TYMS	-1.27137	2.22117e-06	0.0547556	0.119378	3	3	7298	10	103	85
325	day10	TK1	-1.26923	6.04599e-07	0.0552889	0.1246	3	3	7083	10	103	85
326	day10	MZB1	-1.26032	1.54612e-06	0.0426	0.105356	3	3	51237	10	103	85
327	day10	CCR7	-1.2358	4.09894e-42	0.268422	0.556444	3	3	1236	10	103	85
328	day10	CXCR3	-1.21723	3.40189e-14	0.108244	0.250222	3	3	2833	10	103	85
329	day10	PRF1	-1.18893	2.97815e-13	0.126133	0.258244	3	3	5551	10	103	85
330	day10	IL18RAP	-1.18867	1.63518e-05	0.0448667	0.0998444	3	3	8807	10	103	85
331	day10	IGHG1-secreted	-1.13113	1.53826e-08	0.110956	0.203156	3	3	3500	10	103	85
332	day10	CD70	-1.11235	0.000308491	0.0334444	0.0738667	3	3	970	10	103	85
333	day10	TARP-refseq	-1.10627	9.05767e-06	0.0572	0.117889	3	3	445347	10	103	85
334	day10	IGHM-secreted	-1.05666	9.2706e-13	0.160044	0.2956	3	3	3507	10	103	85
335	day10	SELL	-1.04994	1.48509e-26	0.257733	0.491756	3	3	6402	10	103	85
336	day10	YBX3	-1.04527	4.6018e-07	0.0785111	0.158667	3	3	8531	10	103	85
337	day10	IGKC	-1.04492	3.91429e-14	0.212956	0.343911	3	3	3514	10	103	85
338	day10	IL23R	-1.00799	3.95856e-23	0.271133	0.460622	3	3	149233	10	103	85
339	day10	ab-CD8	-0.977545	6.07447e-24	0.979111	0.993578	3	3	925	10	103	85
340	day10	GZMA	-0.933697	1.35774e-08	0.133311	0.233778	3	3	3001	10	103	85
341	day10	IL2RA	-0.926227	3.46883e-08	0.104289	0.204	3	3	3559	10	103	85
342	day10	ab-CD71	-0.879172	7.9214e-32	0.931867	0.954222	3	3	7037	10	103	85
343	day10	CST7	-0.860588	2.58713e-22	0.298711	0.529956	3	3	8530	10	103	85
344	day10	NCR3	-0.843013	1.02442e-06	0.117956	0.205933	3	3	259197	10	103	85
345	day10	MYC	-0.75028	1.46734e-12	0.248178	0.406711	3	3	4609	10	103	85
346	day10	LAMP3	-0.722895	1.98987e-05	0.120956	0.197533	3	3	27074	10	103	85
347	day10	IFIT3	-0.717561	4.53013e-34	0.487311	0.7626	3	3	3437	10	103	85
348	day10	STAT5A	-0.715021	1.92379e-12	0.266111	0.425622	3	3	6776	10	103	85
349	day10	ENTPD1	-0.707914	2.23163e-05	0.0983556	0.1744	3	3	953	10	103	85
350	day10	C10orf54	-0.705218	2.64007e-11	0.237489	0.400867	3	3	64115	10	103	85
351	day10	CCL5	-0.67246	6.59703e-08	0.272578	0.374289	3	3	6352	10	103	85
352	day10	TNFSF10	-0.669235	6.15291e-18	0.372333	0.5546	3	3	8743	10	103	85
353	day10	IL15RA	-0.654153	4.95978e-05	0.130444	0.205511	3	3	3601	10	103	85
354	day10	ITGB7	-0.641531	5.09508e-13	0.313867	0.503978	3	3	3695	10	103	85
355	day10	PDIA4	-0.610719	4.38141e-07	0.2052	0.320911	3	3	9601	10	103	85
356	day10	IL7R	-0.600076	8.7558e-14	0.3746	0.553267	3	3	3575	10	103	85
357	day10	LGALS9	-0.599549	2.97124e-20	0.474178	0.714222	3	3	3965	10	103	85
358	day10	SELPLG	-0.586173	7.76388e-21	0.485489	0.715289	3	3	6404	10	103	85
359	day10	CD320	-0.561093	9.6706e-06	0.1954	0.293	3	3	51293	10	103	85
360	day10	GPI	-0.557415	8.42358e-22	0.531644	0.755267	3	3	2821	10	103	85
361	day10	IL32	-0.541227	1.23328e-16	0.669933	0.993289	3	3	9235	10	103	85
362	day10	LEF1	-0.531079	3.29793e-07	0.288089	0.389956	3	3	51176	10	103	85
363	day10	ISG15	-0.530527	1.08048e-26	0.657889	0.934822	3	3	9636	10	103	85
364	day10	ab-CD39	-0.526083	2.11915e-56	0.999778	1	3	3	953	10	103	85
365	day10	HLA-DPA1	-0.507087	1.17896e-06	0.2808	0.382667	3	3	3113	10	103	85
366	day10	STAT3	-0.501923	9.5941e-08	0.3206	0.442156	3	3	6774	10	103	85
367	day10	CASP3	-0.491047	4.56676e-05	0.215333	0.312822	3	3	836	10	103	85
368	day10	GNAI2	-0.474493	6.82126e-12	0.455733	0.623867	3	3	2771	10	103	85
369	day10	ab-CD62L	-0.466827	2.01741e-24	0.996956	0.998733	3	3	6402	10	103	85
370	day10	S100A10	-0.461371	4.27344e-18	0.556244	0.736267	3	3	6281	10	103	85
371	day10	TNFRSF4	-0.457117	0.000649523	0.190867	0.264867	3	3	7293	10	103	85
372	day10	CD37	-0.447009	5.28442e-11	0.6172	0.8724	3	3	951	10	103	85
373	day10	JUNB	-0.429652	1.44944e-06	0.358756	0.481067	3	3	3726	10	103	85
374	day10	ARL4C	-0.422173	3.54552e-06	0.337067	0.453644	3	3	10123	10	103	85
375	day10	ab-CD183	-0.403772	1.09281e-09	0.983167	0.987033	2	2	2833	10	103	85
376	day10	ADA	-0.396225	2.9553e-05	0.320333	0.417222	3	3	100	10	103	85
377	day10	GIMAP5	-0.367727	1.272e-08	0.532778	0.689422	3	3	55340	10	103	85
378	day10	ITGAL	-0.351049	4.38724e-05	0.601489	0.809178	3	3	3683	10	103	85
379	day10	ab-CD45RA	-0.332231	2.04381e-05	0.977444	0.985578	3	3	5788	10	103	85
380	day10	CD48	-0.185383	3.52464e-05	0.678489	0.747089	3	3	962	10	103	85
381	day10	IFITM2	-0.146538	6.68642e-11	0.841044	0.883778	3	3	10581	10	103	85
382	day10	CD74	-0.10251	8.03389e-08	0.909844	0.932556	3	3	972	10	103	85
383	day10	LY6E	-0.056645	5.69762e-06	0.984367	0.993133	2	2	4061	10	103	85
384	day10	CD3E	-0.0554033	0.000151277	0.946667	0.958822	3	3	916	10	103	85
385	day12-14	AURKB	-3.32182	2.6362e-11	0.00866667	0.0735111	3	3	9212	12-14	138	100
386	day12-14	UBE2C	-3.20745	1.73085e-08	0.00815556	0.0574889	3	3	11065	12-14	138	100
387	day12-14	KIAA0101	-3.18729	3.97424e-16	0.0117778	0.105133	3	3	9768	12-14	138	100
388	day12-14	GZMH	-3.05099	2.41327e-07	0.007	0.0491333	3	3	2999	12-14	138	100
389	day12-14	CXCL10	-2.72233	3.15923e-07	0.00831111	0.0514889	3	3	3627	12-14	138	100
390	day12-14	ADGRE1	-2.67969	5.50866e-07	0.00651111	0.0464889	3	3	2015	12-14	138	100
391	day12-14	CCL22	-2.65599	0.000405984	0.0044	0.0261778	3	3	6367	12-14	138	100
392	day12-14	HLA-DRB3	-2.62537	1.20081e-10	0.0126889	0.0790444	3	3	3125	12-14	138	100
393	day12-14	HMMR	-2.54378	1.35324e-05	0.00844444	0.0423333	3	3	3161	12-14	138	100
394	day12-14	ab-CD89	-2.47341	4.41456e-16	0.572533	0.672044	3	3	2204	12-14	138	100
395	day12-14	DPP4	-2.4042	1.2449e-43	0.0614222	0.3282	3	3	1803	12-14	138	100
396	day12-14	IGHG4-secreted	-2.36684	2.85392e-09	0.0150667	0.0762889	3	3	3503	12-14	138	100
397	day12-14	TYMS	-2.22746	5.30988e-14	0.0303778	0.1296	3	3	7298	12-14	138	100
398	day12-14	ITGAX	-2.08537	3.79601e-13	0.0272444	0.120867	3	3	3687	12-14	138	100
399	day12-14	IL17F	-2.01395	6.1372e-07	0.0193333	0.07	3	3	112744	12-14	138	100
400	day12-14	TK1	-1.98141	4.85778e-12	0.0386	0.1308	3	3	7083	12-14	138	100
401	day12-14	ab-CD56	-1.97601	9.84439e-34	0.3736	0.584822	3	3	4684	12-14	138	100
402	day12-14	CTSW	-1.95687	8.05507e-12	0.0304889	0.118644	3	3	1521	12-14	138	100
403	day12-14	GZMB	-1.94072	1.78601e-07	0.0212667	0.0767111	3	3	3002	12-14	138	100
404	day12-14	CCL3L1	-1.93299	4.87413e-05	0.0119333	0.0458444	3	3	6349	12-14	138	100
405	day12-14	CCL4L1	-1.88364	0.000108335	0.0115778	0.0430222	3	3	388372	12-14	138	100
406	day12-14	MCM4	-1.8774	1.19314e-11	0.0323111	0.120911	3	3	4173	12-14	138	100
407	day12-14	GZMK	-1.80455	3.96963e-10	0.0284889	0.106244	3	3	3003	12-14	138	100
408	day12-14	IGHG3-secreted	-1.78528	1.19601e-08	0.0247333	0.0905778	3	3	3502	12-14	138	100
409	day12-14	KLRK1	-1.75211	5.28906e-13	0.0394	0.141822	3	3	22914	12-14	138	100
410	day12-14	CD79B	-1.74701	7.64404e-32	0.0934	0.334622	3	3	974	12-14	138	100
411	day12-14	FGFBP2	-1.68714	8.44032e-05	0.018	0.0542	3	3	83888	12-14	138	100
412	day12-14	CCL4L2	-1.68564	0.000103989	0.0147111	0.0486	3	3	9560	12-14	138	100
413	day12-14	IER3	-1.67223	2.31489e-06	0.0200889	0.0681111	3	3	8870	12-14	138	100
414	day12-14	CCL4	-1.66237	3.05623e-07	0.0281778	0.0870667	3	3	6351	12-14	138	100
415	day12-14	HLA-DQB1	-1.57827	3.72085e-19	0.0760444	0.237444	3	3	3119	12-14	138	100
416	day12-14	NKG7	-1.57626	4.95272e-11	0.0629778	0.1624	3	3	4818	12-14	138	100
417	day12-14	IFITM3	-1.56802	6.38998e-101	0.292333	0.7818	3	3	10410	12-14	138	100
418	day12-14	TMEM97	-1.56509	1.05757e-05	0.0159111	0.0572889	3	3	27346	12-14	138	100
419	day12-14	LGALS1	-1.55266	1.63652e-56	0.206778	0.579378	3	3	3956	12-14	138	100
420	day12-14	CCR7	-1.4193	1.93857e-43	0.208356	0.516022	3	3	1236	12-14	138	100
421	day12-14	IGHA1-secreted	-1.39337	3.4494e-14	0.0789111	0.211622	3	3	3493	12-14	138	100
422	day12-14	ab-CD71	-1.35137	3.43969e-50	0.879467	0.931822	3	3	7037	12-14	138	100
423	day12-14	TOP2A	-1.33117	1.35522e-06	0.0376222	0.098	3	3	7153	12-14	138	100
424	day12-14	CCR1	-1.32349	2.28375e-07	0.0417556	0.1096	3	3	1230	12-14	138	100
425	day12-14	XCL2	-1.3	3.71738e-06	0.0348	0.0907333	3	3	6846	12-14	138	100
426	day12-14	CD8A	-1.2838	3.41205e-06	0.0498889	0.111022	3	3	925	12-14	138	100
427	day12-14	CD300A	-1.2535	0.000348108	0.0254444	0.0616889	3	3	11314	12-14	138	100
428	day12-14	CD70	-1.23441	3.05923e-05	0.034	0.0825333	3	3	970	12-14	138	100
429	day12-14	ab-CCR7	-1.22969	1.82049e-45	0.826756	0.919889	3	3	1236	12-14	138	100
430	day12-14	LIF	-1.19463	3.57702e-05	0.0380222	0.0877111	3	3	3976	12-14	138	100
431	day12-14	TNFRSF8	-1.17973	5.51389e-05	0.0324	0.0787111	3	3	943	12-14	138	100
432	day12-14	MCM2	-1.15602	6.47113e-08	0.0658444	0.147711	3	3	4171	12-14	138	100
433	day12-14	CXCR3	-1.11092	1.38591e-13	0.115289	0.260911	3	3	2833	12-14	138	100
434	day12-14	NCR3	-1.09421	4.40513e-11	0.0977556	0.218533	3	3	259197	12-14	138	100
435	day12-14	ICAM1	-1.04661	3.92002e-06	0.0508	0.1152	3	3	3383	12-14	138	100
436	day12-14	IL23R	-1.03402	1.23013e-25	0.260444	0.475044	3	3	149233	12-14	138	100
437	day12-14	VEGFA	-0.977119	2.48602e-07	0.0740889	0.158556	3	3	7422	12-14	138	100
438	day12-14	IL18RAP	-0.965235	2.00309e-05	0.0567556	0.117156	3	3	8807	12-14	138	100
439	day12-14	MZB1	-0.943147	3.09932e-05	0.0534222	0.111356	3	3	51237	12-14	138	100
440	day12-14	TFRC	-0.904553	5.70751e-09	0.180433	0.332867	2	2	7037	12-14	138	100
441	day12-14	MYC	-0.897158	3.00056e-17	0.221911	0.423044	3	3	4609	12-14	138	100
442	day12-14	JCHAIN	-0.892434	9.87316e-09	0.119044	0.228822	3	3	3512	12-14	138	100
443	day12-14	ab-CD8	-0.885214	1.26339e-21	0.963222	0.982822	3	3	925	12-14	138	100
444	day12-14	IFIT3	-0.87091	4.57704e-42	0.431978	0.772933	3	3	3437	12-14	138	100
445	day12-14	YBX3	-0.867426	8.39332e-07	0.0925778	0.179156	3	3	8531	12-14	138	100
446	day12-14	PRF1	-0.866385	1.51245e-08	0.131711	0.242978	3	3	5551	12-14	138	100
447	day12-14	TARP-refseq	-0.851346	0.000159324	0.0741556	0.130511	3	3	445347	12-14	138	100
448	day12-14	TNFSF10	-0.848827	7.69909e-27	0.345378	0.615467	3	3	8743	12-14	138	100
449	day12-14	CD40LG	-0.848652	4.31949e-05	0.0616667	0.122111	3	3	959	12-14	138	100
450	day12-14	IL2RA	-0.838896	8.37491e-08	0.115178	0.217422	3	3	3559	12-14	138	100
451	day12-14	IL15RA	-0.837855	1.96589e-07	0.102667	0.199267	3	3	3601	12-14	138	100
452	day12-14	SELL	-0.79848	2.34159e-16	0.271	0.474333	3	3	6402	12-14	138	100
453	day12-14	GPI	-0.78617	1.41449e-39	0.463578	0.749156	3	3	2821	12-14	138	100
454	day12-14	ITGB7	-0.761279	5.15107e-19	0.3198	0.560222	3	3	3695	12-14	138	100
455	day12-14	CASP3	-0.759489	1.51072e-10	0.192044	0.350156	3	3	836	12-14	138	100
456	day12-14	LGALS9	-0.75327	2.2699e-34	0.461822	0.766089	3	3	3965	12-14	138	100
457	day12-14	HLA-DRA	-0.73735	1.28194e-09	0.204822	0.3386	3	3	3122	12-14	138	100
458	day12-14	HLA-DPA1	-0.733118	1.03005e-14	0.2872	0.468822	3	3	3113	12-14	138	100
459	day12-14	JUN	-0.713727	1.29854e-07	0.154556	0.267733	3	3	3725	12-14	138	100
460	day12-14	TNF	-0.70561	2.19822e-08	0.178867	0.305644	3	3	7124	12-14	138	100
461	day12-14	GZMA	-0.695819	2.30152e-05	0.134067	0.211356	3	3	3001	12-14	138	100
462	day12-14	IL18R1	-0.676884	0.000246566	0.0806222	0.140489	3	3	8809	12-14	138	100
463	day12-14	CST7	-0.676635	4.0412e-16	0.340933	0.573556	3	3	8530	12-14	138	100
464	day12-14	STAT5A	-0.675454	8.02976e-13	0.295444	0.482044	3	3	6776	12-14	138	100
465	day12-14	C10orf54	-0.675193	2.32458e-11	0.257333	0.428889	3	3	64115	12-14	138	100
466	day12-14	JUNB	-0.662697	1.72916e-12	0.298333	0.493333	3	3	3726	12-14	138	100
467	day12-14	IL12RB2	-0.659343	3.28898e-05	0.102556	0.179711	3	3	3595	12-14	138	100
468	day12-14	CD82	-0.624685	4.68396e-06	0.139467	0.237844	3	3	3732	12-14	138	100
469	day12-14	CCND2	-0.610083	1.89094e-06	0.169933	0.279667	3	3	894	12-14	138	100
470	day12-14	IGHM-secreted	-0.595801	2.41947e-08	0.258756	0.396444	3	3	3507	12-14	138	100
471	day12-14	CCL5	-0.591366	1.60442e-06	0.250356	0.350689	3	3	6352	12-14	138	100
472	day12-14	TNFSF8	-0.59016	2.03382e-06	0.188222	0.299422	3	3	944	12-14	138	100
473	day12-14	PCNA	-0.583453	9.58231e-07	0.241644	0.353822	3	3	5111	12-14	138	100
474	day12-14	IL12RB1	-0.56948	1.9257e-06	0.199711	0.313867	3	3	3594	12-14	138	100
475	day12-14	IL32	-0.567953	1.90233e-26	0.666311	0.994933	3	3	9235	12-14	138	100
476	day12-14	CD320	-0.548396	5.43993e-06	0.191133	0.304444	3	3	51293	12-14	138	100
477	day12-14	SLC1A5	-0.538851	5.13456e-05	0.2573	0.383	2	2	6510	12-14	138	100
478	day12-14	IGLC3	-0.536149	1.22945e-13	0.460111	0.650867	3	3	3539	12-14	138	100
479	day12-14	LEF1	-0.534667	8.21118e-07	0.245556	0.364578	3	3	51176	12-14	138	100
480	day12-14	STAT3	-0.528169	6.88065e-08	0.299867	0.446533	3	3	6774	12-14	138	100
481	day12-14	GNAI2	-0.528018	5.31665e-14	0.471356	0.688889	3	3	2771	12-14	138	100
482	day12-14	SELPLG	-0.520115	4.59974e-16	0.5044	0.733133	3	3	6404	12-14	138	100
483	day12-14	ISG15	-0.511234	1.57662e-24	0.664622	0.942578	3	3	9636	12-14	138	100
484	day12-14	TNFRSF25	-0.509832	3.30715e-05	0.182822	0.281267	3	3	8718	12-14	138	100
485	day12-14	LTB	-0.497796	1.15443e-05	0.216889	0.324511	3	3	4050	12-14	138	100
486	day12-14	S100A10	-0.497517	1.22295e-14	0.477111	0.665778	3	3	6281	12-14	138	100
487	day12-14	CD37	-0.488141	3.86593e-13	0.609378	0.892133	3	3	951	12-14	138	100
488	day12-14	APOBEC3G	-0.474088	1.35824e-06	0.308467	0.445956	3	3	60489	12-14	138	100
489	day12-14	PDIA4	-0.47202	4.25569e-05	0.223222	0.332089	3	3	9601	12-14	138	100
490	day12-14	ADA	-0.46967	1.50326e-06	0.309756	0.4482	3	3	100	12-14	138	100
491	day12-14	IGHG2-secreted	-0.466489	5.34457e-07	0.340156	0.481911	3	3	3501	12-14	138	100
492	day12-14	TRAT1	-0.465084	1.56663e-05	0.245644	0.370067	3	3	50852	12-14	138	100
493	day12-14	ab-CD23	-0.45871	1.91475e-09	0.743833	0.851767	2	2	2208	12-14	138	100
494	day12-14	ITGAL	-0.454067	7.4593e-12	0.585133	0.830956	3	3	3683	12-14	138	100
495	day12-14	ab-CD39	-0.448409	1.93865e-38	0.9994	1	3	3	953	12-14	138	100
496	day12-14	ab-CD11c	-0.446275	7.33481e-10	0.9093	0.9343	2	2	3687	12-14	138	100
497	day12-14	IGHG1-secreted	-0.445869	3.51286e-05	0.269689	0.379711	3	3	3500	12-14	138	100
498	day12-14	ab-CD62L	-0.432619	2.53788e-22	0.998556	0.998422	3	3	6402	12-14	138	100
499	day12-14	PFKP	-0.430559	1.85028e-07	0.403867	0.560844	3	3	5214	12-14	138	100
500	day12-14	GIMAP5	-0.426027	1.20988e-11	0.536556	0.732244	3	3	55340	12-14	138	100
501	day12-14	ANXA5	-0.39827	4.74727e-06	0.378533	0.519467	3	3	308	12-14	138	100
502	day12-14	OASL	-0.386016	6.98149e-06	0.376133	0.510533	3	3	8638	12-14	138	100
503	day12-14	ARL4C	-0.383817	6.34605e-05	0.336822	0.470222	3	3	10123	12-14	138	100
504	day12-14	IGKC	-0.380983	1.44088e-09	0.549067	0.664	3	3	3514	12-14	138	100
505	day12-14	VPS28	-0.371551	5.95826e-05	0.4176	0.578889	3	3	51160	12-14	138	100
506	day12-14	IL7R	-0.329441	7.12467e-05	0.378556	0.491089	3	3	3575	12-14	138	100
507	day12-14	CASP5	-0.325618	0.000606351	0.339711	0.453756	3	3	838	12-14	138	100
508	day12-14	BAX	-0.290939	5.28584e-05	0.500222	0.623356	3	3	581	12-14	138	100
509	day12-14	ab-CD183	-0.284117	3.16596e-11	0.9977	1	2	2	2833	12-14	138	100
510	day12-14	ab-CD25	-0.247094	5.2297e-11	0.995178	0.998	3	3	3559	12-14	138	100
511	day12-14	LDHA	-0.240917	1.12646e-08	0.732333	0.8102	2	2	3939	12-14	138	100
512	day12-14	LAP3	-0.230005	0.00010055	0.581156	0.682711	3	3	51056	12-14	138	100
513	day12-14	IFITM2	-0.138316	2.51285e-06	0.852044	0.9158	3	3	10581	12-14	138	100
514	day12-14	S100A4	-0.127381	0.000107695	0.826578	0.884356	3	3	6275	12-14	138	100
515	day12-14	ab-CD45	-0.0934121	1.04031e-05	1	1	2	2	5788	12-14	138	100
516	day12-14	MT-CO1	-0.0801928	7.84667e-14	0.994033	0.9983	2	2	4512	12-14	138	100
517	day12-14	CD74	-0.0786582	7.98989e-06	0.935378	0.950289	3	3	972	12-14	138	100
518	day12-14	ENO1	-0.0561161	3.03745e-05	0.958156	0.953956	3	3	2023	12-14	138	100
519	day12-14	ab-CD95	-0.0556583	4.82651e-05	1	1	2	2	355	12-14	138	100
520	day12-14	MT-CO2	-0.0550526	5.71793e-10	0.997233	0.997733	2	2	4513	12-14	138	100
521	day12-14	LY6E	-0.0342458	8.5227e-05	0.996133	0.9953	2	2	4061	12-14	138	100
522	day12-14	GAPDH	-0.0327924	4.80865e-07	0.996644	0.990267	3	3	2597	12-14	138	100
