# Supplementary material for: Young children have limited mucosal immunity when stimulated with an influenza vaccine in tonsil organoids
Source: Research Square preprint supplement (doi:10.21203/rs.3.rs-7842732/v1), 2025-10-30
Supplement: Supplementary file 5 [file 86c4e3c9383fb0cbdd5273be.xlsx]

## Sheet: Luminex cytokine ttest
cytokines	p	diff	log2FC	p_adj
FLT3L	0.00059403	180.917	1.27882	0.0536587
IL15	0.00116649	11.0208	0.393294	0.0536587
IL17F	0.00511077	2056.42	1.16763	0.0861127
VEGF	0.0086678	364.785	1.46572	0.11392
CTACK.CCL27	0.0114103	5.63889	0.405775	0.131219
CHEX1.2	0.0188133	293.087	0.0217431	0.192313
IL9	0.0284627	143.785	1.37445	0.212727
MIP1B.CCL4	0.0354207	7581.73	0.409031	0.212727
TNFB.LYMPHOTOXINA	0.0369961	16.4792	0.214923	0.212727
IL2	0.0396737	97.3924	0.877182	0.214705
MIP1A.CCL3	0.0600994	6947.97	1.86068	0.246959
IL4	0.0612474	9.05208	0.204578	0.246959
TRAIL.TNFSF10	0.0860516	181.969	0.787785	0.282342
FRACTALKINE.CX3CL1	0.0976156	1.64236	0.153405	0.282342
IL17A.CTLA8	0.115639	4031.74	0.584237	0.305475
TNFA	0.184282	533.503	0.440962	0.423847
TGFA	0.192351	6.88542	0.178324	0.430098
RANTES.CCL5	0.215496	1975.19	0.398871	0.455777
EOTAXIN.CCL11	0.24383	1.24306	0.0841556	0.486156
CHEX1	0.248362	149.705	0.0105141	0.486156
IP.10.CXCL10	0.275058	1531.23	0.0830189	0.506106
RESISTIN	0.282831	432.417	0.618969	0.510205
IL20	0.302019	2.58681	0.262841	0.534341
MIG.CXCL9	0.323104	4371.92	0.190641	0.550473
IL23	0.35307	0.621528	0.0504283	0.59059
IFNG	0.419466	2954.54	0.248036	0.635946
SCD40L	0.42166	1.08681	0.0494073	0.635946
IL13	0.444086	36.309	0.295937	0.658967
MDC.CCL22	0.506678	412.674	0.0255081	0.713288
CHEX1.1	0.508794	69.4688	0.00514436	0.713288
SCF	0.518263	32.3715	0.281114	0.713288
CHEX4.2	0.539525	0.482639	0.0453582	0.713288
IL3	0.539537	16.7326	0.369279	0.713288
CSF2.GMCSF	0.549584	640.604	0.127923	0.713288
CHEX3.2	0.613679	10.0174	0.013024	0.773404
LIF	0.645769	11.7951	0.128505	0.791684
IL27	0.64959	8.27778	0.126306	0.791684
EOTAXIN3.CCL26	0.658216	1.64583	0.0437802	0.791684
TARC.CCL17	0.663182	633.354	0.107732	0.791684
X6CKINE.CCL21.EXODUS2	0.73394	0.420139	0.0402206	0.841185
CHEX4	0.771781	0.232639	0.0203692	0.8659
PDGF.AA.AB	0.787446	2.53819	0.0221164	0.872832
CHEX4.1	0.891109	0.197917	0.0148854	0.928922
IL5	0.906717	28.4444	0.0878478	0.928922
SFAS.TNFRSF6	0.908728	2.30903	0.0250236	0.928922

## Sheet: Luminex cytokine module ttest
module	cytokine	count	p	fdr	FC	k
4	CTACK.CCL27	15	0.00101132	0.0111245	1.42205	11
4	FLT3L	15	0.00101132	0.0111245	1.42205	11
4	FRACTALKINE.CX3CL1	15	0.00101132	0.0111245	1.42205	11
4	IL12P40	15	0.00101132	0.0111245	1.42205	11
4	IL15	15	0.00101132	0.0111245	1.42205	11
4	IL17F	15	0.00101132	0.0111245	1.42205	11
4	IL2	15	0.00101132	0.0111245	1.42205	11
4	IL9	15	0.00101132	0.0111245	1.42205	11
4	IP.10.CXCL10	15	0.00101132	0.0111245	1.42205	11
4	MIG.CXCL9	15	0.00101132	0.0111245	1.42205	11
4	RANTES.CCL5	15	0.00101132	0.0111245	1.42205	11
4	TNFB.LYMPHOTOXINA	15	0.00101132	0.0111245	1.42205	11
4	TRAIL.TNFSF10	15	0.00101132	0.0111245	1.42205	11
4	VEGF	15	0.00101132	0.0111245	1.42205	11
4	X6CKINE.CCL21.EXODUS2	15	0.00101132	0.0111245	1.42205	11
11	BCA1.CXCL13	4	0.00978744	0.0358873	-1.17265	11
11	IL16	4	0.00978744	0.0358873	-1.17265	11
11	LEPTIN	4	0.00978744	0.0358873	-1.17265	11
11	MCP4.CCL13	4	0.00978744	0.0358873	-1.17265	11
9	MCP1.CCL2	4	0.008094	0.0358873	-1.21847	11
9	MCP2.CCL8	4	0.008094	0.0358873	-1.21847	11
9	MCP3.CCL7	4	0.008094	0.0358873	-1.21847	11
9	TPO	4	0.008094	0.0358873	-1.21847	11
5	CSF1.MCFS	14	0.0175257	0.0481958	-1.09922	11
5	ENA.78.CXCL5.LIX	14	0.0175257	0.0481958	-1.09922	11
5	EOTAXIN2.CCL24.MPIF2	14	0.0175257	0.0481958	-1.09922	11
5	GCSF.CSF3	14	0.0175257	0.0481958	-1.09922	11
5	GROA.KC.CXCL1	14	0.0175257	0.0481958	-1.09922	11
5	IL1RA	14	0.0175257	0.0481958	-1.09922	11
5	IL33	14	0.0175257	0.0481958	-1.09922	11
5	IL8.CXCL8	14	0.0175257	0.0481958	-1.09922	11
5	MIF	14	0.0175257	0.0481958	-1.09922	11
5	PAI1.SERPINE1	14	0.0175257	0.0481958	-1.09922	11
5	SDF1	14	0.0175257	0.0481958	-1.09922	11
5	SICAM1	14	0.0175257	0.0481958	-1.09922	11
5	SVCAM1	14	0.0175257	0.0481958	-1.09922	11
5	TSLP	14	0.0175257	0.0481958	-1.09922	11
10	MIP1A.CCL3	2	0.0286325	0.0629916	1.05652	11
10	MIP1B.CCL4	2	0.0286325	0.0629916	1.05652	11
3	EOTAXIN.CCL11	6	0.140972	0.258448	0.735703	11
3	IFNG	6	0.140972	0.258448	0.735703	11
3	IL17A.CTLA8	6	0.140972	0.258448	0.735703	11
3	IL4	6	0.140972	0.258448	0.735703	11
3	SFAS.TNFRSF6	6	0.140972	0.258448	0.735703	11
3	TGFA	6	0.140972	0.258448	0.735703	11
7	FASL	7	0.352222	0.553492	-0.452717	11
7	IFNA	7	0.352222	0.553492	-0.452717	11
7	IL17E.IL25	7	0.352222	0.553492	-0.452717	11
7	IL18	7	0.352222	0.553492	-0.452717	11
7	IL22	7	0.352222	0.553492	-0.452717	11
7	IL28A.IFNL2	7	0.352222	0.553492	-0.452717	11
7	MIP1D.MIP5.CCL15	7	0.352222	0.553492	-0.452717	11
2	EGF	7	0.803879	0.954518	0.124938	11
2	EOTAXIN3.CCL26	7	0.803879	0.954518	0.124938	11
2	HGF	7	0.803879	0.954518	0.124938	11
2	IL12P70	7	0.803879	0.954518	0.124938	11
2	IL23	7	0.803879	0.954518	0.124938	11
2	MDC.CCL22	7	0.803879	0.954518	0.124938	11
2	SCF	7	0.803879	0.954518	0.124938	11
1	FGF2.FGFB	13	0.828384	0.954518	0.109707	11
1	IL10	13	0.828384	0.954518	0.109707	11
1	IL1A	13	0.828384	0.954518	0.109707	11
1	IL1B	13	0.828384	0.954518	0.109707	11
1	IL20	13	0.828384	0.954518	0.109707	11
1	IL27	13	0.828384	0.954518	0.109707	11
1	IL3	13	0.828384	0.954518	0.109707	11
1	IL6	13	0.828384	0.954518	0.109707	11
1	PDGFAA	13	0.828384	0.954518	0.109707	11
1	RESISTIN	13	0.828384	0.954518	0.109707	11
1	SCD40L	13	0.828384	0.954518	0.109707	11
1	TARC.CCL17	13	0.828384	0.954518	0.109707	11
1	TNFA	13	0.828384	0.954518	0.109707	11
6	CSF2.GMCSF	6	0.942691	0.954518	0.0364926	11
6	I309.CCL1	6	0.942691	0.954518	0.0364926	11
6	IL13	6	0.942691	0.954518	0.0364926	11
6	IL21	6	0.942691	0.954518	0.0364926	11
6	IL5	6	0.942691	0.954518	0.0364926	11
6	LIF	6	0.942691	0.954518	0.0364926	11
8	IL7	2	0.954518	0.954518	0.0298257	11
8	PDGF.AA.AB	2	0.954518	0.954518	0.0298257	11

## Sheet: Bcell gene modules
cluster	Freq	marker	k
35	1	CD37	47
19	1	ab-CD24	47
14	1	ab-CD278	47
12	1	ab-IgG	47
4	1	ab-CD20	47
16	2	ab-CD183	47
16	2	ab-CD11c	47
11	2	ab-IgD	47
11	2	ab-IgM	47
10	2	IFIT3	47
10	2	ab-CD62L	47
9	2	ab-CD71	47
9	2	ab-CD38	47
7	2	ab-CD27	47
7	2	CD27	47
5	2	ab-CD39	47
5	2	ab-CD25	47
42	3	IGHG2-secreted	47
42	3	IGHG1-secreted	47
42	3	IGHA1-secreted	47
18	3	ab-CD21	47
18	3	ab-CD73	47
18	3	BANK1	47
17	3	ab-CD23	47
17	3	ab-CD154	47
17	3	FCER2	47
13	3	ab-TCR-alpha-beta	47
13	3	CXCL13	47
13	3	IL10	47
8	3	ab-CD4	47
8	3	ab-CD28	47
8	3	ab-CD3	47
40	4	CD79B	47
40	4	CD81	47
40	4	HLA-DRB3	47
40	4	LTB	47
36	4	CD48	47
36	4	IFITM2	47
36	4	HLA-A	47
36	4	SELL	47
34	4	CCR7	47
34	4	LGALS9	47
34	4	IFITM3	47
34	4	NCR3	47
15	4	MT-CO1	47
15	4	ab-HLA-DR	47
15	4	MT-CO2	47
15	4	ab-CD45	47
3	4	ab-CD19	47
3	4	ab-CXCR5	47
3	4	ab-CD45RA	47
3	4	ab-CD184	47
41	5	PGK1	47	Glucose
41	5	ENO1	47
41	5	GPI	47
41	5	TPI1	47
41	5	GAPDH	47
39	5	TCL1A	47	naïve
39	5	IGHM-membrane	47
39	5	CD72	47
39	5	IGHM-secreted	47
39	5	IGHD-membrane	47
38	5	CD69	47	activation
38	5	PIK3IP1	47
38	5	DUSP1	47
38	5	FOSB	47
38	5	CXCR4	47
6	5	ab-CD279	47	T-cell
6	5	ab-Tim3	47
6	5	ab-CD8	47
6	5	ab-CD45RO	47
6	5	ab-CD89	47
47	6	SLC2A1	47	Glucose2
47	6	LILRB1	47
47	6	TYK2	47
47	6	LDHA	47
47	6	RELA	47
47	6	IRF3	47
45	6	ISG15	47	IFN
45	6	XAF1	47
45	6	EIF2AK2	47
45	6	DDX60	47
45	6	IFIH1	47
45	6	IFI44L	47
43	6	IGHG3-secreted	47	Mantle/PB
43	6	PRDM1	47
43	6	PDIA4	47
43	6	MZB1	47
43	6	JCHAIN	47
43	6	XBP1	47
20	6	ab-CD95	47	IRF
20	6	LY6E	47
20	6	ab-CD69	47
20	6	IRF1	47
20	6	IRF7	47
20	6	IRF9	47
2	6	ab-CD127	47	CD16
2	6	ab-KIR-NKAT2	47
2	6	IL23R	47
2	6	IL18	47
2	6	ab-CD16	47
2	6	ab-CD158e1	47
31	7	SPOCK2	47	activation
31	7	LAIR1	47
31	7	BLK	47
31	7	JUN	47
31	7	IGLC3	47
31	7	JUNB	47
31	7	VPREB3	47
1	7	ab-CD14	47
1	7	ab-CCR7	47
1	7	ab-CD161	47
1	7	ab-TCR-Vgamma9	47
1	7	ab-CD56	47
1	7	ab-CD83	47
1	7	ab-TCR-gamma-delta	47
32	8	CD52	47	presenting
32	8	MS4A1	47
32	8	HLA-DRA	47
32	8	CD74	47
32	8	BTG1	47
32	8	HLA-DQB1	47
32	8	HLA-DPA1	47
32	8	CD22	47
30	8	LPP	47	BCL6/AID
30	8	VNN2	47
30	8	BCL6	47
30	8	MEF2B	47
30	8	MME	47
30	8	AICDA	47
30	8	TNFSF8	47
30	8	ITGAE	47
37	9	CD83	47	LZ
37	9	CHI3L2	47
37	9	CD79A	47
37	9	TRBC2	47
37	9	HLA-DMA	47
37	9	CR2	47
37	9	IFNGR1	47
37	9	IRF8	47
37	9	CD53	47
33	10	CD59	47	switched
33	10	PYCR1	47
33	10	TNFRSF17	47	BCMA
33	10	SELPLG	47
33	10	CCR2	47
33	10	IL32	47
33	10	IGHG4-secreted	47
33	10	RPN2	47
33	10	CCR10	47
33	10	IRF4	47
23	10	TNFRSF13B	47	switched2
23	10	C10orf54	47
23	10	ITGAX	47	CD11c
23	10	S100A10	47
23	10	PYCARD	47
23	10	CCR1	47
23	10	IGHG1-membrane	47
23	10	POU2AF1	47
23	10	ITGB7	47
23	10	AIM2	47
24	11	STAT1	47	IFN
24	11	SLC2A3	47
24	11	CLEC2D	47
24	11	S100A4	47
24	11	ALDOC	47
24	11	MX1	47
24	11	IFI6	47
24	11	LAP3	47
24	11	BNIP3L	47
24	11	TNFSF10	47
24	11	OAS1	47
44	12	G6PD	47	IFN2
44	12	CASP1	47
44	12	SMAD2	47
44	12	FCRL2	47
44	12	CREB3	47
44	12	IFNAR1	47
44	12	DNAJB11	47
44	12	IGKC	47
44	12	MTOR	47
44	12	IFNLR1	47
44	12	MANF	47
44	12	DNAJB9	47
46	14	SLC3A2	47	NFKB
46	14	FCRL3	47
46	14	IL21R	47
46	14	HERPUD1	47
46	14	CS	47
46	14	TFRC	47
46	14	CYCS	47
46	14	NFKB2	47
46	14	ADORA2A	47
46	14	SLC1A5	47
46	14	VDAC1	47
46	14	REL	47
46	14	FCRL5	47
46	14	HSP90B1	47
29	14	CCNB1	47	prolif
29	14	TYMS	47
29	14	UBE2C	47
29	14	AURKB	47
29	14	TK1	47
29	14	MKI67	47
29	14	PCNA	47
29	14	HMMR	47
29	14	MCM4	47
29	14	KIAA0101	47
29	14	MCM2	47
29	14	HMGB2	47
29	14	TOP2A	47
29	14	PTTG2	47
27	25	CD200	47	NFAT
27	25	CD6	47
27	25	FAM129C	47
27	25	FOXO1	47
27	25	NFATC3	47
27	25	CD5	47
27	25	BACH2	47
27	25	CXCL5	47
27	25	ARL4C	47
27	25	TIAF1	47
27	25	KLRK1	47
27	25	CD1A	47
27	25	EBF1	47
27	25	NT5E	47
27	25	CD47	47
27	25	ITGA4	47
27	25	IL4R	47
27	25	IL6	47
27	25	CD84	47
27	25	BTLA	47
27	25	BIN2	47
27	25	YBX3	47
27	25	FOXP1	47
27	25	TRIB2	47
27	25	CNOT2	47
21	25	CD58	47	TBET
21	25	PDIA6	47
21	25	LGALS1	47
21	25	ZBED2	47
21	25	ANXA5	47
21	25	CASP3	47
21	25	CXCR3	47
21	25	IL2RA	47
21	25	IL2RB	47
21	25	TNFRSF1B	47
21	25	IL15RA	47
21	25	ENTPD1	47
21	25	CD70	47
21	25	ITGAL	47
21	25	LAG3	47
21	25	DUSP4	47
21	25	LGALS3	47
21	25	DDIT4	47
21	25	CD63	47
21	25	TBX21	47
21	25	ADA	47
21	25	CCND2	47
21	25	CD86	47
21	25	NAMPT	47
21	25	CCL22	47
28	31	PASK	47	VEGFA/MYC/TLR
28	31	CCL4L1	47
28	31	CCL4	47
28	31	EGR1	47
28	31	CCL3L1	47
28	31	NFATC2	47
28	31	DOCK8	47
28	31	LIPA	47
28	31	CCL4L2	47
28	31	PFKP	47
28	31	CD46	47
28	31	CBLB	47
28	31	FYN	47
28	31	OASL	47
28	31	CCL3	47
28	31	TNFSF13B	47
28	31	DUSP2	47
28	31	VEGFA	47
28	31	EGR3	47
28	31	RSAD2	47
28	31	IGBP1	47
28	31	IKZF1	47
28	31	TCF4	47
28	31	MYC	47
28	31	BCL2	47
28	31	CD300A	47
28	31	ATF6B	47
28	31	TCF7	47
28	31	BLNK	47
28	31	TLR7	47
28	31	LRRC32	47
26	31	CD1C	47	CXCR5
26	31	TRAC	47
26	31	CD1D	47
26	31	PAX5	47
26	31	LCK	47
26	31	APOBEC3G	47
26	31	SLAMF1	47
26	31	CD24	47
26	31	PTPRC	47
26	31	CCR6	47
26	31	TNF	47
26	31	LY86	47
26	31	LYN	47
26	31	GIMAP2	47
26	31	STAT6	47
26	31	CD40	47
26	31	BCL2A1	47
26	31	FAM65B	47
26	31	CD44	47
26	31	CASP5	47
26	31	CXCR5	47
26	31	NFKB1	47
26	31	RUNX3	47
26	31	CD164	47
26	31	BIRC3	47
26	31	ITGB2	47
26	31	CD68	47
26	31	LAT2	47
26	31	FCGR2B	47
26	31	LTA	47
26	31	PIK3AP1	47
25	118	CCL5	47
25	118	CGAS	47
25	118	CD82	47
25	118	IL1B	47
25	118	IL9R	47
25	118	MMP9	47
25	118	CLEC10A	47
25	118	FLT1	47
25	118	APOE	47
25	118	CXCL8	47
25	118	GNLY	47
25	118	MMP12	47
25	118	TYROBP	47
25	118	CLEC4D	47
25	118	AQP9	47
25	118	AOC3	47
25	118	CXCL9	47
25	118	PRF1	47
25	118	CD38	47
25	118	VPS28	47
25	118	CCL19	47
25	118	CTSW	47
25	118	SPP1	47
25	118	CXCL16	47
25	118	CD9	47
25	118	FGR	47
25	118	CD14	47
25	118	C1QB	47
25	118	NFATC1	47
25	118	STAT3	47
25	118	KLRC1	47
25	118	CD80	47
25	118	NINJ2	47
25	118	NKG7	47
25	118	KLRC4	47
25	118	CD274	47
25	118	XCL2	47
25	118	CXCL12	47
25	118	IL6R	47
25	118	BATF	47
25	118	CD320	47
25	118	PRAME	47
25	118	CTSD	47
25	118	CPT1A	47
25	118	IL18RAP	47
25	118	STAT5A	47
25	118	NAIP	47
25	118	TNFRSF8	47
25	118	IL12RB1	47
25	118	B2M	47
25	118	TSPAN32	47
25	118	CCR5	47
25	118	TGFB1	47
25	118	TGFB3	47
25	118	KLRC2	47
25	118	S100A12	47
25	118	IL18R1	47
25	118	STAT2	47
25	118	PTGER4	47
25	118	CD151	47
25	118	CMKLR1	47
25	118	CXCL10	47
25	118	IER3	47
25	118	CD180	47
25	118	FCN1	47
25	118	TLR9	47
25	118	NCAM1	47
25	118	POU2F1	47
25	118	TMEM97	47
25	118	ADO	47
25	118	BAX	47
25	118	CD226	47
25	118	FOSL1	47
25	118	IL3RA	47
25	118	AHR	47
25	118	LAMP1	47
25	118	FTH1	47
25	118	TNFSF13	47
25	118	PFKFB2	47
25	118	ITGAM	47
25	118	CD1B	47
25	118	GNAI2	47
25	118	FAS	47
25	118	IFNAR2	47
25	118	FGFR1	47
25	118	GZMB	47
25	118	LILRB4	47
25	118	ICAM1	47
25	118	TREM1	47
25	118	PMCH	47
25	118	NOD2	47
25	118	HPGD	47
25	118	KIR2DL1	47
25	118	TGFBI	47
25	118	FBXO22	47
25	118	C1QA	47
25	118	TNFRSF13C	47
25	118	IL1RN	47
25	118	SLC16A1	47
25	118	FCER1G	47
25	118	THBS1	47
25	118	FCGR2A	47
25	118	SPI1	47
25	118	CXCL11	47
25	118	HNF1B	47
25	118	ITGA1	47
25	118	SEMA7A	47
25	118	S100A9	47
25	118	FCRL4	47
25	118	NFKBID	47
25	118	HK2	47
25	118	TNFRSF10B	47
25	118	IGHE-secreted	47
25	118	QPCT	47
25	118	RNASE6	47
25	118	CD101	47
25	118	TNFRSF10A	47
25	118	DDX58	47
22	173	FN1	47
22	173	KLRF1	47
22	173	KLRG1	47
22	173	TNFRSF25	47
22	173	CD244	47
22	173	CD247	47
22	173	FOXP3	47
22	173	LAMP3	47
22	173	CD276	47
22	173	CD28	47
22	173	TNFSF14	47
22	173	CD300C	47
22	173	LEF1	47
22	173	CD33	47
22	173	CD34	47
22	173	CD36	47
22	173	LIF	47
22	173	ITGA10	47
22	173	CD3D	47
22	173	CD3E	47
22	173	CD3G	47
22	173	CD4	47
22	173	GZMK	47
22	173	CD40LG	47
22	173	B3GAT1	47
22	173	CSF3	47
22	173	MGST1	47
22	173	MITF	47
22	173	VMO1	47
22	173	CTSG	47
22	173	TIGIT	47
22	173	CX3CR1	47
22	173	HNRNPLL	47
22	173	IL2	47
22	173	ICOS	47
22	173	IL22	47
22	173	IER5	47
22	173	CD7	47
22	173	NCR1	47
22	173	ZBTB16	47
22	173	ZNF683	47
22	173	IFNA1	47
22	173	IFNG	47
22	173	ADORA2B	47
22	173	ADORA3	47
22	173	CCL17	47
22	173	NRP1	47
22	173	ADGRE1	47
22	173	ADGRG1	47
22	173	ADGRG3	47
22	173	AHNAK	47
22	173	DPP4	47
22	173	CHI3L1	47
22	173	PDCD1	47
22	173	CLC	47
22	173	TPSAB1	47
22	173	PECAM1	47
22	173	TRAT1	47
22	173	ARG1	47
22	173	PI3	47
22	173	ASCL2	47
22	173	CCR3	47
22	173	CNTNAP3	47
22	173	AZU1	47
22	173	POU4F1	47
22	173	ITGB1	47
22	173	CST7	47
22	173	BCL11B	47
22	173	ITK	47
22	173	CD109	47
22	173	FCER1A	47
22	173	RAG1	47
22	173	CXCL1	47
22	173	CD163	47
22	173	IL21	47
22	173	TLR8	47
22	173	IL23A	47
22	173	FGFBP2	47
22	173	CXCL2	47
22	173	CXCL3	47
22	173	CD2	47
22	173	TNFRSF18	47
22	173	IL3	47
22	173	CXCR1	47
22	173	CCL1	47
22	173	FOXO3	47
22	173	IL4	47
22	173	CCL2	47
22	173	CCL20	47
22	173	SLC7A7	47
22	173	SNCA	47
22	173	CD8B	47
22	173	IL9	47
22	173	CCL24	47
22	173	GATA3	47
22	173	CTLA4	47
22	173	STAT4	47
22	173	PTGER2	47
22	173	ITGA2	47
22	173	TARP-refseq	47
22	173	EOMES	47
22	173	TRGC2	47
22	173	CCR4	47
22	173	F5	47
22	173	HAVCR2	47
22	173	CSF2	47
22	173	CCR8	47
22	173	CCR9	47
22	173	FLT3	47
22	173	PTGER3	47
22	173	TGFA	47
22	173	TLR5	47
22	173	CD160	47
22	173	VSIG4	47
22	173	FCGR3A	47
22	173	XCL1	47
22	173	FCRL6	47
22	173	KIT	47
22	173	ZAP70	47
22	173	IL25	47
22	173	IL26	47
22	173	IL17F	47
22	173	TNFRSF1A	47
22	173	GIMAP5	47
22	173	THBD	47
22	173	CXCR2	47
22	173	LAIR2	47
22	173	TNFRSF9	47
22	173	AIRE	47
22	173	FUT4	47
22	173	FYB	47
22	173	LAT	47
22	173	GAB2	47
22	173	SOX13	47
22	173	IFNA2	47
22	173	FASLG	47
22	173	PTGDR2	47
22	173	KLRC3	47
22	173	IL31	47
22	173	TRDC	47
22	173	GZMA	47
22	173	CMTM2	47
22	173	GZMH	47
22	173	IL12RB2	47
22	173	IL13	47
22	173	TXK	47
22	173	IL15	47
22	173	RORA	47
22	173	PTCRA	47
22	173	STING1	47
22	173	KDELR1	47
22	173	IL7R	47
22	173	IL1R2	47
22	173	RGS1	47
22	173	KLRB1	47
22	173	IKZF2	47
22	173	RORC	47
22	173	CD8A	47
22	173	PSEN1	47
22	173	DNTT	47
22	173	SLC25A37	47
22	173	CXCR6	47
22	173	TNFRSF4	47
22	173	CLEC4E	47
22	173	KCNE3	47
22	173	ITGAD	47
22	173	F13A1	47
22	173	IL12A	47
22	173	IL5	47
22	173	EPX	47
22	173	TLR3	47
22	173	TLR2	47
22	173	HGF	47

## Sheet: Bcell gene module interactions
Var1	Var2	p	fdr	diff	FC	sig	adults	toddlers	avg
glucose_module	CD16_module	0.00019996	0.00084983	0.113271	#DIV/0!	yes	0.113271	0	0.0566354
naive_module	MYC_module	0.00019996	0.00084983	0.107134	#DIV/0!	yes	0.107134	0	0.0535669
CD16_module	presenting_module	0.00019996	0.00084983	0.0976366	#DIV/0!	yes	0.0976366	0	0.0488183
MX1_module	TBET_module	0.00019996	0.00084983	0.0943114	#DIV/0!	yes	0.0943114	0	0.0471557
naive_module	BCL6_module	0.00019996	0.00084983	0.0862394	#DIV/0!	yes	0.0862394	0	0.0431197
CD16_module	LZ_module	0.00019996	0.00084983	0.0815997	#DIV/0!	yes	0.0815997	0	0.0407998
naive_module	prolif_module	0.00019996	0.00084983	0.0791214	#DIV/0!	yes	0.0791214	0	0.0395607
CD16_module	BCL6_module	0.00939812	0.023239	0.0568217	#DIV/0!	yes	0.0568217	0	0.0284108
switched_module2	TBET_module	0.0171966	0.0410304	0.0543279	#DIV/0!	yes	0.0543279	0	0.027164
switched_module	TBET_module	0.00839832	0.0215504	0.0524475	#DIV/0!	yes	0.0524475	0	0.0262237
PB_module	prolif_module	0.00019996	0.00084983	0.117899	14.2503	yes	0.126172	0.00827344	0.0672229
LZ_module	switched_module	0.00339932	0.00983633	0.052222	12.9586	yes	0.0481921	-0.0040299	0.0220811
switched_module	prolif_module	0.00019996	0.00084983	0.0883924	11.0274	yes	0.0964081	0.00801572	0.0522119
PB_module	switched_module2	0.00019996	0.00084983	0.0963339	8.47627	yes	0.107699	0.0113651	0.0595321
LZ_module	MX1_module	0.0471906	0.0943811	0.044493	7.27857	yes	0.0506059	0.00611287	0.0283594
switched_module	MX1_module	0.00019996	0.00084983	0.0777245	5.98537	yes	0.0907103	0.0129858	0.051848
naive_module	activation_module	0.00039992	0.00151081	0.0535928	5.41512	yes	0.0436959	-0.00989689	0.0168995
naive_module	CD16_module	0.00019996	0.00084983	0.117711	5.23508	yes	0.0952263	-0.0224851	0.0363706
naive_module	NFAT_module	0.00019996	0.00084983	0.308371	5.13615	yes	0.368411	0.0600394	0.214225
PB_module	CD16_module	0.00119976	0.00388494	0.0776786	3.64288	yes	0.099002	0.0213234	0.0601627
switched_module2	CXCR5_module	0.00019996	0.00084983	0.0777911	3.04985	yes	0.0522845	-0.0255065	0.013389
naive_module	LZ_module	0.00019996	0.00084983	0.2098	2.78122	yes	0.134365	-0.0754343	0.0294654
naive_module	switched_module	0.00019996	0.00084983	0.107467	2.16417	yes	0.0578098	-0.0496575	0.00407612
naive_module	MX1_module	0.00019996	0.00084983	0.162904	1.8227	yes	0.073529	-0.0893751	-0.00792302
PB_module	switched_module	0.00019996	0.00084983	0.188466	1.29935	yes	0.333512	0.145047	0.23928
naive_module	TBET_module	0.00019996	0.00084983	0.110416	1	yes	0	-0.110416	-0.0552078
naive_module	CXCR5_module	0.00019996	0.00084983	0.151061	0.926953	yes	-0.0119042	-0.162965	-0.0874345
activation_module2	presenting_module	0.0195961	0.0459494	0.0507959	0.78896	yes	-0.0135875	-0.0643833	-0.0389854
naive_module	PB_module	0.00039992	0.00151081	0.0819205	0.683453	yes	-0.0379422	-0.119863	-0.0789024
naive_module	presenting_module	0.00039992	0.00151081	0.112973	0.641089	yes	-0.0632473	-0.17622	-0.119734
LZ_module	switched_module2	0.0009998	0.00331641	0.0709767	0.570049	yes	-0.053533	-0.12451	-0.0890214
CD16_module	CXCR5_module	0.0409918	0.0871076	0.0467115	0.554371	yes	-0.0375489	-0.0842604	-0.0609047
presenting_module	TBET_module	0.05019	0.0975119	0.038188	0.484879	yes	-0.0405697	-0.0787577	-0.0596637
glucose_module	naive_module	0.00019996	0.00084983	0.122083	0.380066	yes	-0.199133	-0.321216	-0.260174
glucose_module	TBET_module	0.00059988	0.00203959	0.0706908	0.353067	yes	0.27091	0.200219	0.235565
glucose_module	activation_module	0.00419916	0.0116548	0.0585497	0.348455	yes	0.226576	0.168027	0.197301
naive_module	switched_module2	0.00019996	0.00084983	0.0862159	0.239134	yes	-0.274318	-0.360534	-0.317426
presenting_module	LZ_module	0.0317936	0.0717758	-0.0448182	-0.21606	yes	0.162616	0.207434	0.185025
activation_module	TBET_module	0.00059988	0.00203959	-0.0746674	-0.321702	yes	-0.306768	-0.232101	-0.269435
glucose_module	MX1_module	0.00639872	0.0170633	-0.0578625	-0.33367	yes	0.11555	0.173412	0.144481
NFAT_module	TBET_module	0.00219956	0.00695675	-0.0643462	-0.337505	yes	-0.254999	-0.190652	-0.222826
PB_module	presenting_module	0.00019996	0.00084983	-0.0916669	-0.458511	yes	-0.29159	-0.199923	-0.245757
LZ_module	NFAT_module	0.00939812	0.023239	-0.0539812	-0.486173	yes	0.0570518	0.111033	0.0840423
activation_module2	TBET_module	0.00279944	0.00865281	-0.0628508	-0.528842	yes	-0.181697	-0.118846	-0.150272
BCL6_module	MX1_module	0.0219956	0.0507017	-0.0532288	-0.594646	yes	0.0362847	0.0895135	0.0628991
glucose_module	prolif_module	0.0069986	0.018304	-0.0592056	-0.602961	yes	0.0389858	0.0981914	0.0685886
activation_module	NFAT_module	0.00019996	0.00084983	-0.0910321	-0.71228	yes	0.0367717	0.127804	0.0822878
presenting_module	NFAT_module	0.00019996	0.00084983	-0.126566	-0.715269	yes	0.050383	0.176949	0.113666
BCL6_module	prolif_module	0.004999	0.0135973	-0.0667475	-0.798053	yes	0.0168904	0.0836378	0.0502641
presenting_module	MX1_module	0.00019996	0.00084983	-0.154556	-0.832592	yes	0.0310764	0.185632	0.108354
activation_module	MYC_module	0.0469906	0.0943811	-0.0399171	-1	yes	0	0.0399171	0.0199586
glucose_module	BCL6_module	0.0429914	0.0899512	-0.0462091	-1	yes	0	0.0462091	0.0231046
glucose_module	LZ_module	0.00019996	0.00084983	-0.106161	-1	yes	0	0.106161	0.0530807
activation_module	MX1_module	0.00019996	0.00084983	-0.111926	-1.59694	yes	-0.182014	-0.0700878	-0.126051
PB_module	activation_module2	0.00319936	0.00945898	-0.0404002	-1.67491	yes	-0.0162794	0.0241208	0.00392071
switched_module	MYC_module	0.0437912	0.0902365	-0.0459928	-1.87358	yes	-0.0705409	-0.0245481	-0.0475445
BCL6_module	switched_module	0.0405919	0.0871076	-0.022778	-1.98947	yes	-0.0113287	0.0114493	6.02943e-05
presenting_module	BCL6_module	0.00319936	0.00945898	-0.0337672	-2.96407	yes	-0.022375	0.0113922	-0.0054914
activation_module	LZ_module	0.00059988	0.00203959	-0.0565877	-3.32158	yes	-0.0395513	0.0170364	-0.0112575
NFAT_module	MYC_module	0.00379924	0.0107645	-0.0741709	-3.46616	yes	-0.0955694	-0.0213985	-0.058484
activation_module	PB_module	0.00979804	0.0237952	-0.055221	-4.01892	yes	-0.0689613	-0.0137403	-0.0413508
prolif_module	MYC_module	0.00039992	0.00151081	-0.0891667	-4.55704	yes	-0.108733	-0.0195668	-0.0641501
activation_module	switched_module2	0.00019996	0.00084983	-0.0866256	-5.44404	yes	-0.102538	-0.015912	-0.0592248
MX1_module	NFAT_module	0.00019996	0.00084983	-0.102274	-6.75022	yes	-0.0871227	0.0151512	-0.0359858
glucose_module	CXCR5_module	0.00019996	0.00084983	-0.127867	-13.6442	yes	-0.118495	0.00937153	-0.0545619
prolif_module	TBET_module	0.0375925	0.0824609	-0.0506242	-13.9144	yes	-0.0542624	-0.00363825	-0.0289503
BCL6_module	CXCR5_module	0.0321936	0.0717758	-0.0221646	#DIV/0!	yes	-0.0221646	0	-0.0110823
BCL6_module	switched_module2	0.04999	0.0975119	-0.0322168	#DIV/0!	yes	-0.0322168	0	-0.0161084
glucose_module	NFAT_module	0.00059988	0.00203959	-0.0534517	#DIV/0!	yes	-0.0534517	0	-0.0267259
NFAT_module	CXCR5_module	0.00019996	0.00084983	-0.074848	#DIV/0!	yes	-0.074848	0	-0.037424
CD16_module	switched_module2	0.0819836	0.148664	0.0427477	#DIV/0!	no	0.0427477	0	0.0213738
PB_module	MX1_module	0.118976	0.194949	0.038019	#DIV/0!	no	0.038019	0	0.0190095
switched_module	switched_module2	0.103179	0.177625	0.0344778	#DIV/0!	no	0.0344778	0	0.0172389
presenting_module	switched_module2	0.104779	0.178124	0.0326296	#DIV/0!	no	0.0326296	0	0.0163148
switched_module2	prolif_module	0.0975805	0.17235	0.0297318	#DIV/0!	no	0.0297318	0	0.0148659
LZ_module	prolif_module	0.183963	0.271946	0.0270551	#DIV/0!	no	0.0270551	0	0.0135276
glucose_module	switched_module	0.219956	0.312737	0.0209661	#DIV/0!	no	0.0209661	0	0.0104831
PB_module	NFAT_module	0.338332	0.44673	0.0185297	#DIV/0!	no	0.0185297	0	0.00926483
activation_module	CD16_module	0.127175	0.199427	0.0176948	#DIV/0!	no	0.0176948	0	0.0088474
CD16_module	activation_module2	0.569886	0.662432	0.00302856	#DIV/0!	no	0.00302856	0	0.00151428
MX1_module	prolif_module	0.419116	0.527776	0.0176785	1.79373	no	0.0275342	0.00985572	0.018695
CD16_module	MX1_module	0.215157	0.311291	0.0302446	1	no	0	-0.0302446	-0.0151223
CD16_module	prolif_module	0.288742	0.388801	0.0251648	0.58458	no	0.0682125	0.0430477	0.0556301
CD16_module	switched_module	0.125775	0.199427	0.0344371	0.521316	no	0.100495	0.066058	0.0832766
CD16_module	TBET_module	0.124775	0.199427	0.0335173	0.468988	no	-0.03795	-0.0714673	-0.0547086
switched_module2	MX1_module	0.354729	0.459459	0.0220145	0.434089	no	-0.0286997	-0.0507142	-0.039707
glucose_module	switched_module2	0.182164	0.271946	0.0287107	0.384943	no	-0.0458735	-0.0745842	-0.0602289
glucose_module	presenting_module	0.0635873	0.118464	0.049711	0.248538	no	-0.150302	-0.200013	-0.175158
switched_module	CXCR5_module	0.231354	0.324372	0.0245813	0.243637	no	-0.076312	-0.100893	-0.0886026
PB_module	LZ_module	0.369726	0.474366	0.0183537	0.21238	no	-0.0680657	-0.0864194	-0.0772425
activation_module	presenting_module	0.437912	0.546386	0.0175625	0.212013	no	0.100399	0.0828368	0.091618
activation_module	prolif_module	0.714057	0.784037	0.00807746	0.134796	no	0.068001	0.0599235	0.0639623
BCL6_module	NFAT_module	0.892621	0.926691	0.00300506	0.101441	no	0.0326287	0.0296236	0.0311262
presenting_module	MYC_module	0.74945	0.815402	0.00710919	0.0869747	no	0.0888478	0.0817387	0.0852932
glucose_module	activation_module2	0.871626	0.911855	0.00362418	0.0843393	no	-0.0393472	-0.0429714	-0.0411593
presenting_module	CXCR5_module	0.692062	0.777854	0.00752874	0.0233274	no	0.330271	0.322742	0.326507
PB_module	BCL6_module	0.969406	0.998782	0.00080503	0.0184069	no	0.0445403	0.0437353	0.0441378
PB_module	CXCR5_module	0.656669	0.750478	-0.009315	-0.0474832	no	-0.205489	-0.196174	-0.200832
TBET_module	MYC_module	0.791842	0.854686	-0.00602493	-0.0713334	no	-0.0904865	-0.0844616	-0.0874741
LZ_module	MYC_module	0.714857	0.784037	-0.0077603	-0.0775253	no	0.0923399	0.1001	0.0962201
activation_module	activation_module2	0.609078	0.701988	-0.0109232	-0.0962299	no	0.102589	0.113512	0.10805
BCL6_module	MYC_module	0.837632	0.883085	-0.00505231	-0.120582	no	-0.0469516	-0.0418993	-0.0444254
glucose_module	MYC_module	0.174365	0.263485	-0.0288344	-0.127357	no	0.197573	0.226407	0.21199
BCL6_module	TBET_module	0.558488	0.654779	-0.0134466	-0.168089	no	-0.0934435	-0.0799969	-0.0867202
activation_module2	MX1_module	0.538092	0.636353	-0.0132508	-0.178936	no	-0.087304	-0.0740532	-0.0806786
presenting_module	switched_module	0.714257	0.784037	-0.00795931	-0.179519	no	-0.0522962	-0.0443369	-0.0483166
switched_module2	NFAT_module	0.4981	0.604836	-0.0155068	-0.185323	no	-0.0991814	-0.0836746	-0.091428
TBET_module	CXCR5_module	0.668666	0.757822	-0.00948983	-0.208481	no	-0.0550088	-0.045519	-0.0502639
activation_module	CXCR5_module	0.240352	0.33355	-0.0271409	-0.213242	no	-0.154418	-0.127277	-0.140848
LZ_module	CXCR5_module	0.0623875	0.117843	-0.0412944	-0.238236	no	0.132039	0.173334	0.152687
activation_module2	CXCR5_module	0.477305	0.584806	-0.0156671	-0.275491	no	-0.072537	-0.0568699	-0.0647035
PB_module	MYC_module	0.446511	0.55205	-0.0172359	-0.296015	no	-0.0754621	-0.0582263	-0.0668442
switched_module2	MYC_module	0.271146	0.372483	-0.0251808	-0.314238	no	-0.105314	-0.0801329	-0.0927233
CD16_module	NFAT_module	0.220756	0.312737	-0.028542	-0.408001	no	0.0414136	0.0699556	0.0556846
activation_module2	prolif_module	0.809238	0.859816	-0.00507913	-0.554682	no	-0.014236	-0.00915684	-0.0116964
MX1_module	CXCR5_module	0.341932	0.447141	-0.022103	-0.570236	no	0.0166582	0.0387612	0.0277097
activation_module2	MYC_module	0.315537	0.420716	-0.0224842	-0.724858	no	-0.053503	-0.0310188	-0.0422609
activation_module	BCL6_module	0.211158	0.30879	-0.0280832	-0.736776	no	0.0100331	0.0381163	0.0240747
activation_module2	LZ_module	0.10038	0.175021	-0.036004	-0.753439	no	-0.0837902	-0.0477862	-0.0657882
activation_module2	BCL6_module	0.531094	0.633586	-0.00499171	-1	no	0	0.00499171	0.00249586
prolif_module	NFAT_module	0.80024	0.85695	-0.0058061	-1	no	0	0.0058061	0.00290305
MX1_module	MYC_module	0.408318	0.518984	-0.0126887	-1	no	0	0.0126887	0.00634433
BCL6_module	LZ_module	0.127574	0.199427	-0.0326638	-1	no	0	0.0326638	0.0163319
glucose_module	PB_module	0.089782	0.160663	-0.0439569	-1.14465	no	-0.082359	-0.0384021	-0.0603806
CD16_module	MYC_module	0.513097	0.617533	-0.00299686	#DIV/0!	no	-0.00299686	0	-0.00149843
switched_module	NFAT_module	0.285543	0.388338	-0.00526994	#DIV/0!	no	-0.00526994	0	-0.00263497
activation_module2	NFAT_module	0.15037	0.230695	-0.00820648	#DIV/0!	no	-0.00820648	0	-0.00410324
activation_module2	switched_module	0.107179	0.179954	-0.0204772	#DIV/0!	no	-0.0204772	0	-0.0102386
prolif_module	CXCR5_module	0.0787842	0.144793	-0.0206522	#DIV/0!	no	-0.0206522	0	-0.0103261
MYC_module	CXCR5_module	0.15097	0.230695	-0.0255699	#DIV/0!	no	-0.0255699	0	-0.012785
naive_module	activation_module2	0.115977	0.192352	-0.0391602	#DIV/0!	no	-0.0391602	0	-0.0195801
activation_module2	switched_module2	0.0607878	0.116439	-0.0450118	#DIV/0!	no	-0.0450118	0	-0.0225059
activation_module	switched_module	1	1	0	#N/A	no	0	0	0
LZ_module	TBET_module	1	1	0	#N/A	no	0	0	0
PB_module	TBET_module	1	1	0	#N/A	no	0	0	0
presenting_module	prolif_module	1	1	0	#N/A	no	0	0	0
